# Supplementary material
Source: ML conference proceedings conference paper supplement (https://openreview.net/forum?id=OyNnNCYLpO)
Supplement: supplementary_material [file attachment]

# Supplemental Material

submission id 11

submitted to Graphics Interface 2024

# README

- This supplemental material includes rendering comparisons between Sun's model, Fresnel model, and diffraction model.

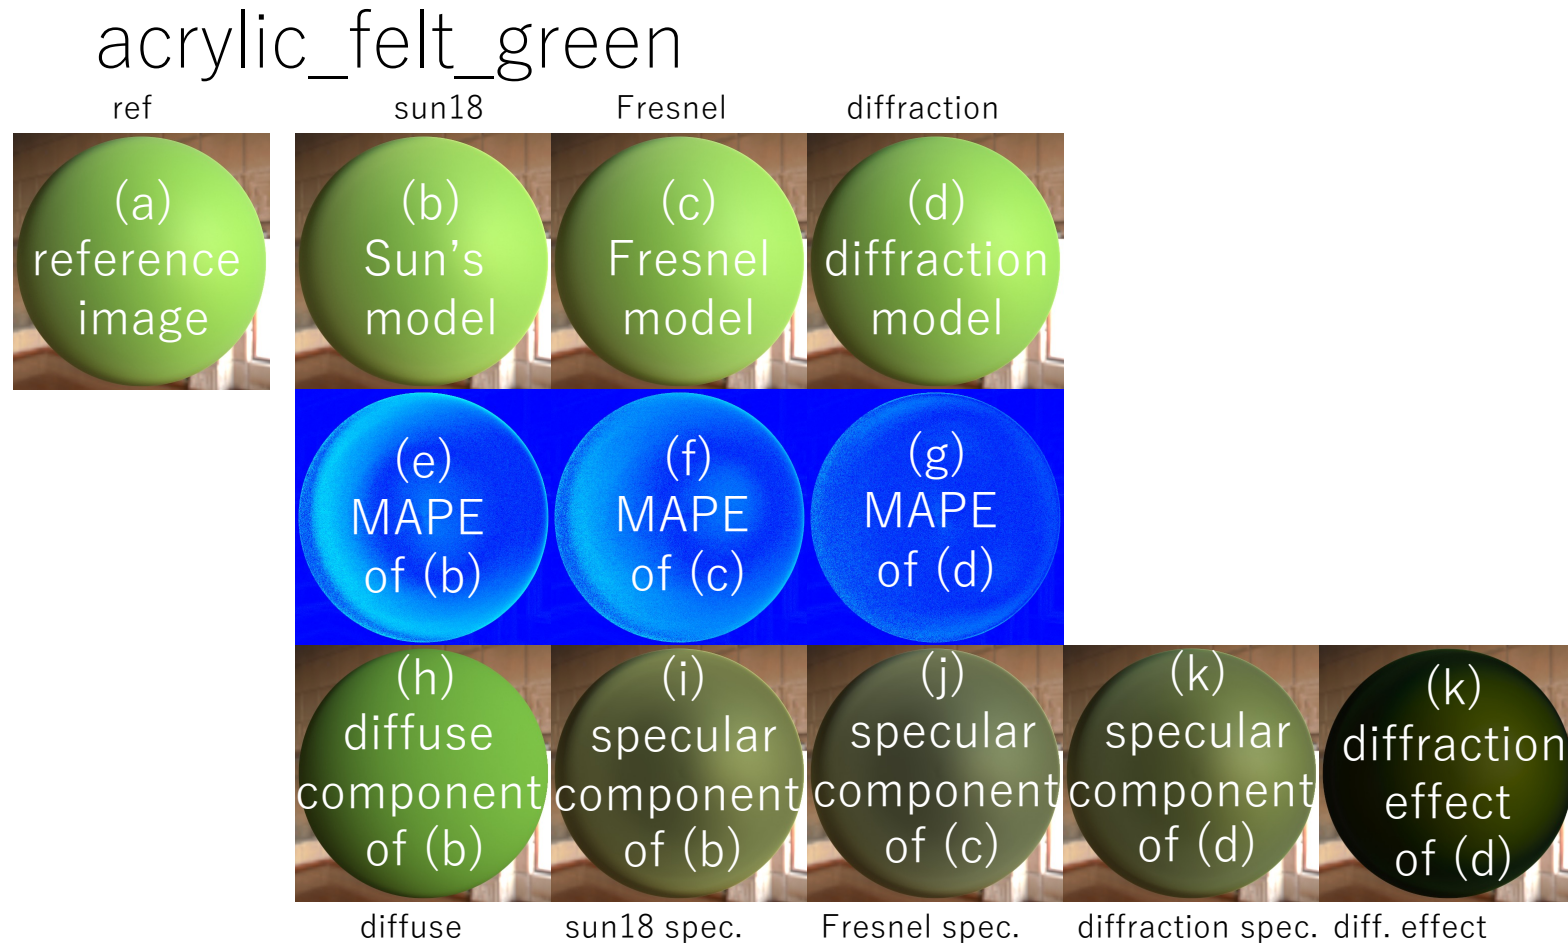

# acrylic\_felt\_green

ref

sun18

Fresnel

diffraction

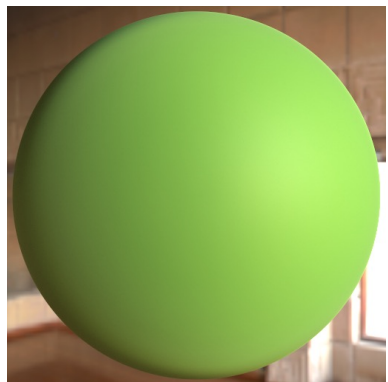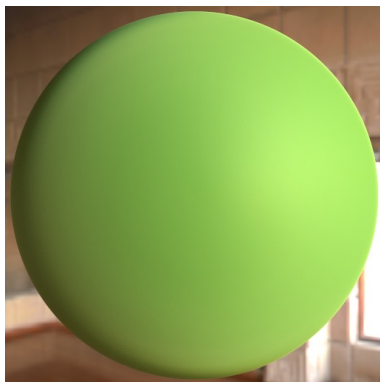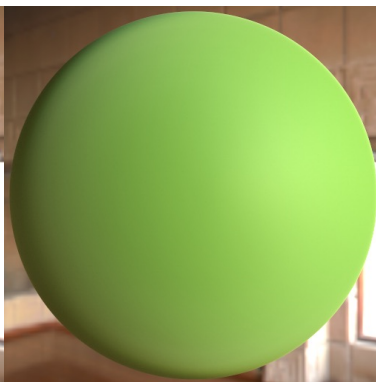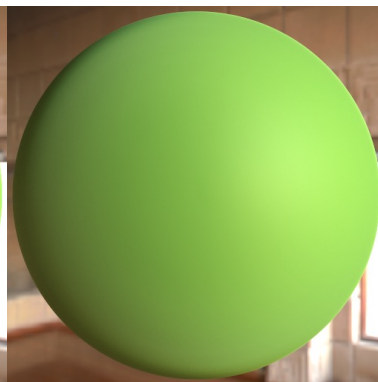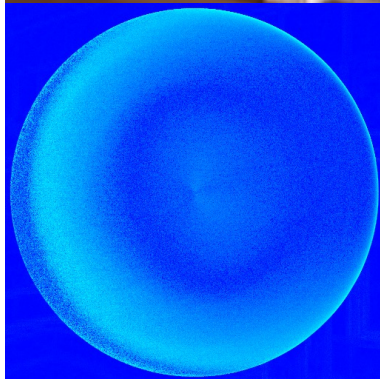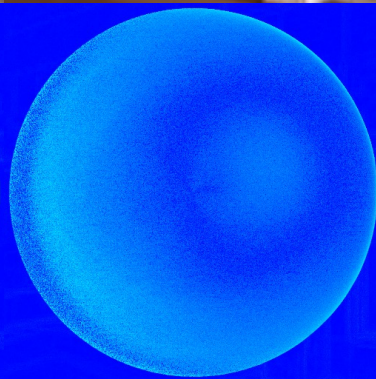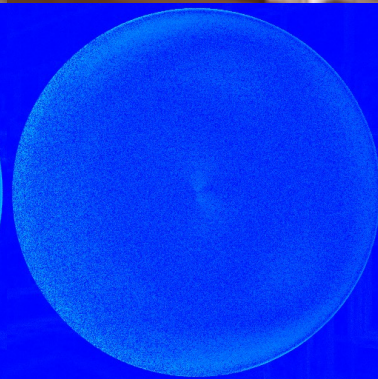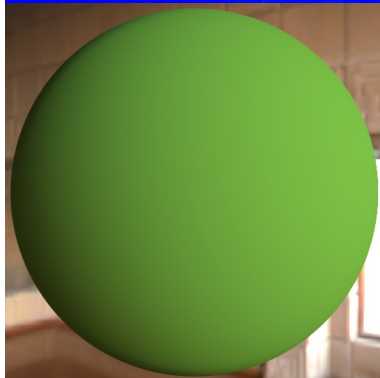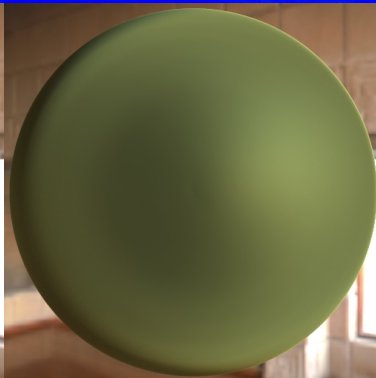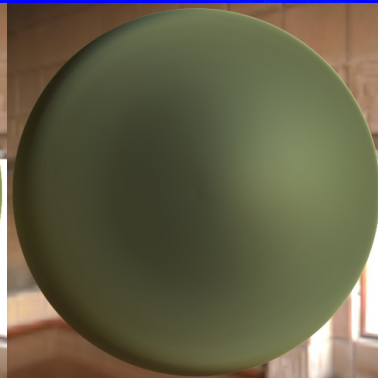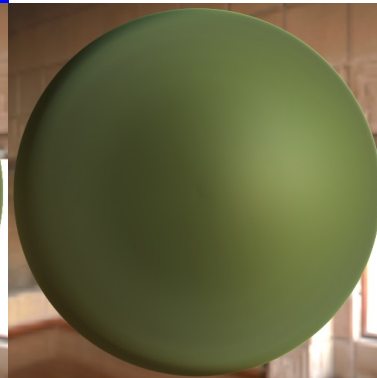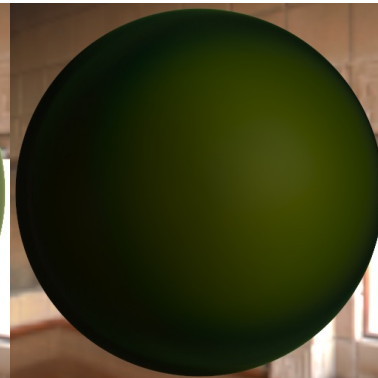

diffuse

sun18 spec.

Fresnel spec.

diffraction spec. diff. effect

# acrylic\_felt\_orange

ref

sun18

Fresnel

diffraction

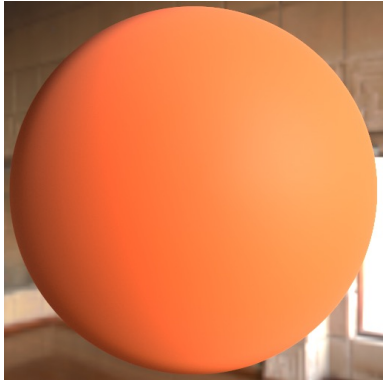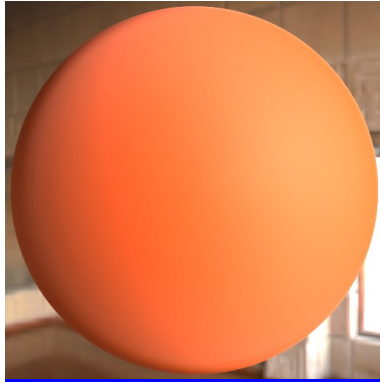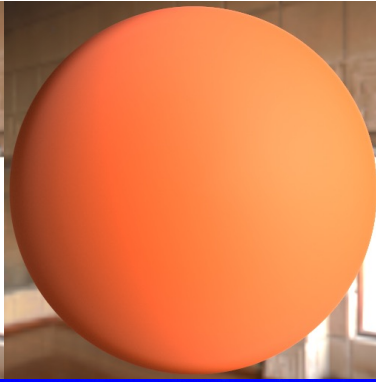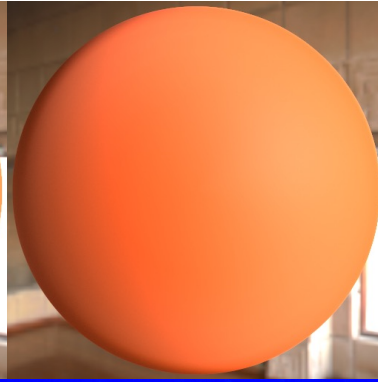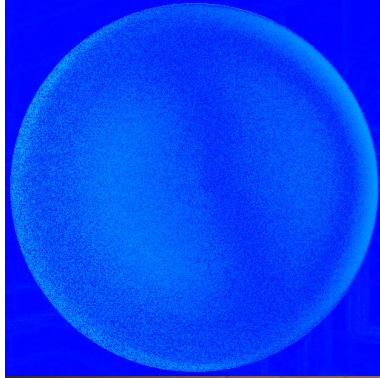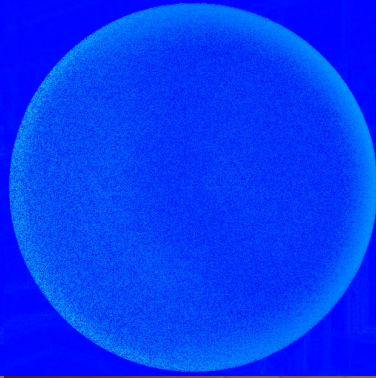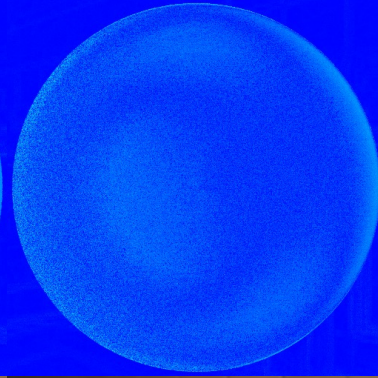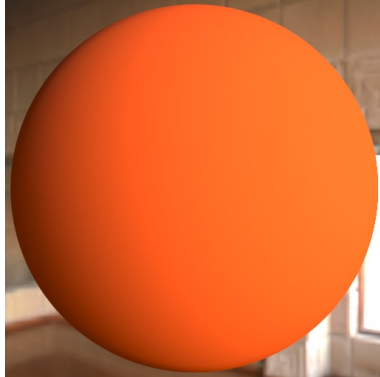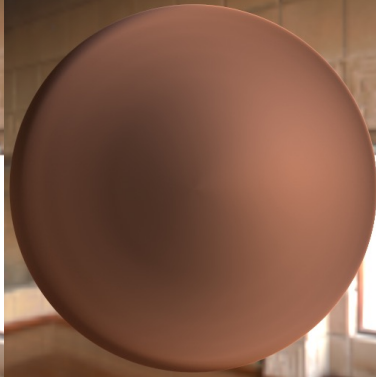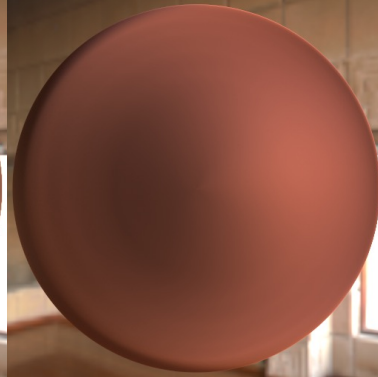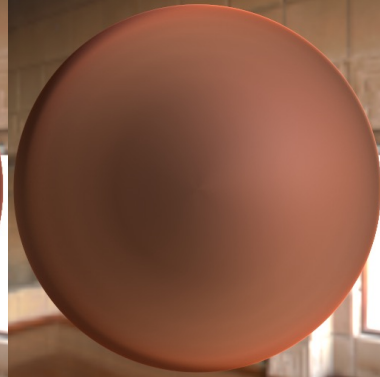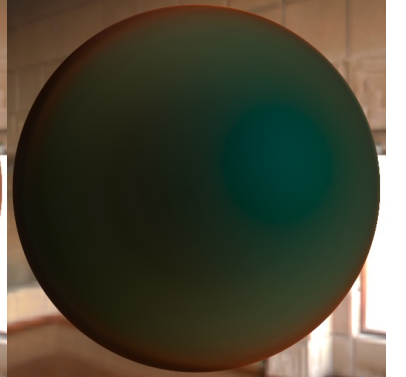

diffuse

sun18 spec.

Fresnel spec.

diffraction spec. diff. effect

# acrylic\_felt\_pink

ref

sun18

Fresnel

diffraction

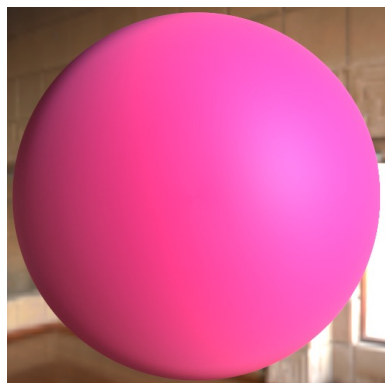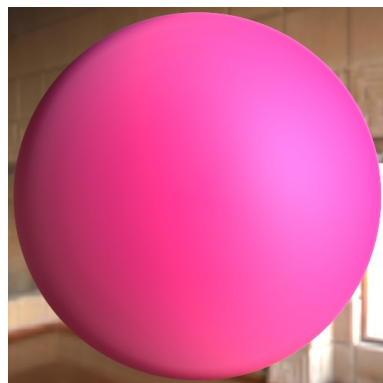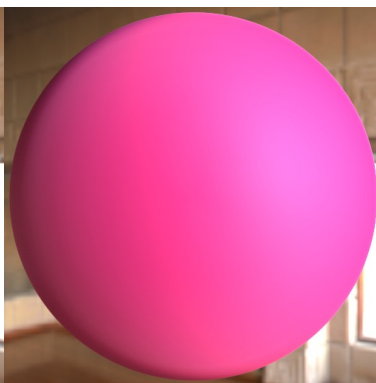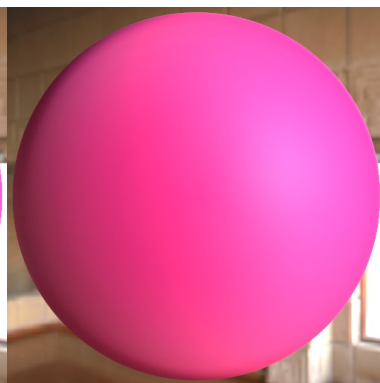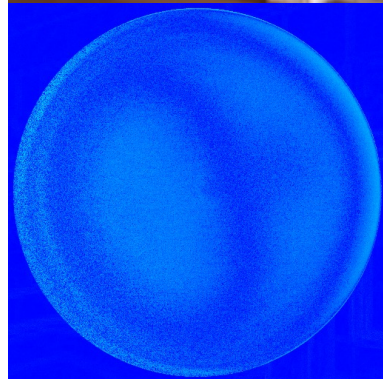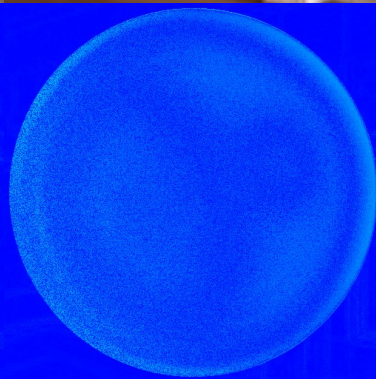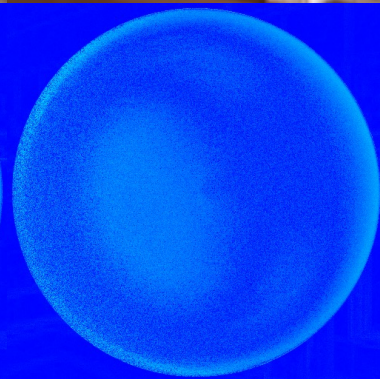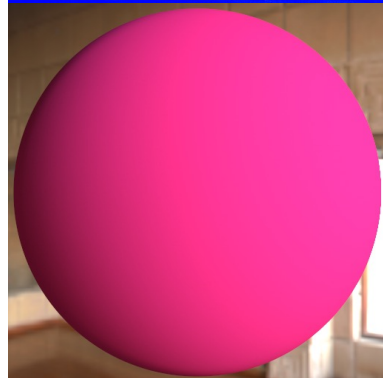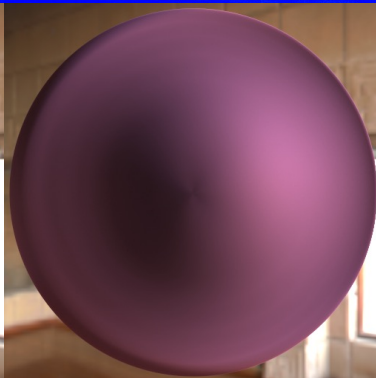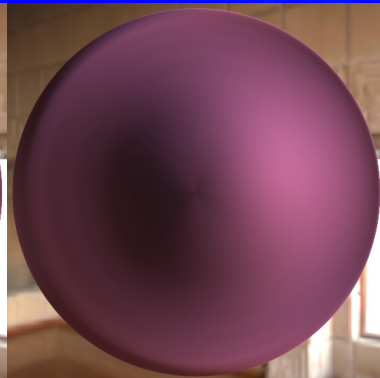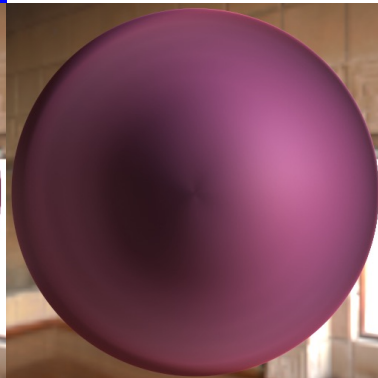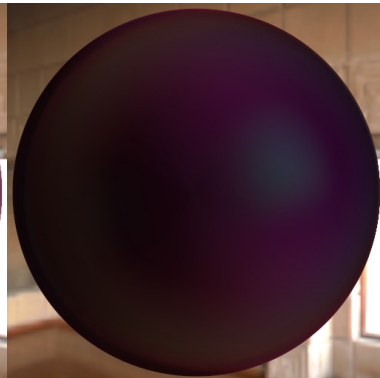

diffuse

sun18 spec.

Fresnel spec.

diffraction spec. diff. effect

# acrylic\_felt\_purple

ref

sun18

Fresnel

diffraction

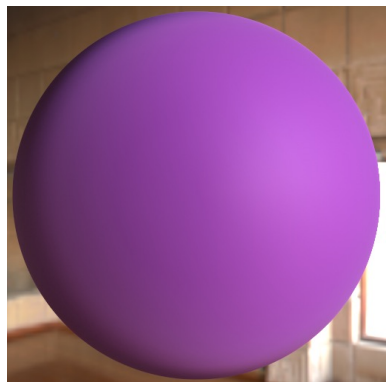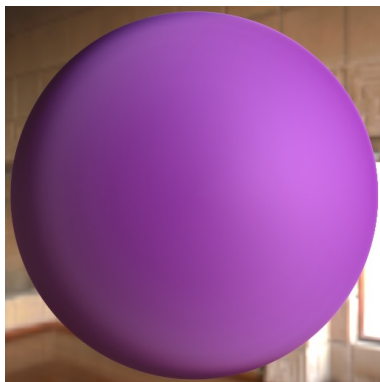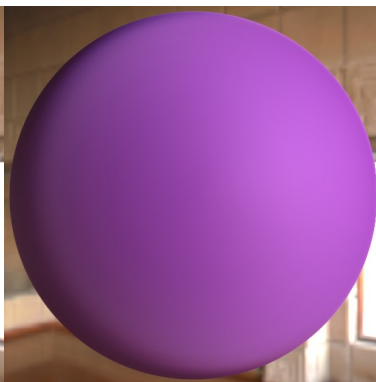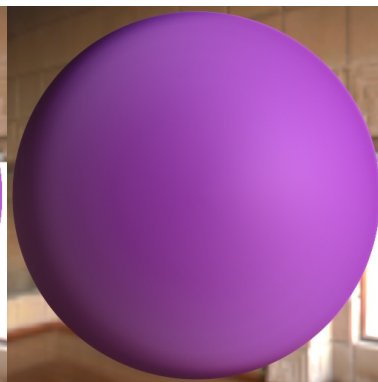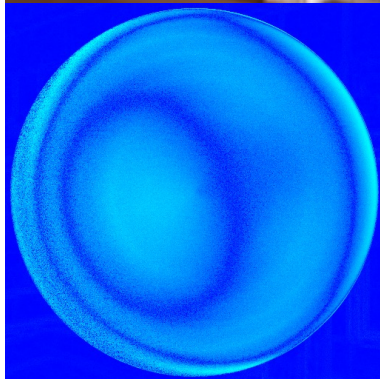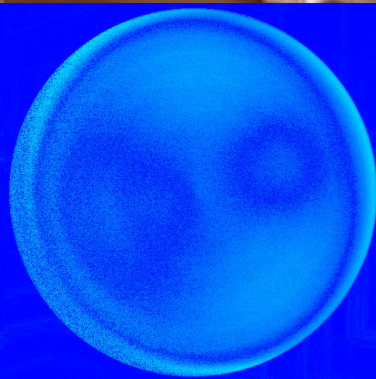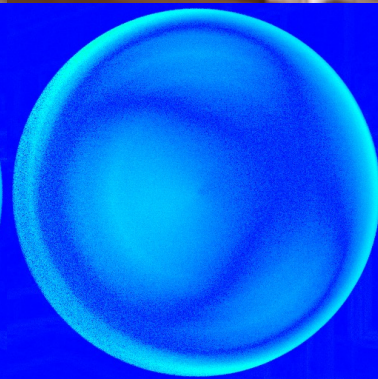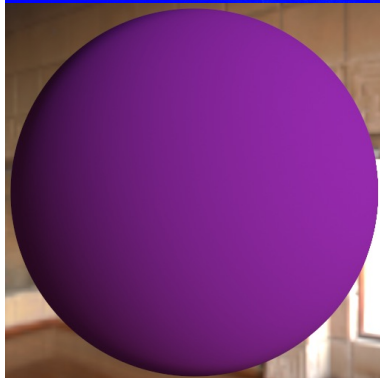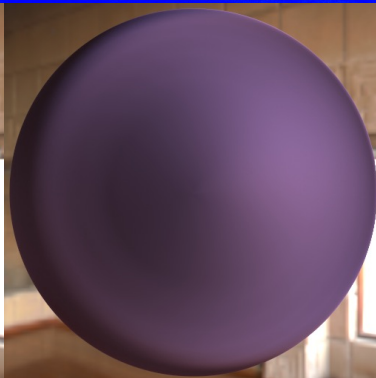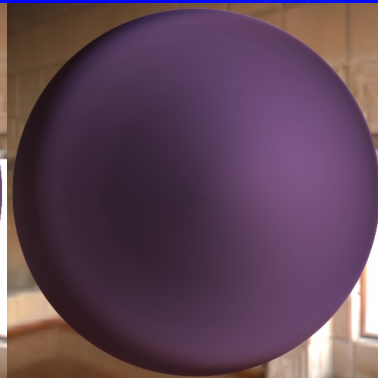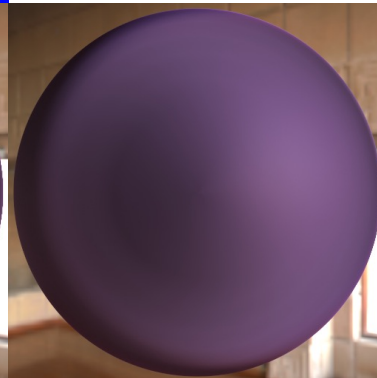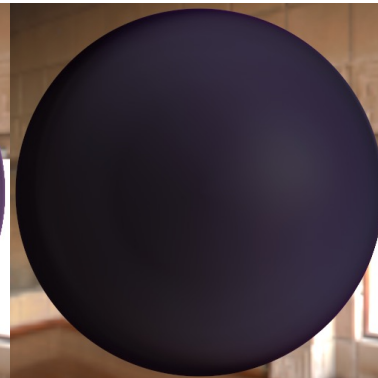

diffuse

sun18 spec.

Fresnel spec.

diffraction spec. diff. effect

# acrylic\_felt\_white

ref

sun18

Fresnel

diffraction

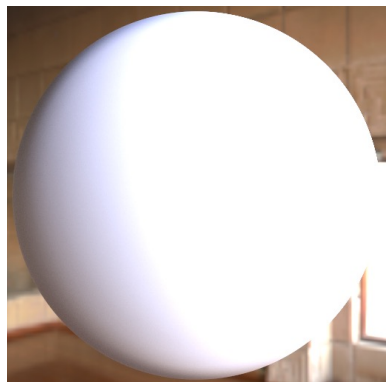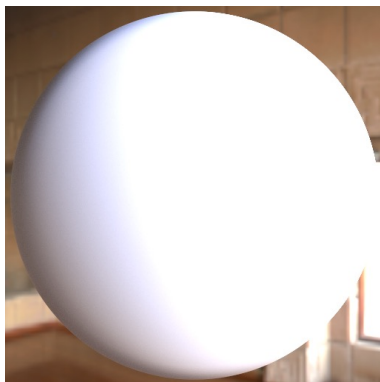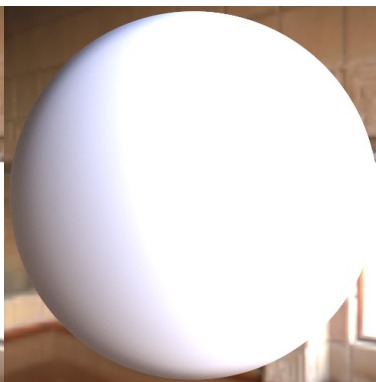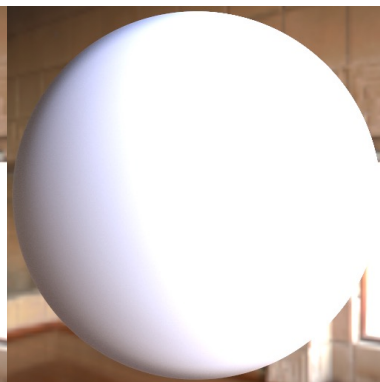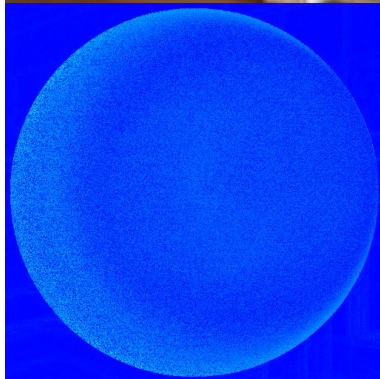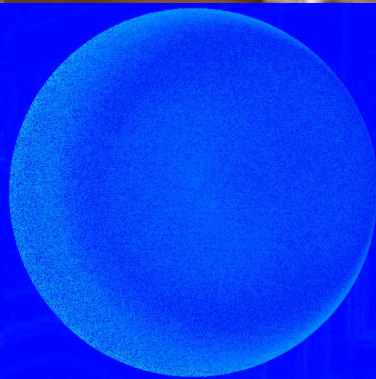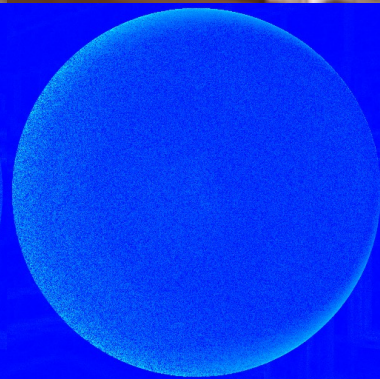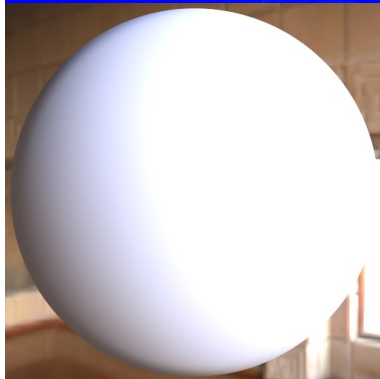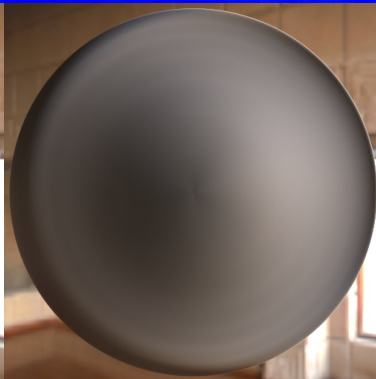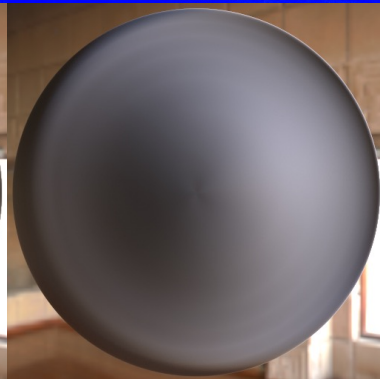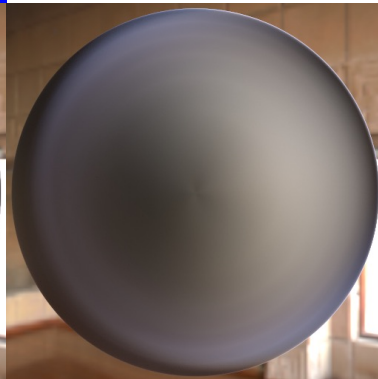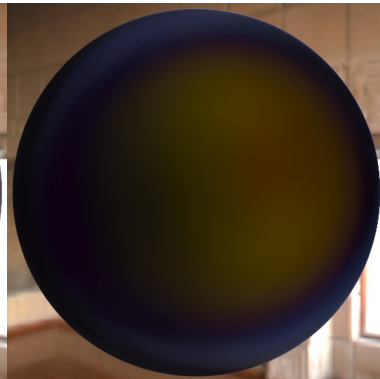

diffuse

sun18 spec.

Fresnel spec.

diffraction spec. diff. effect

# acrylic\_felt\_yellow

ref

sun18

Fresnel

diffraction

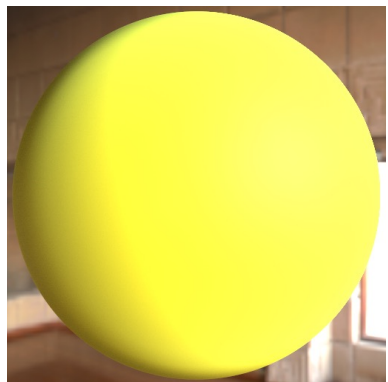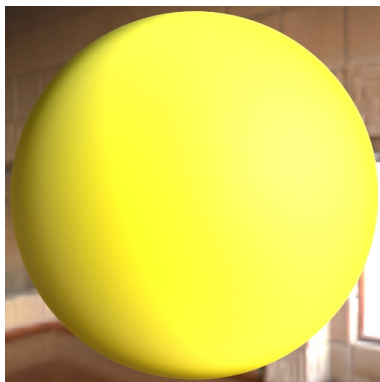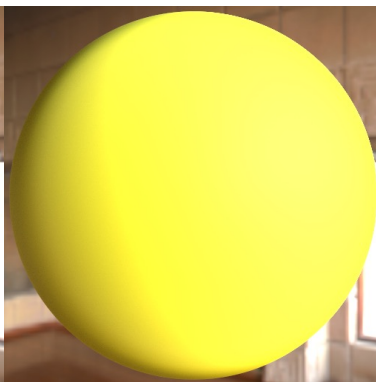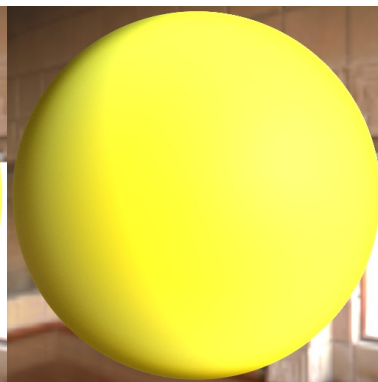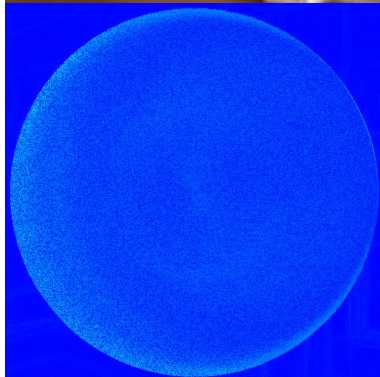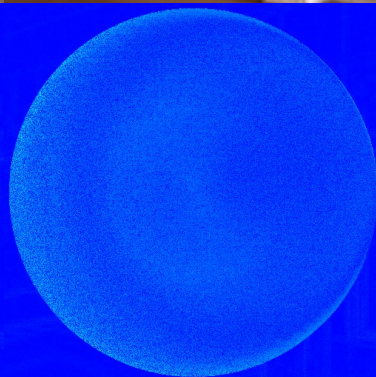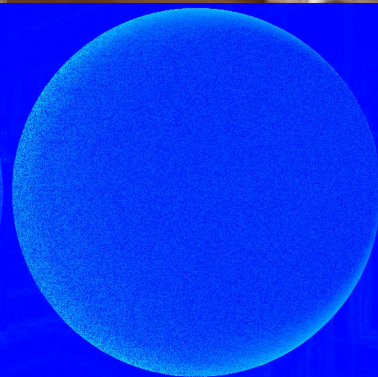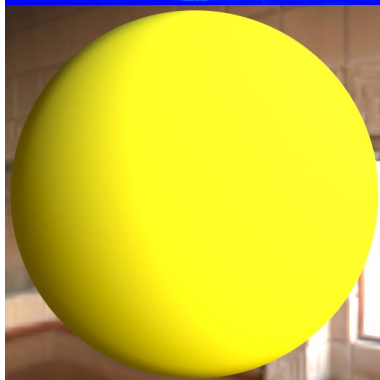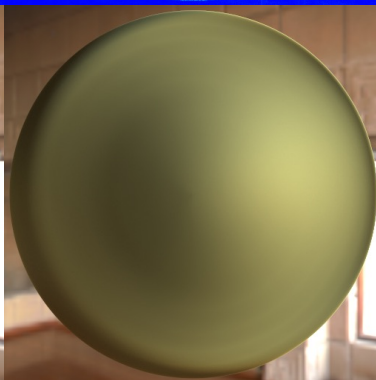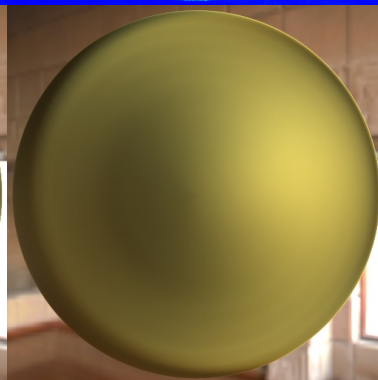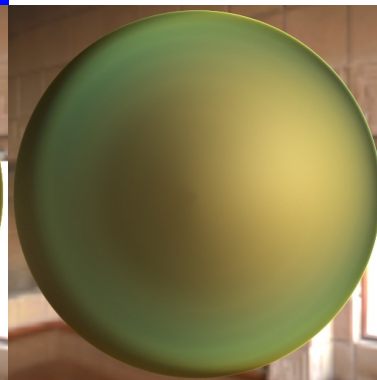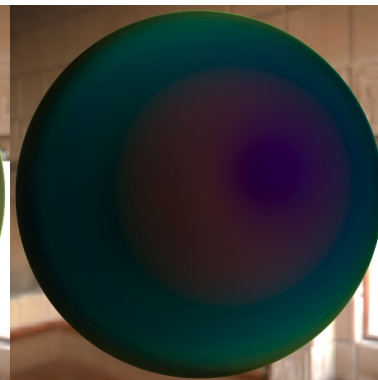

diffuse

sun18 spec.

Fresnel spec.

diffraction spec. diff. effect

# aurora\_white

ref

sun18

Fresnel

diffraction

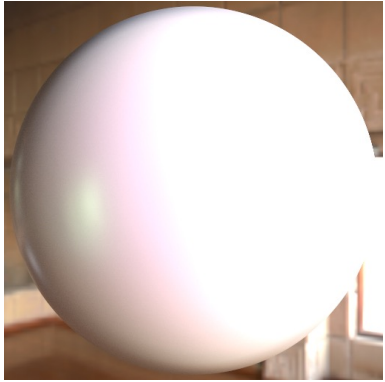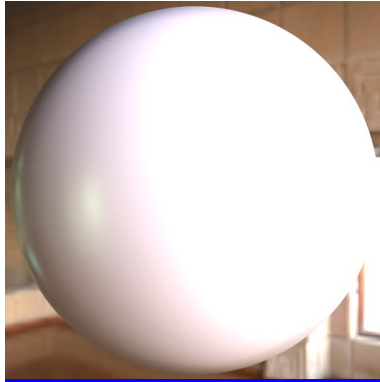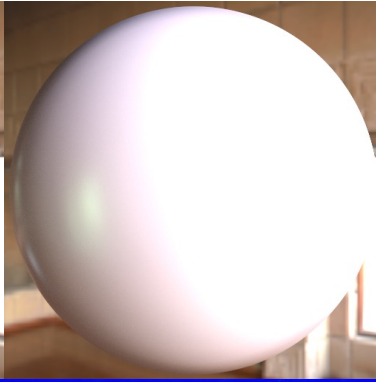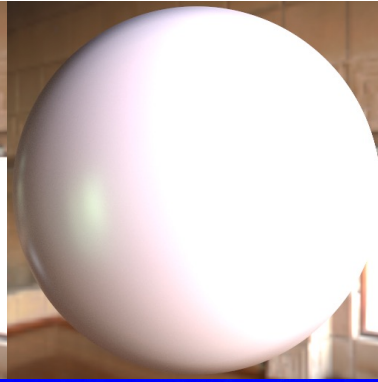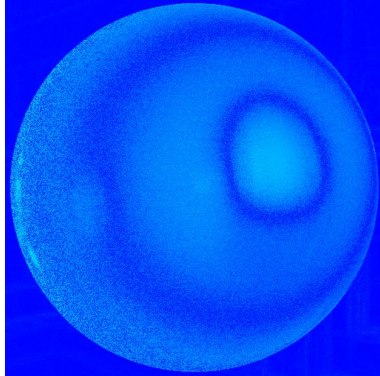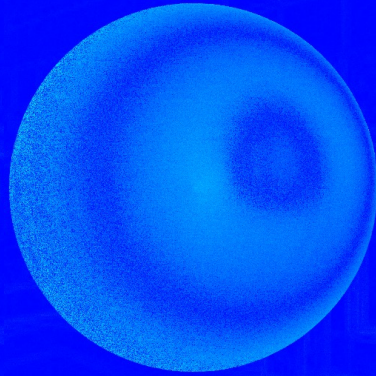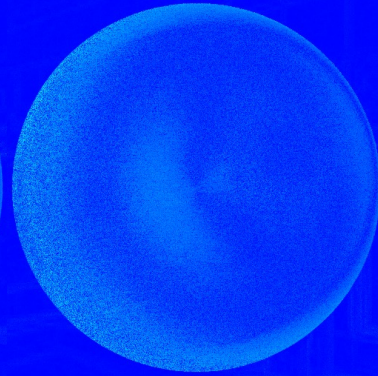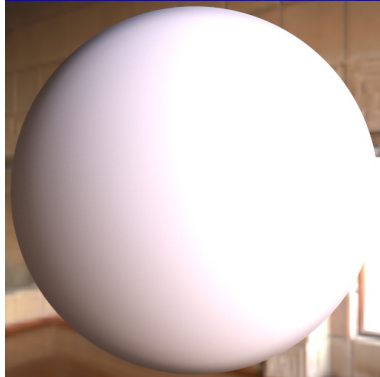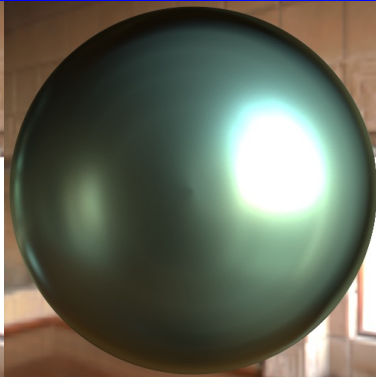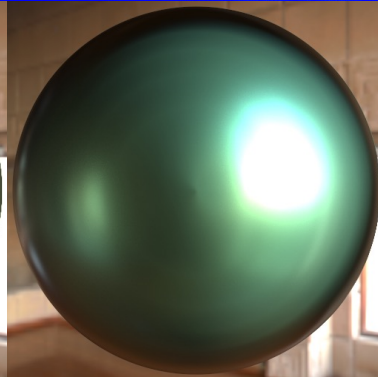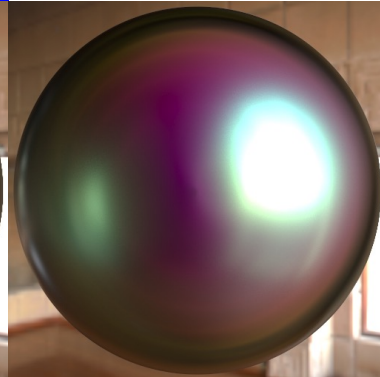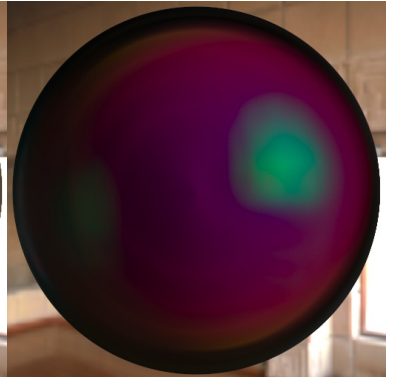

diffuse

sun18 spec.

Fresnel spec.

diffraction spec. diff. effect

# cardboard

ref

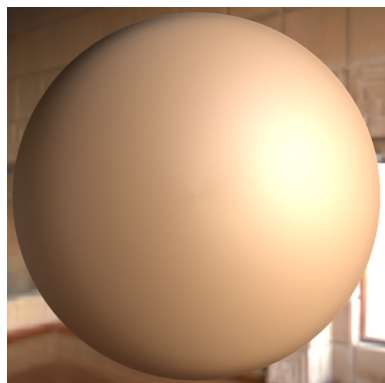

sun18

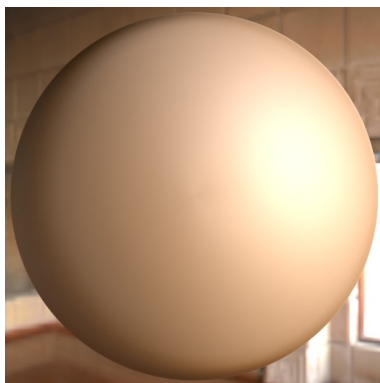

Fresnel

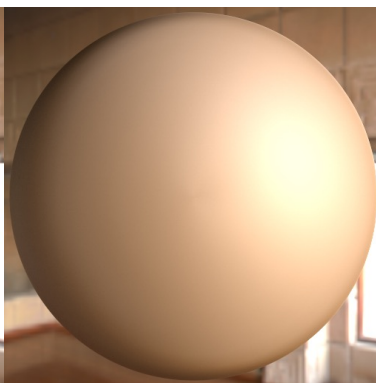

diffraction

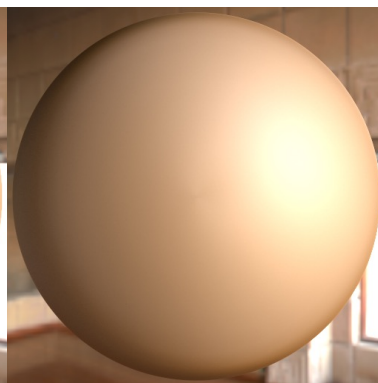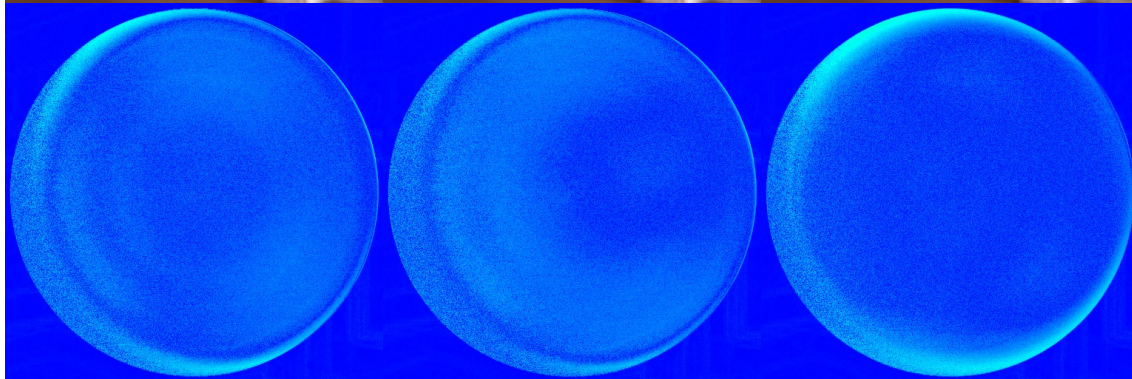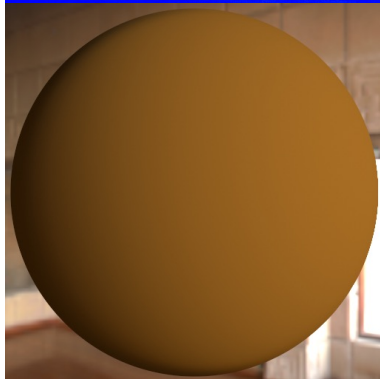

diffuse

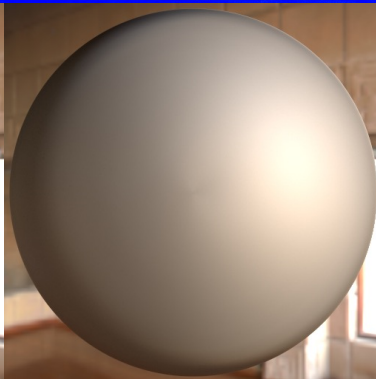

sun18 spec.

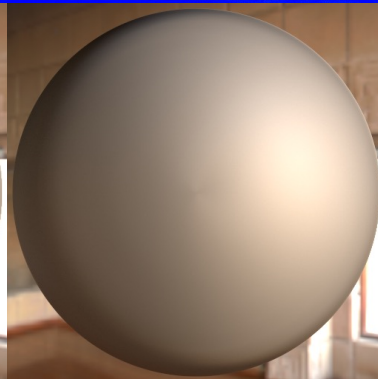

Fresnel spec.

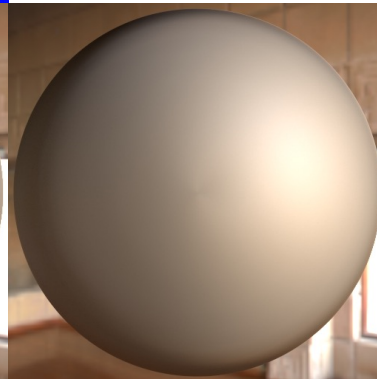

diffraction spec.

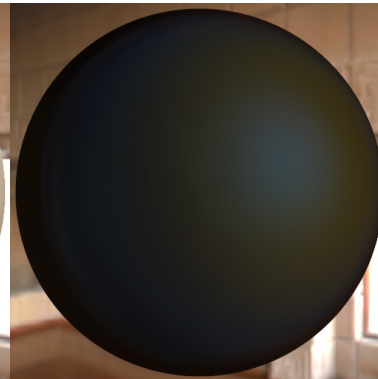

diff. effect

# cc\_amber\_citrine

ref

sun18

Fresnel

diffraction

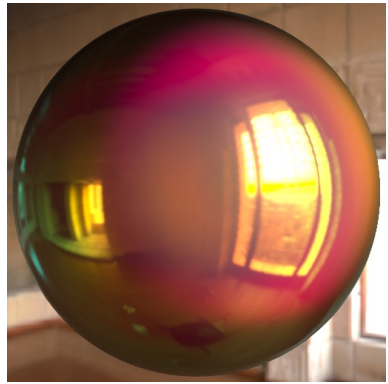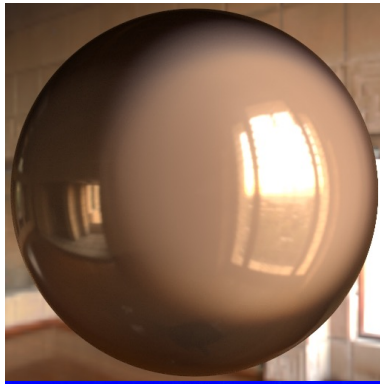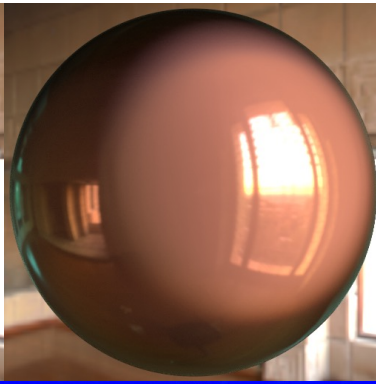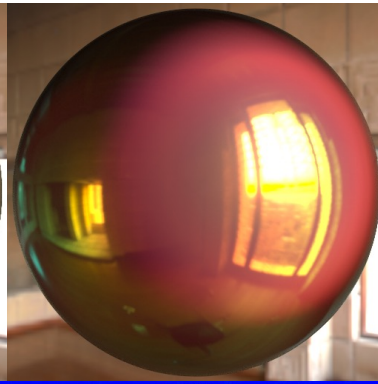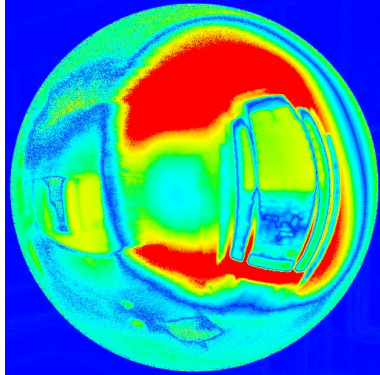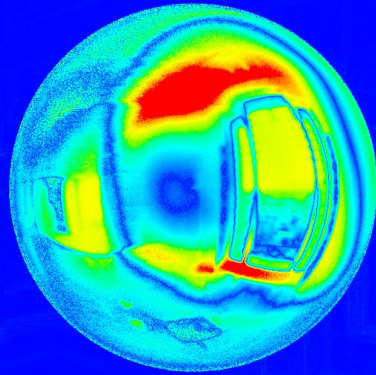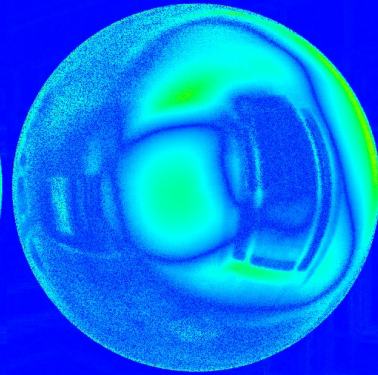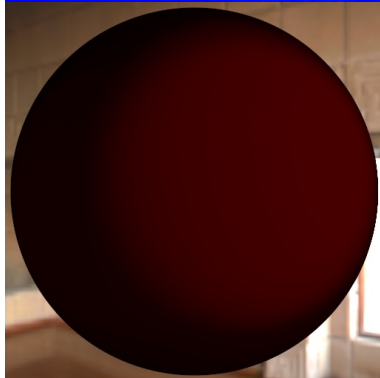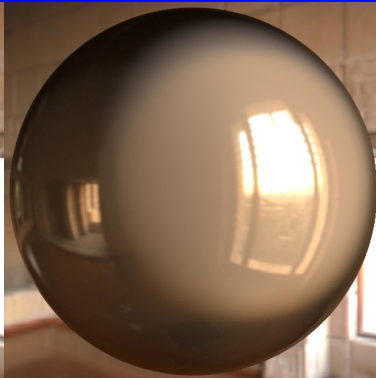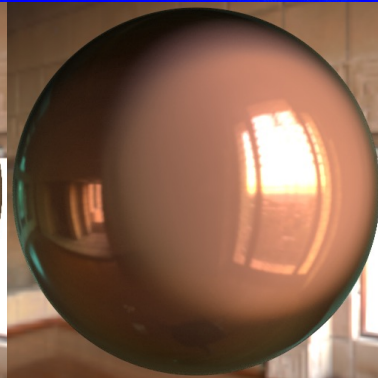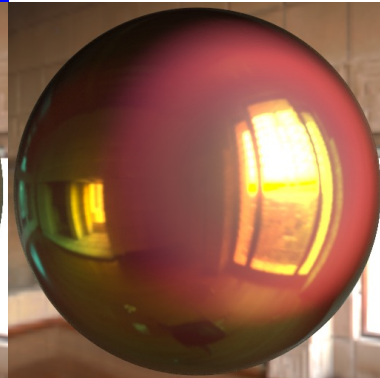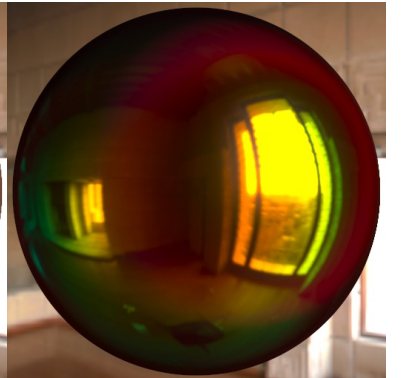

diffuse

sun18 spec.

Fresnel spec.

diffraction spec. diff. effect

# cc\_blue\_agat

ref

sun18

Fresnel

diffraction

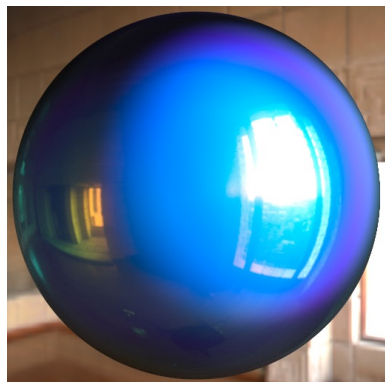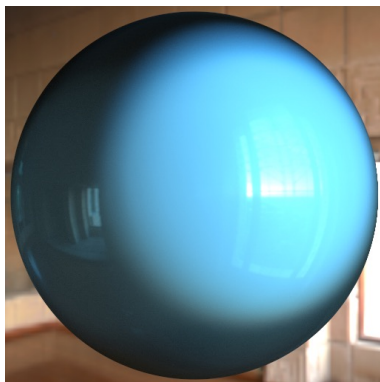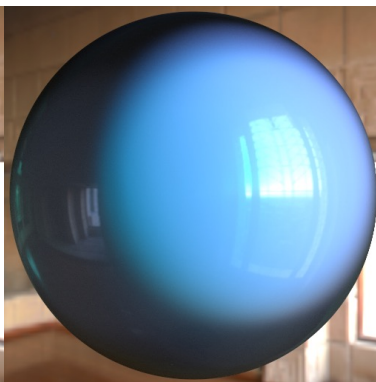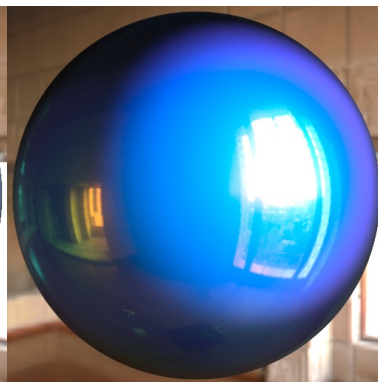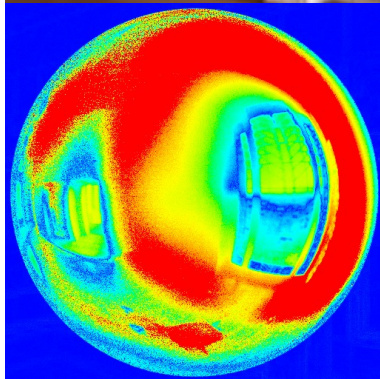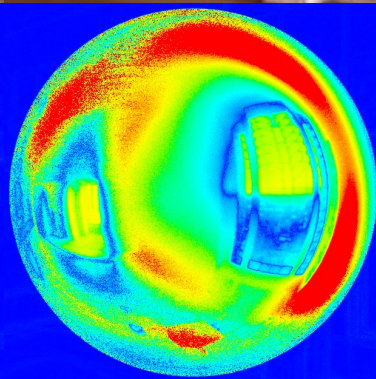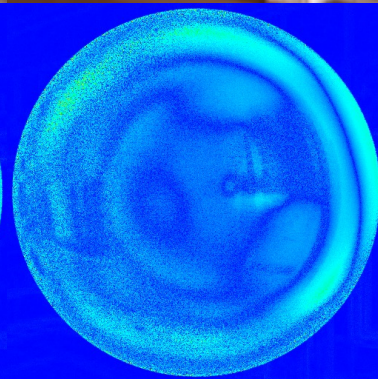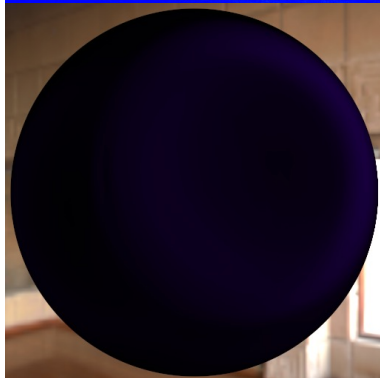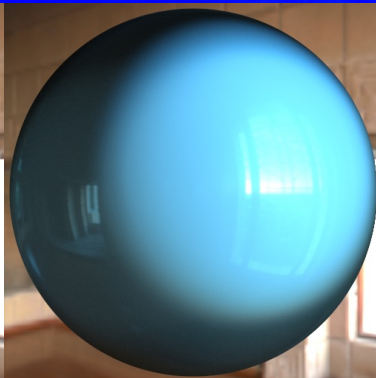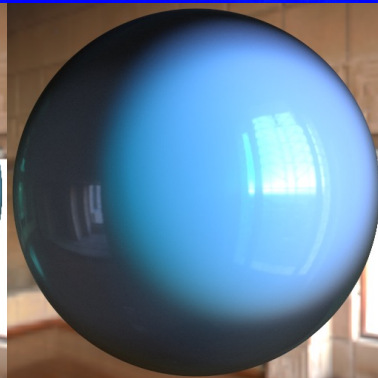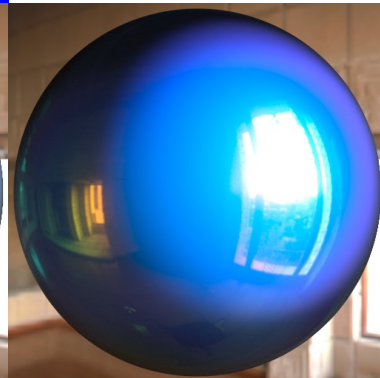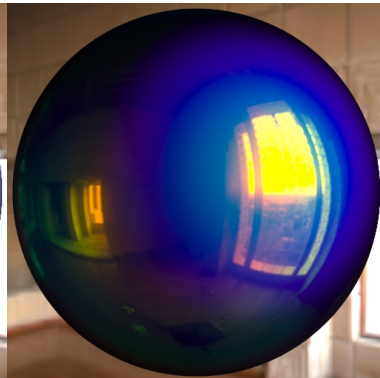

diffuse

sun18 spec.

Fresnel spec.

diffraction spec. diff. effect

# cc\_green\_malachite

ref

sun18

Fresnel

diffraction

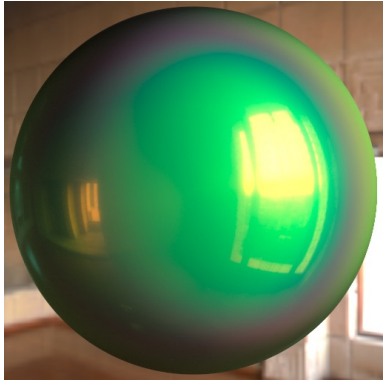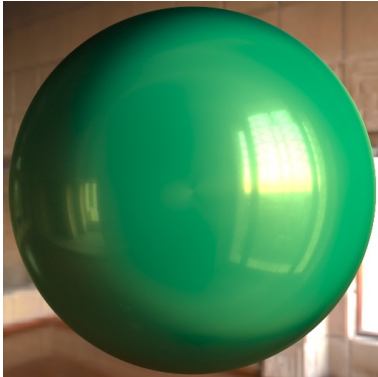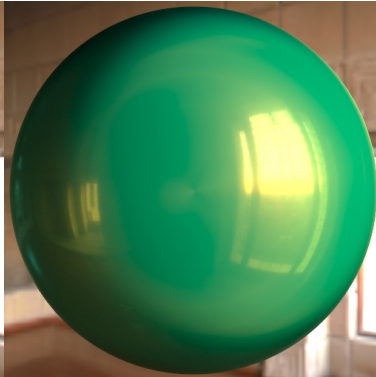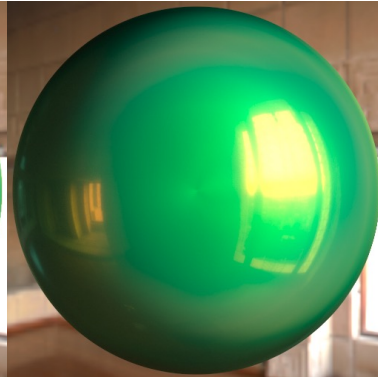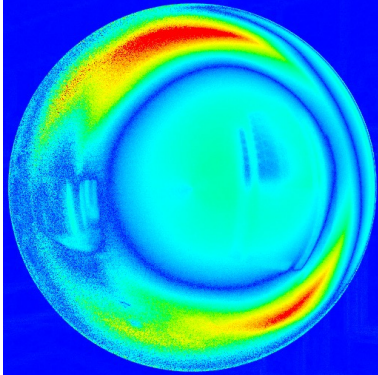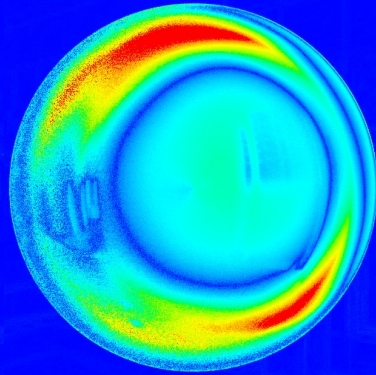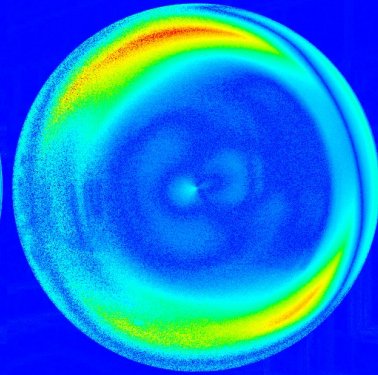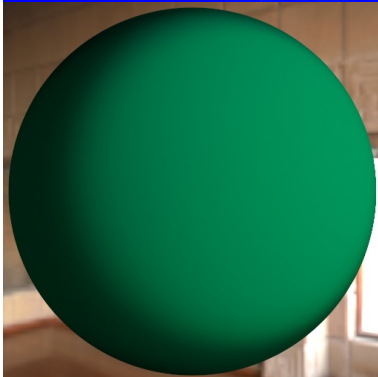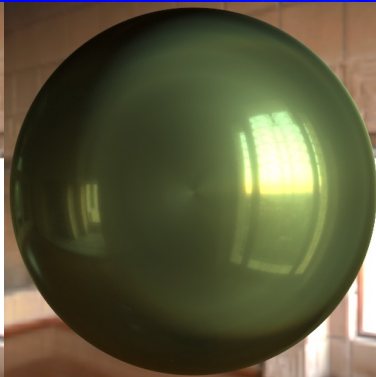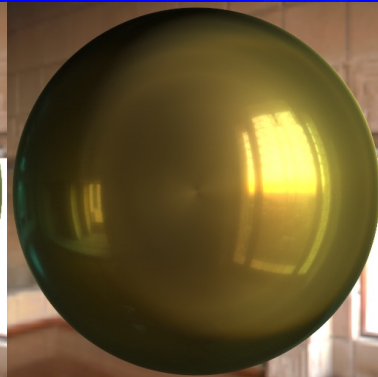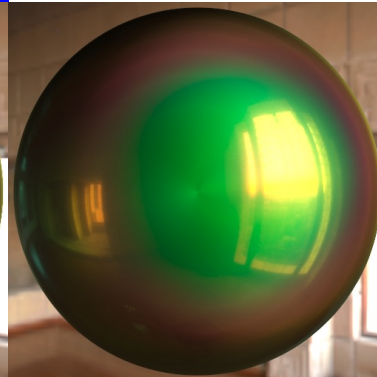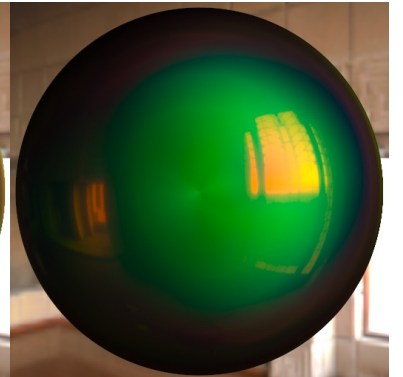

diffuse

sun18 spec.

Fresnel spec.

diffraction spec. diff. effect

# cc\_ibiza\_sunset

ref

sun18

Fresnel

diffraction

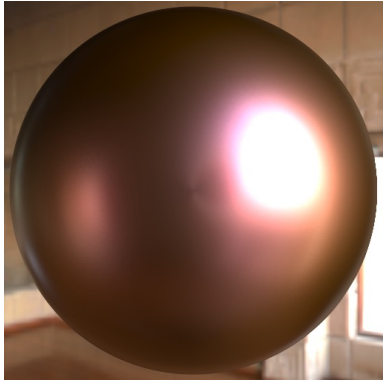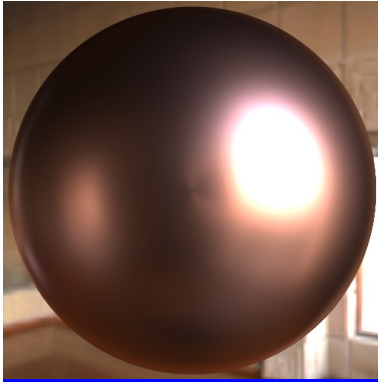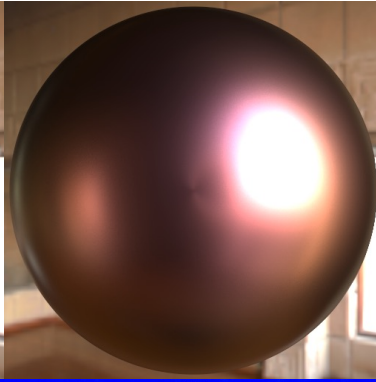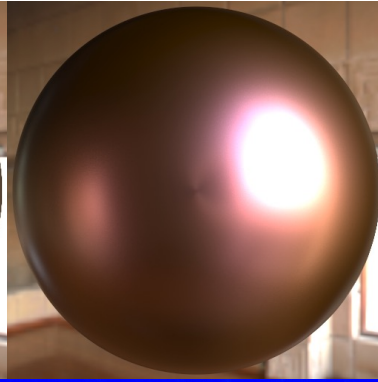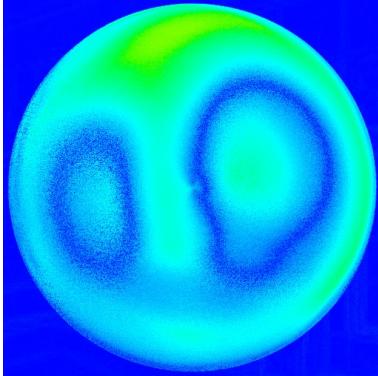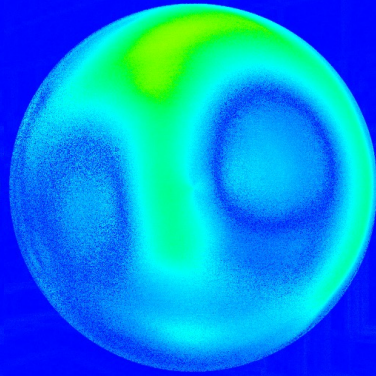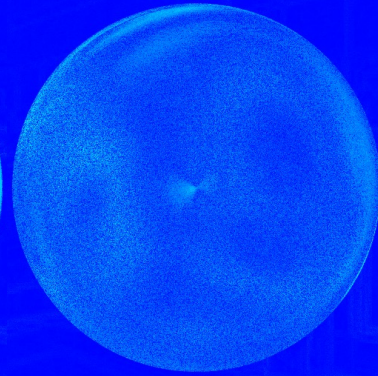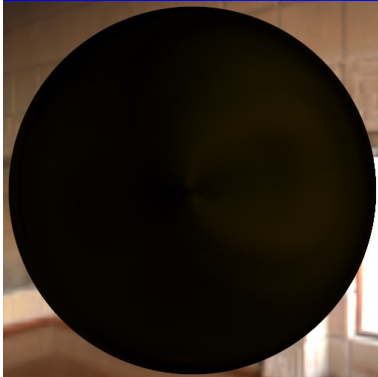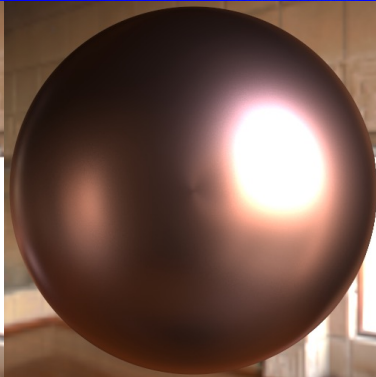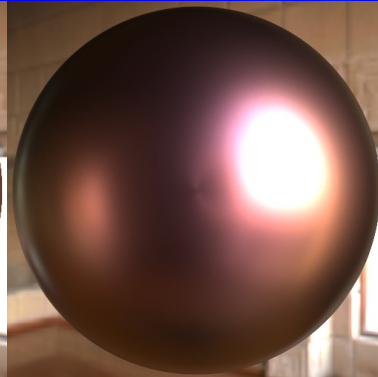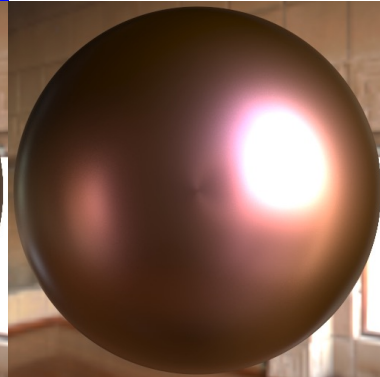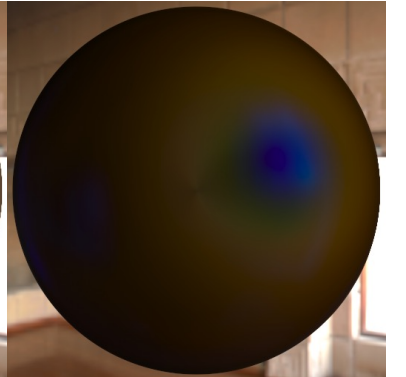

diffuse

sun18 spec.

Fresnel spec.

diffraction spec. diff. effect

# cc\_iris\_purple\_gem

ref

sun18

Fresnel

diffraction

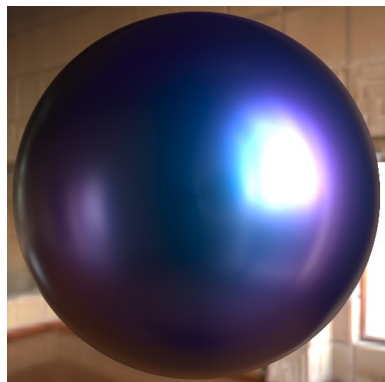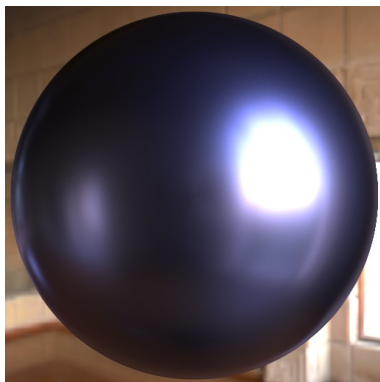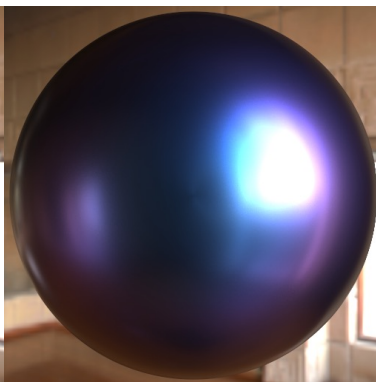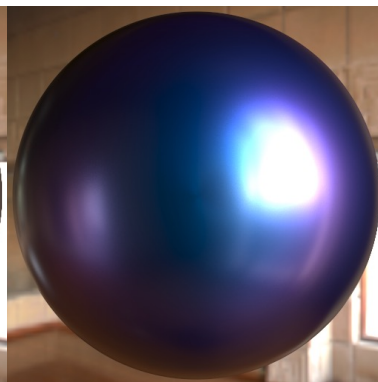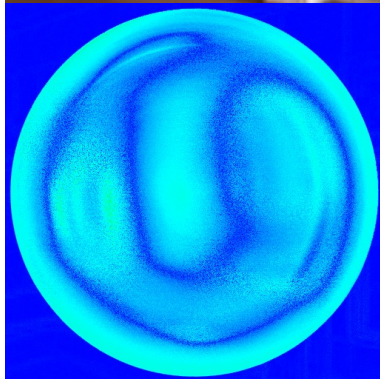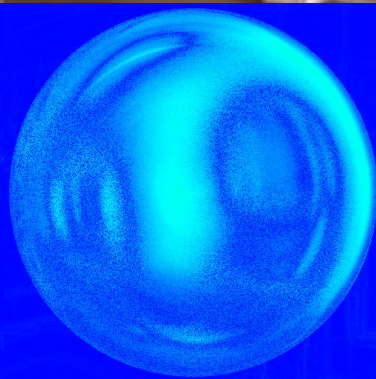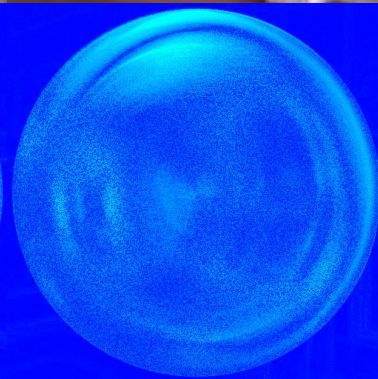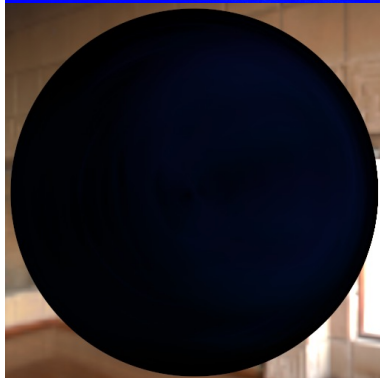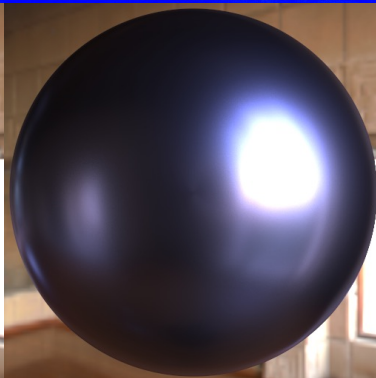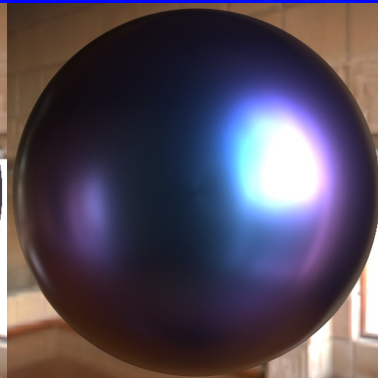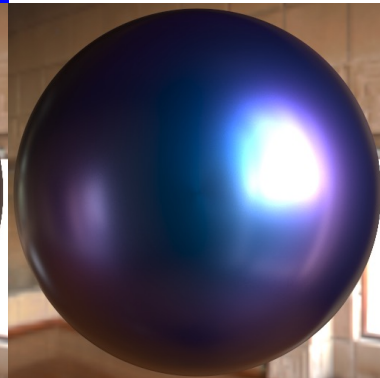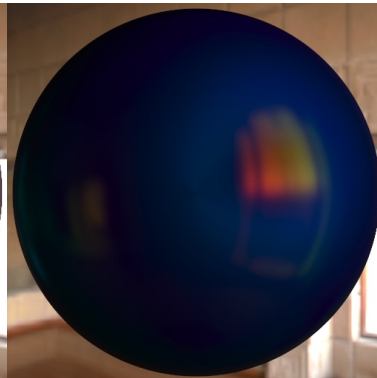

diffuse

sun18 spec.

Fresnel spec.

diffraction spec. diff. effect

# cc\_northern\_aurora

ref

sun18

Fresnel

diffraction

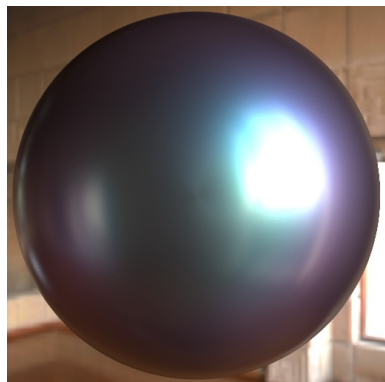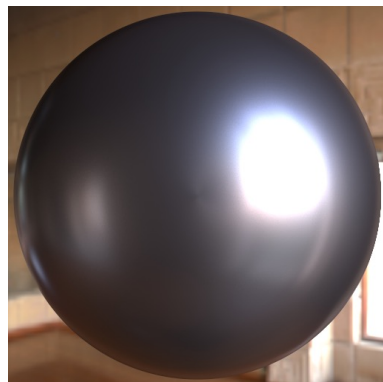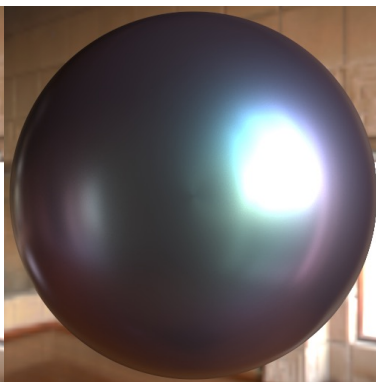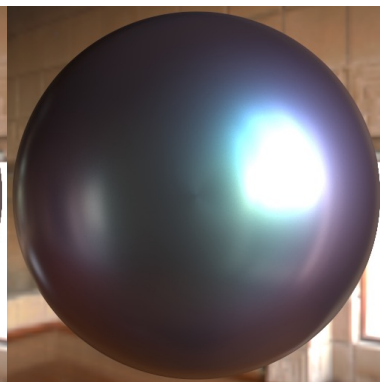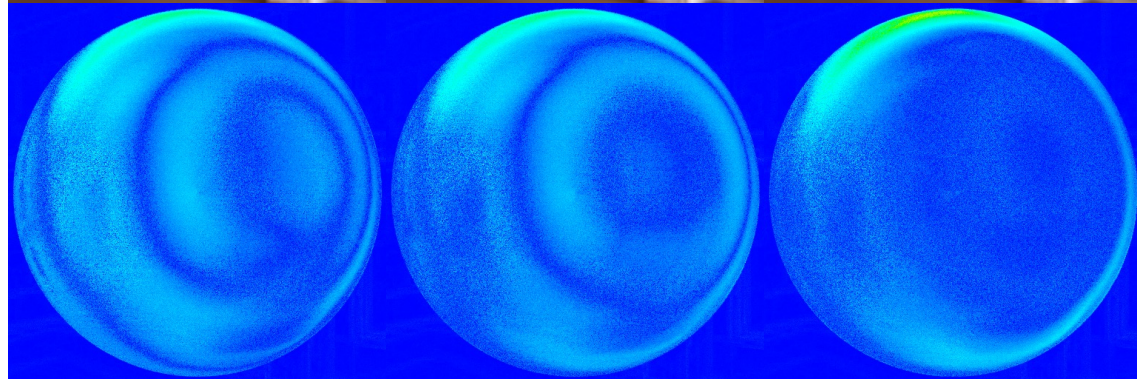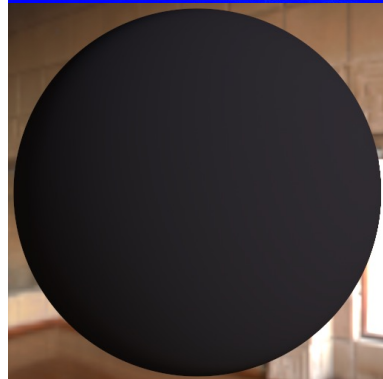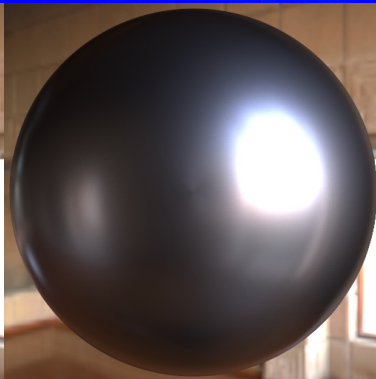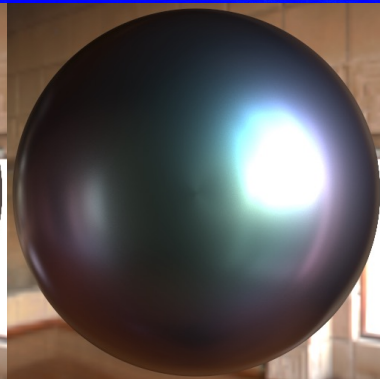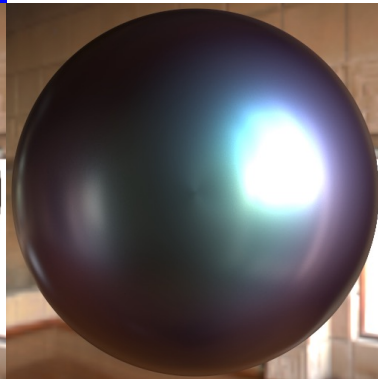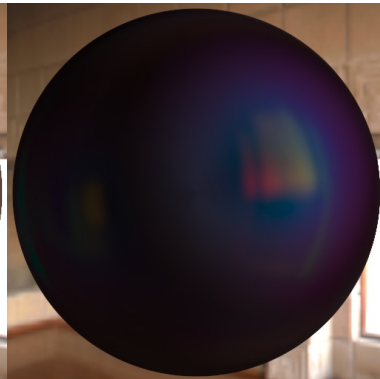

diffuse

sun18 spec.

Fresnel spec.

diffraction spec. diff. effect

# cg\_sunflower

ref

sun18

Fresnel

diffraction

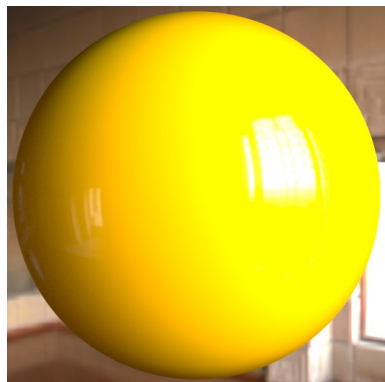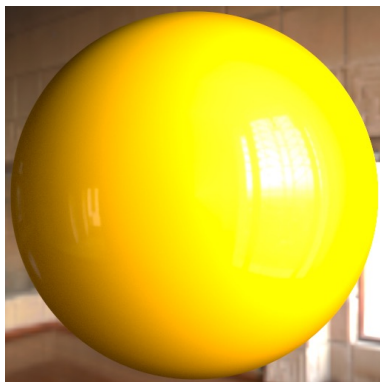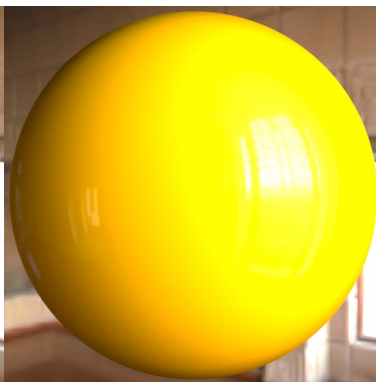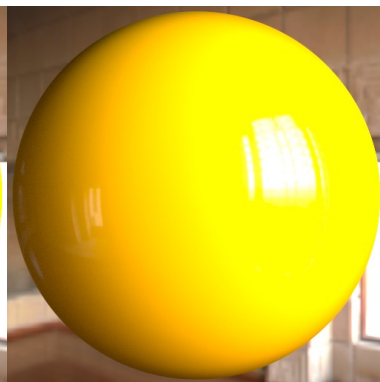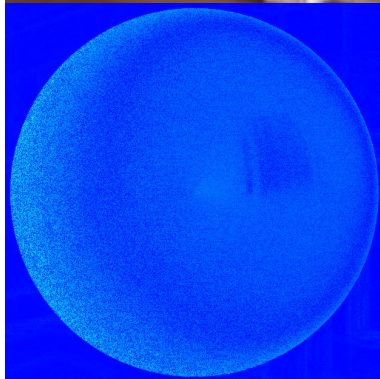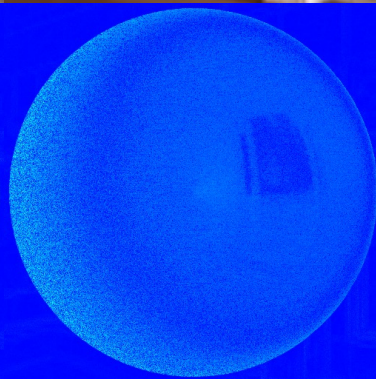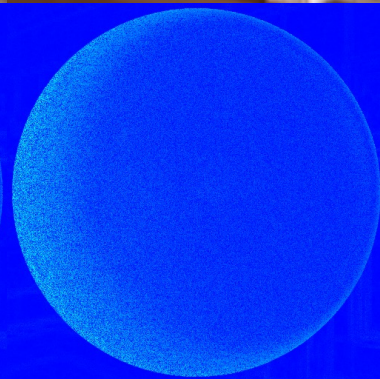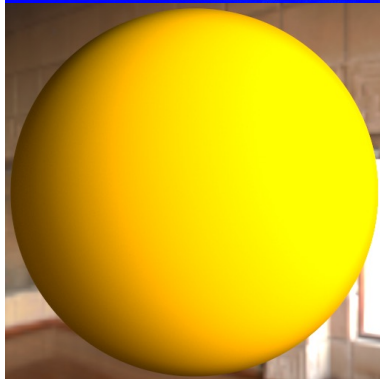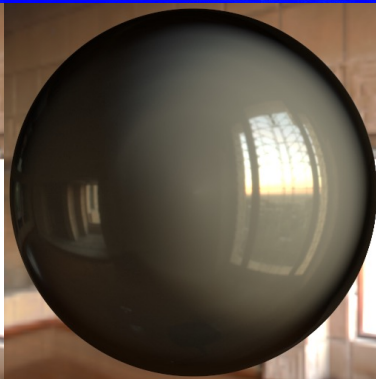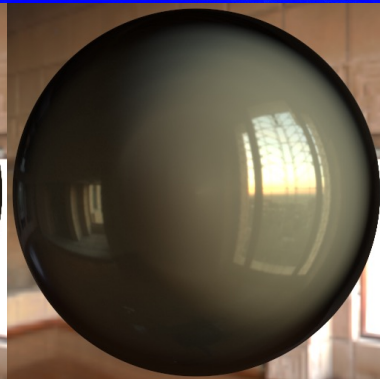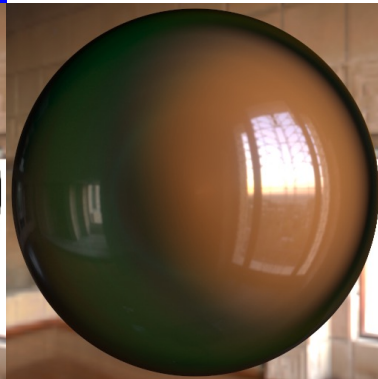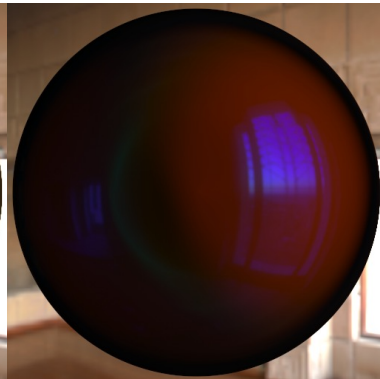

diffuse

sun18 spec.

Fresnel spec.

diffraction spec. diff. effect

# chm\_light\_blue

ref

sun18

Fresnel

diffraction

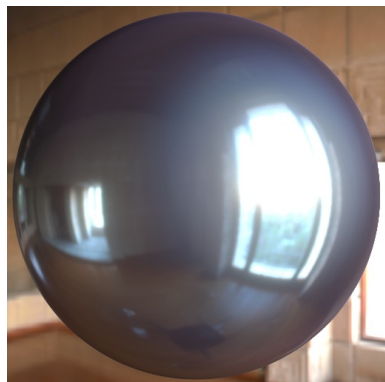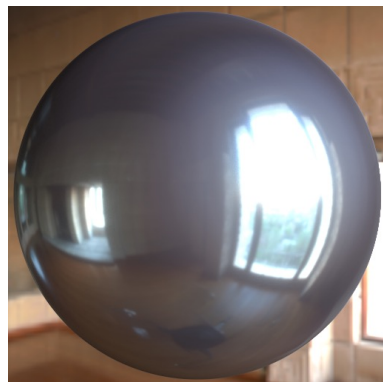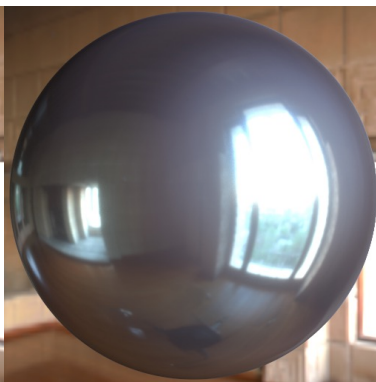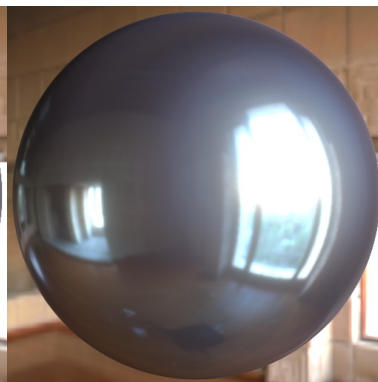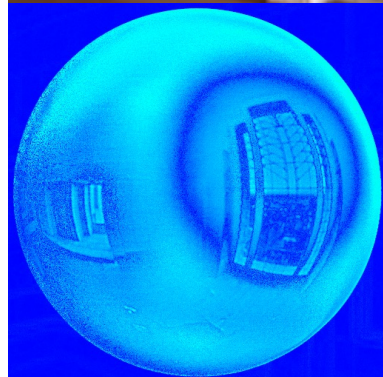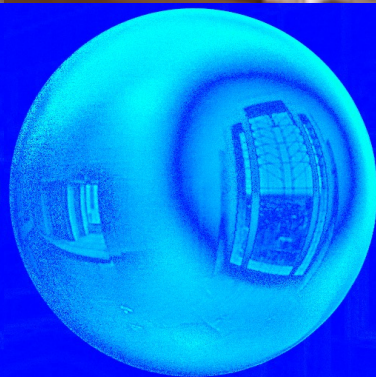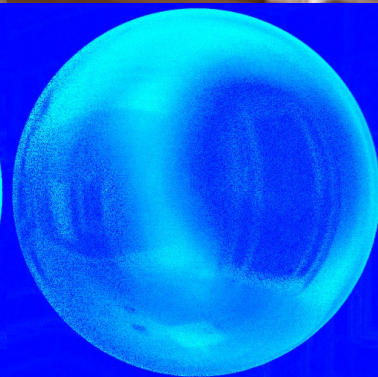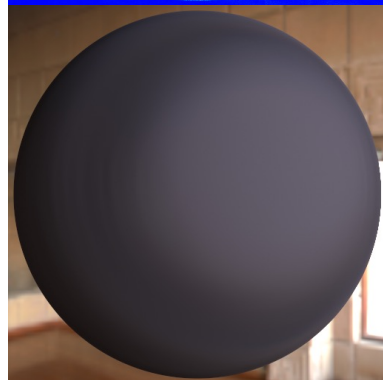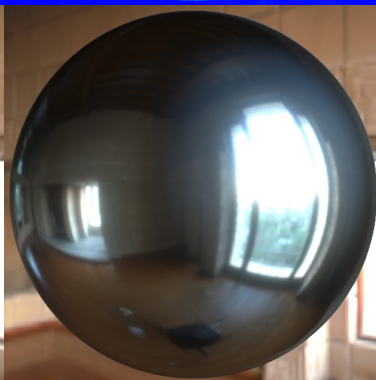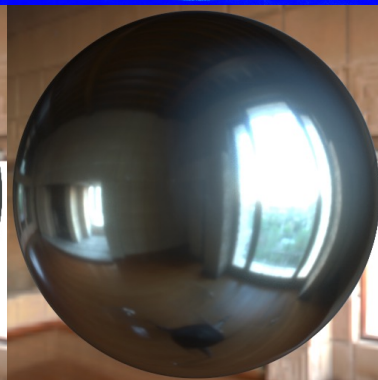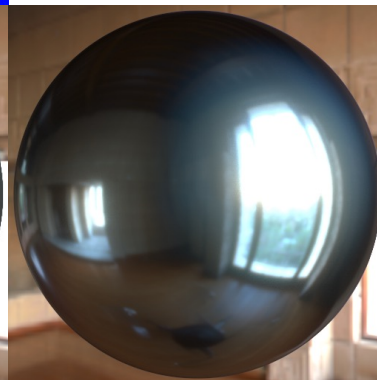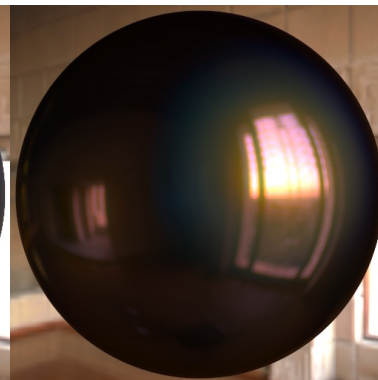

diffuse

sun18 spec.

Fresnel spec.

diffraction spec. diff. effect

# chm\_mint

ref

sun18

Fresnel

diffraction

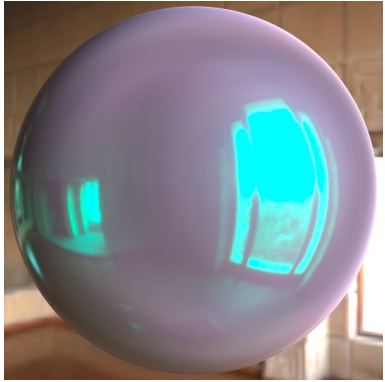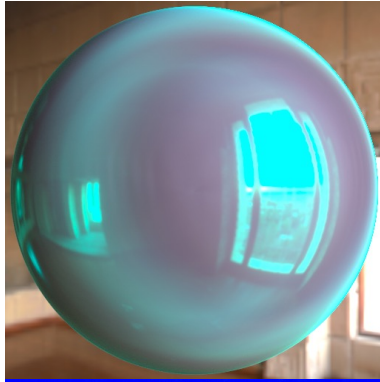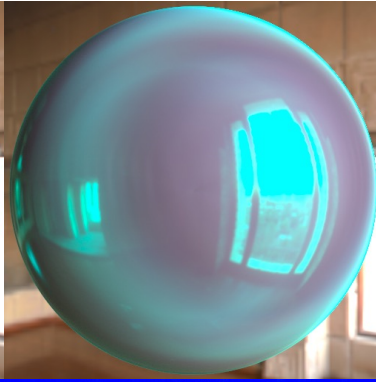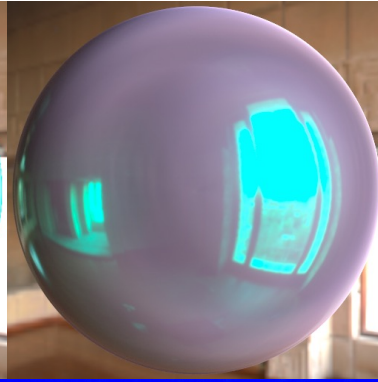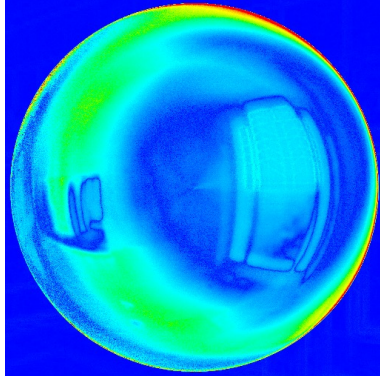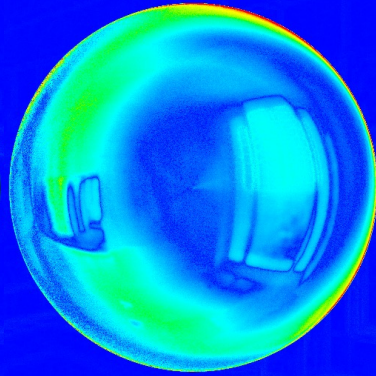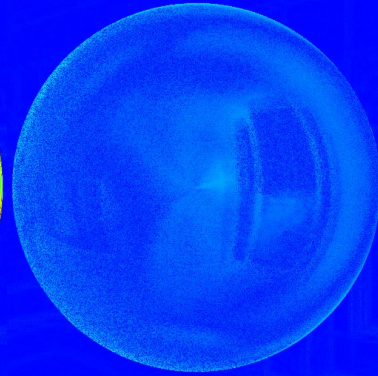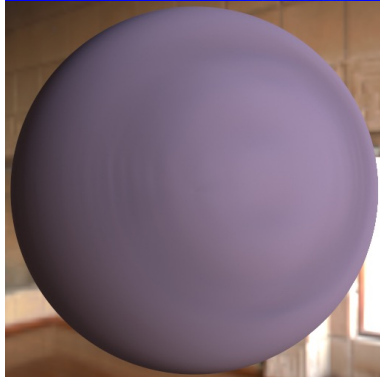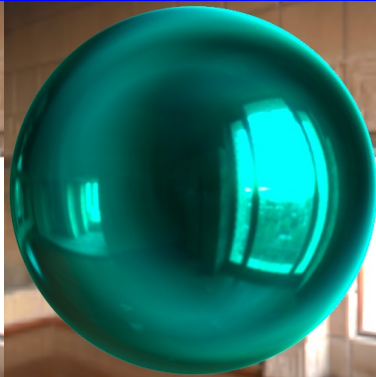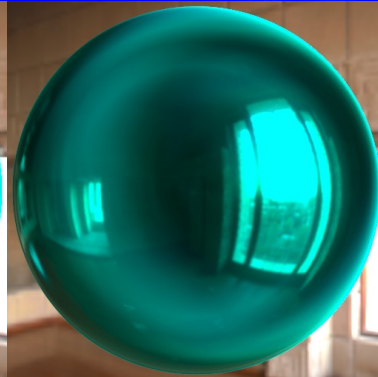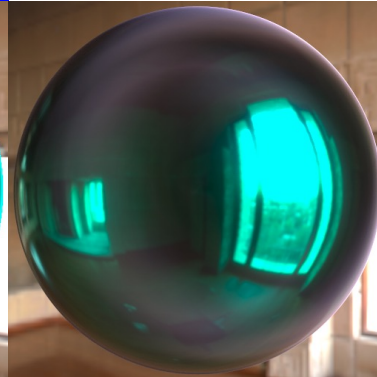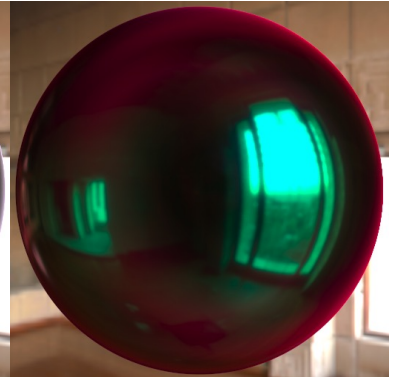

diffuse

sun18 spec.

Fresnel spec.

diffraction spec. diff. effect

# chm\_orange

ref

sun18

Fresnel

diffraction

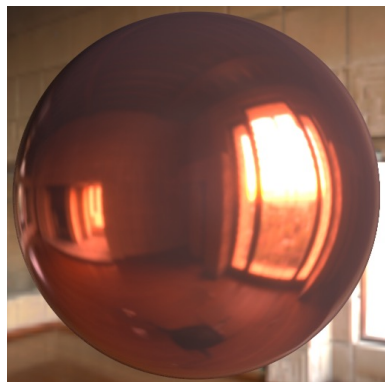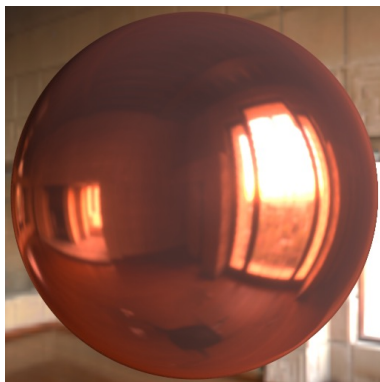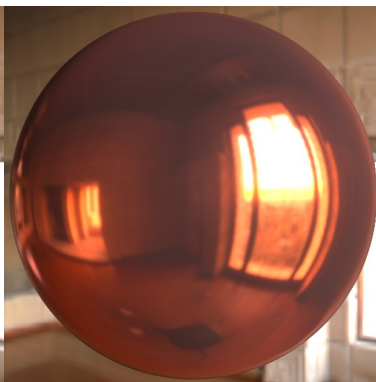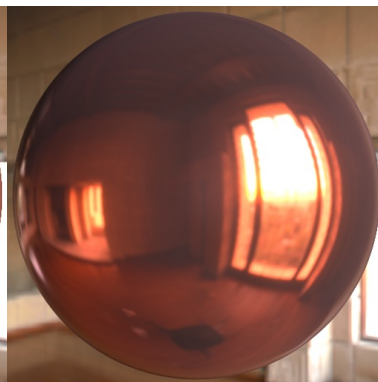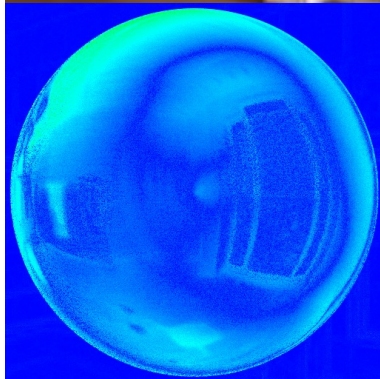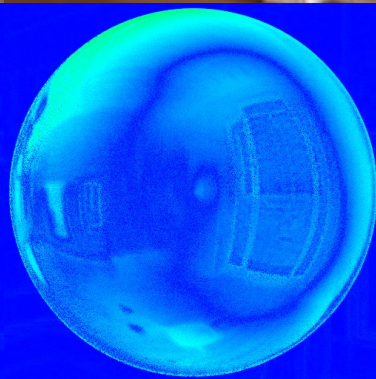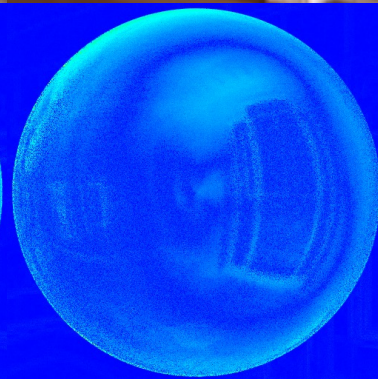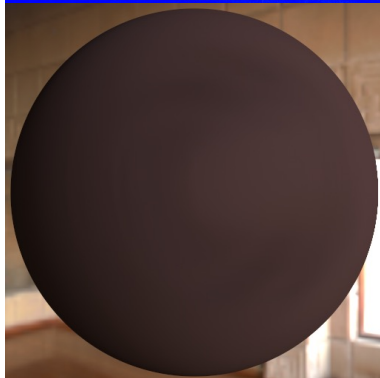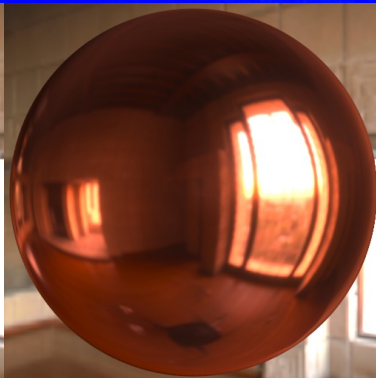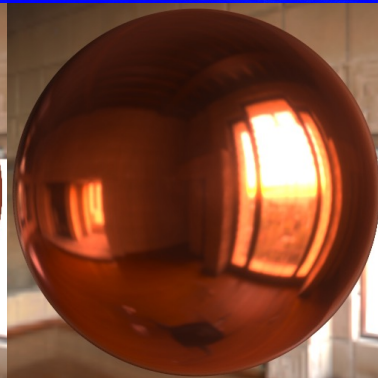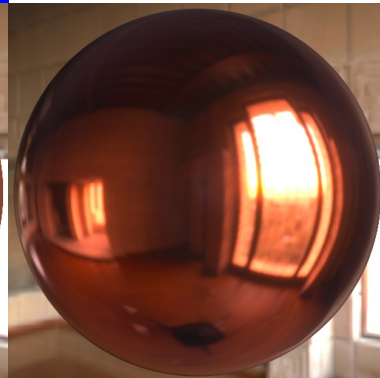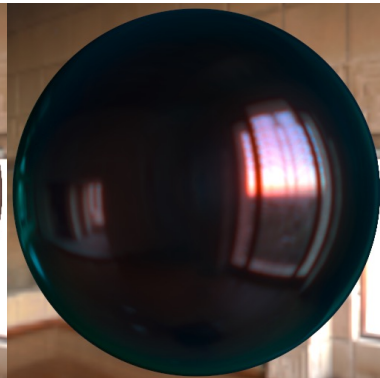

diffuse

sun18 spec.

Fresnel spec.

diffraction spec. diff. effect

# cm\_military\_green

ref

sun18

Fresnel

diffraction

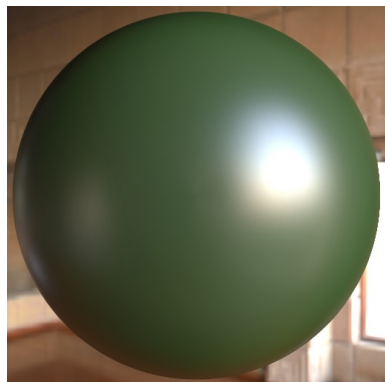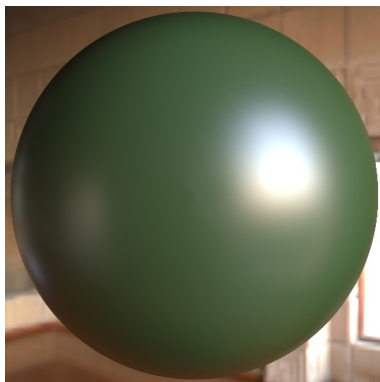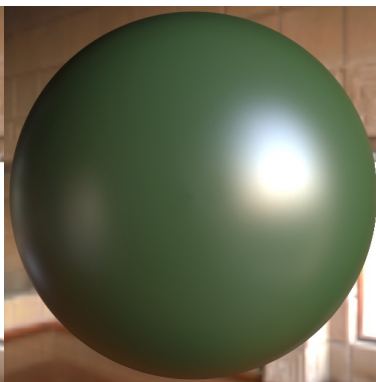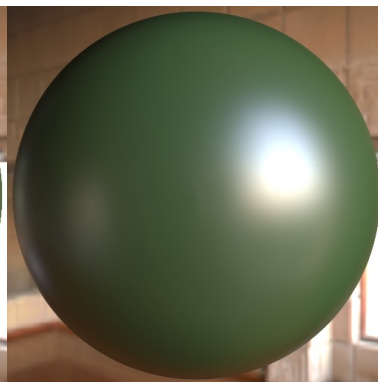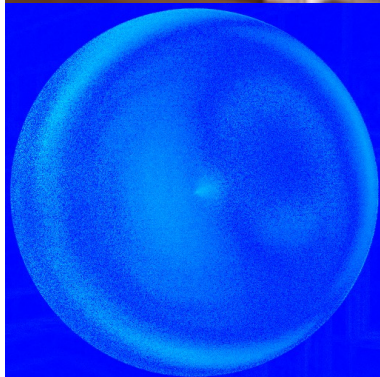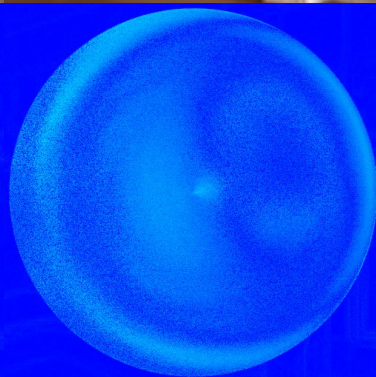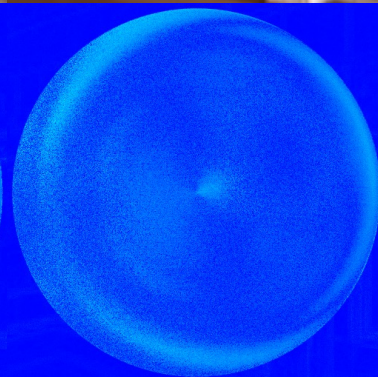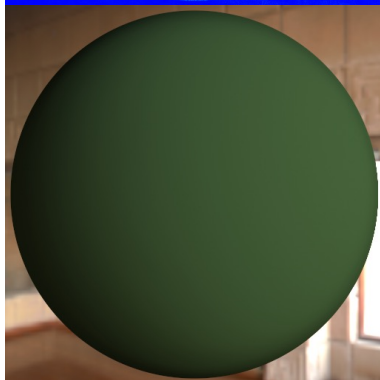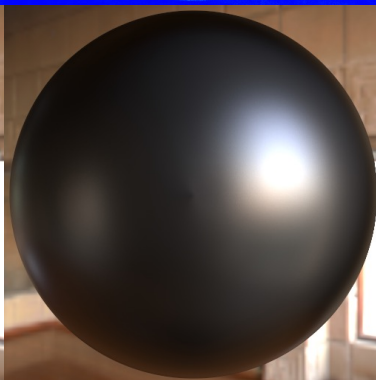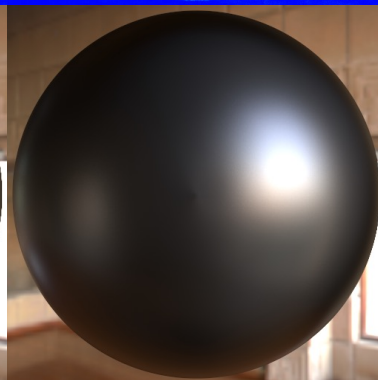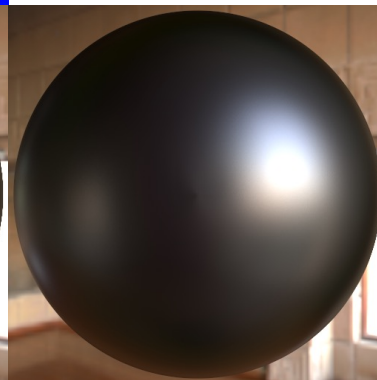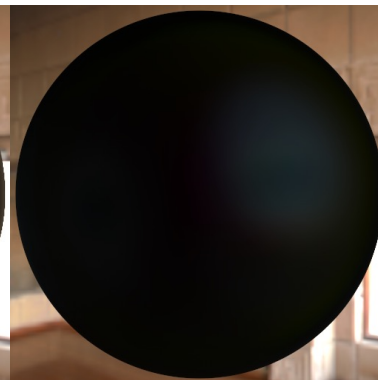

diffuse

sun18 spec.

Fresnel spec.

diffraction spec. diff. effect

# cm\_toxic\_green

ref

sun18

Fresnel

diffraction

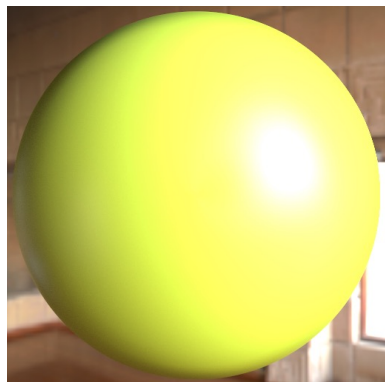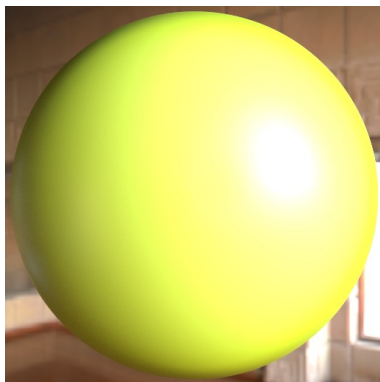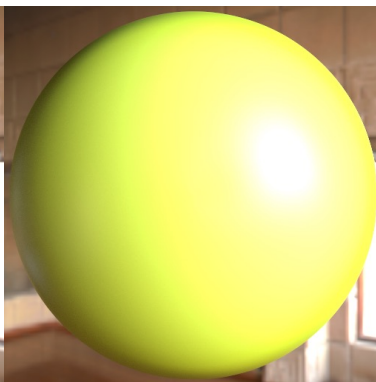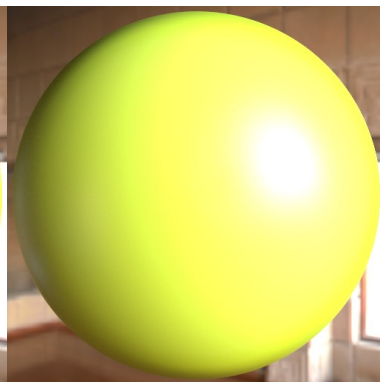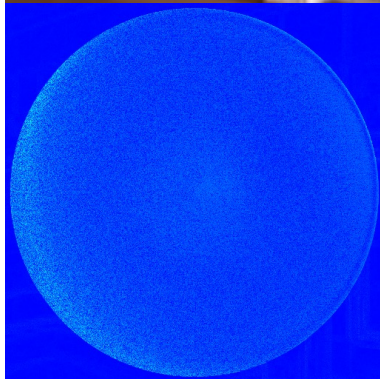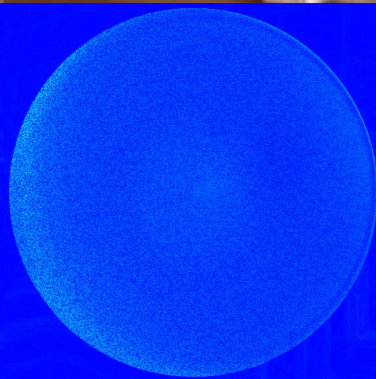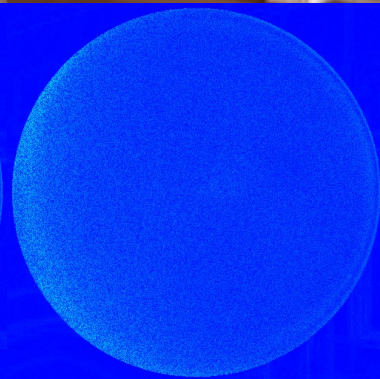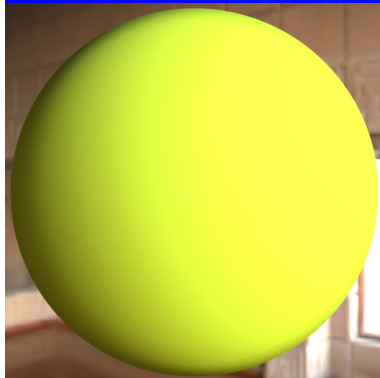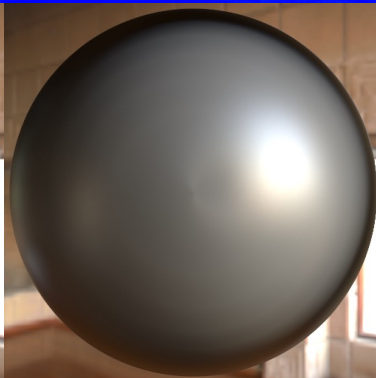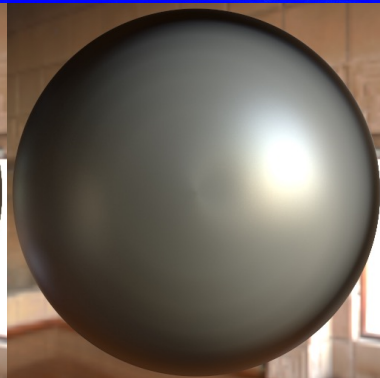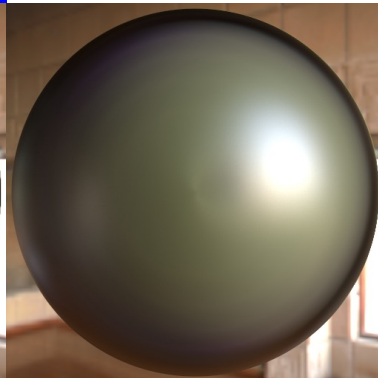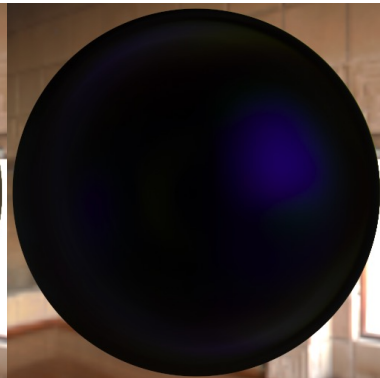

diffuse

sun18 spec.

Fresnel spec.

diffraction spec. diff. effect

# cm\_white

ref

sun18

Fresnel

diffraction

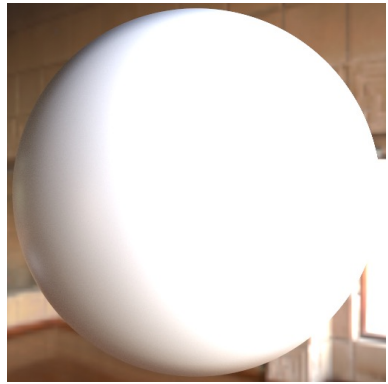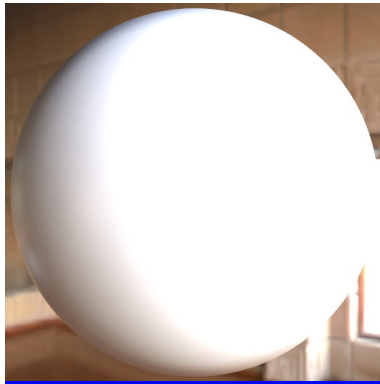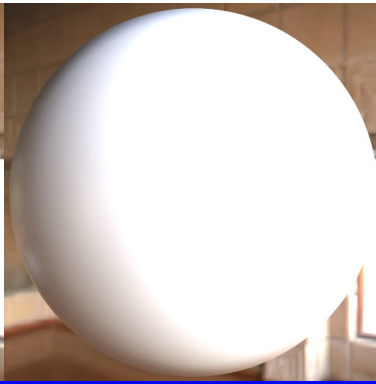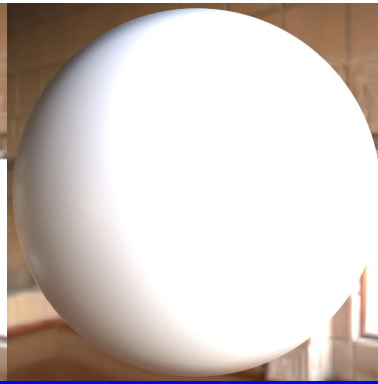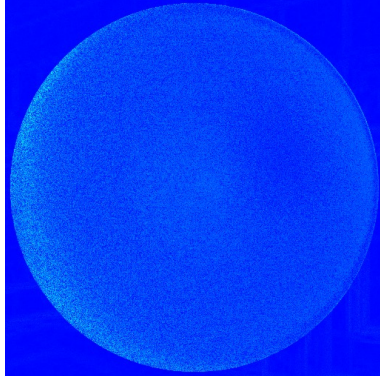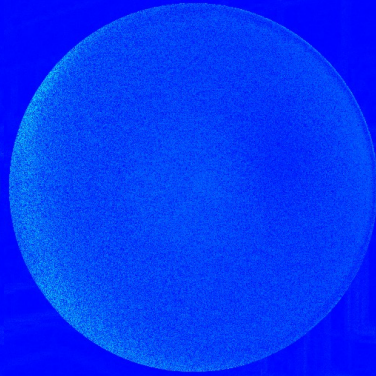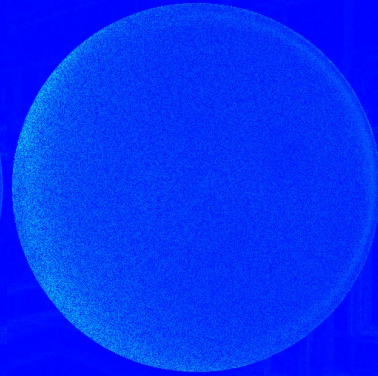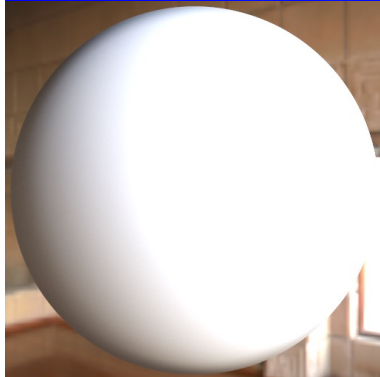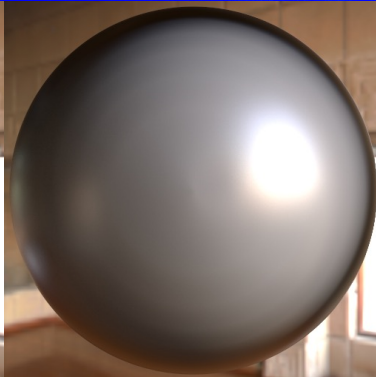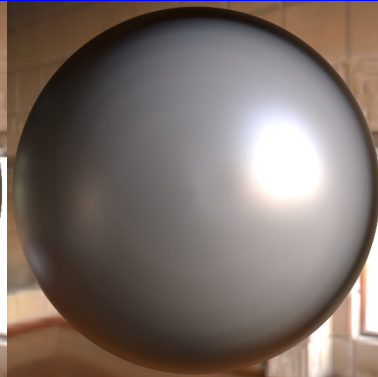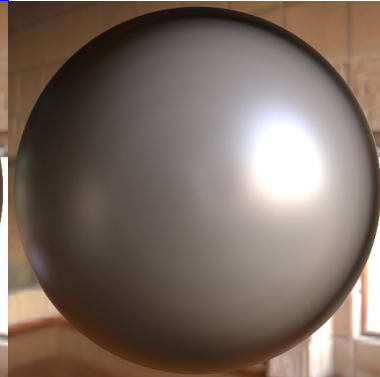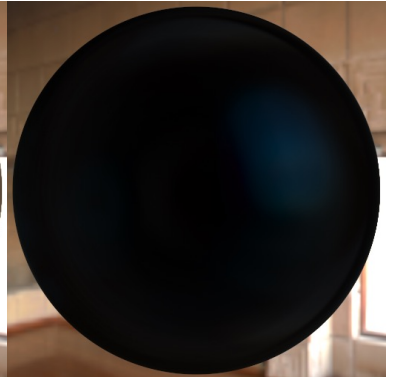

diffuse

sun18 spec.

Fresnel spec.

diffraction spec. diff. effect

# colodur\_azure\_4e

ref

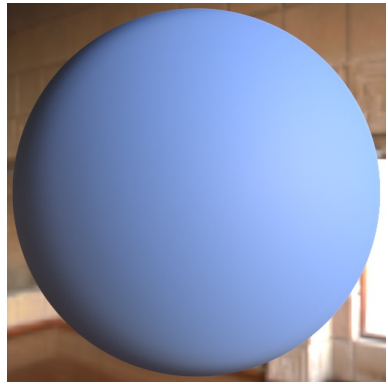

sun18

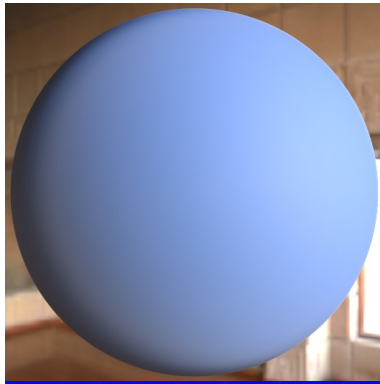

Fresnel

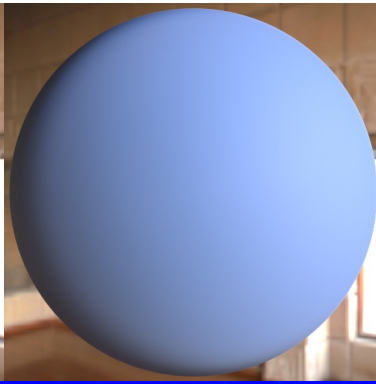

diffraction

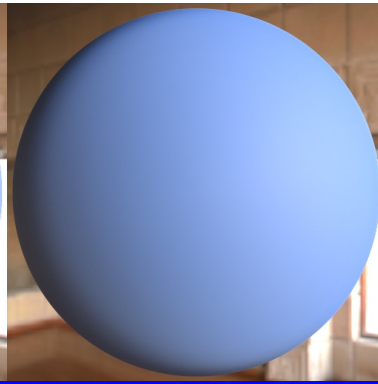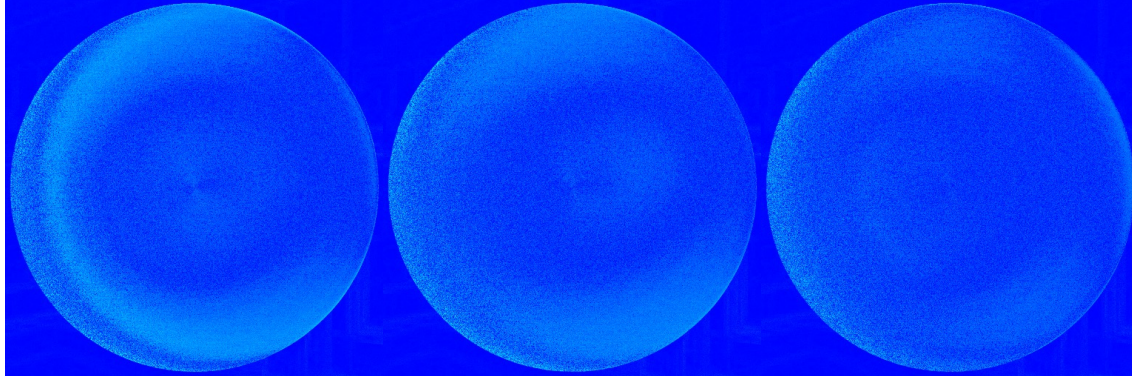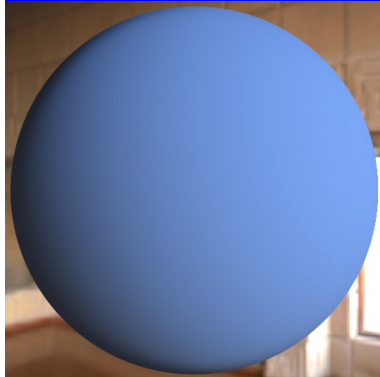

diffuse

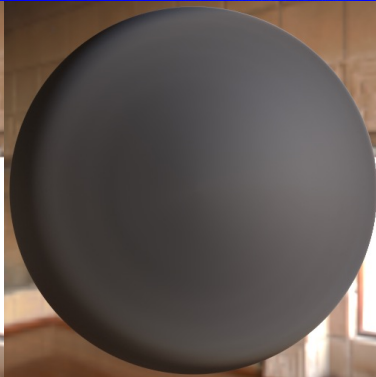

sun18 spec.

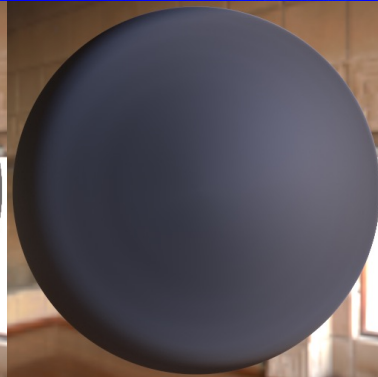

Fresnel spec.

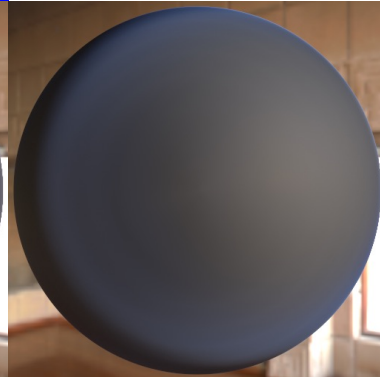

diffraction spec.

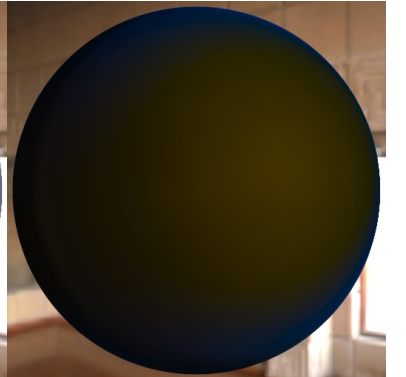

diff. effect

# colodur\_connemara\_4c

ref

sun18

Fresnel

diffraction

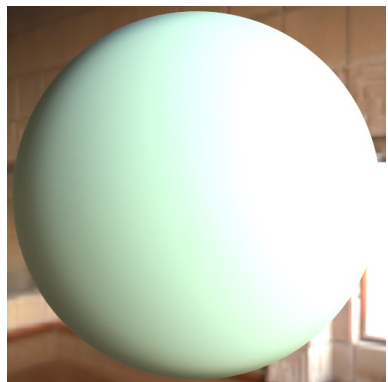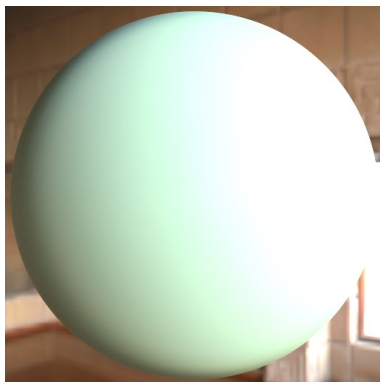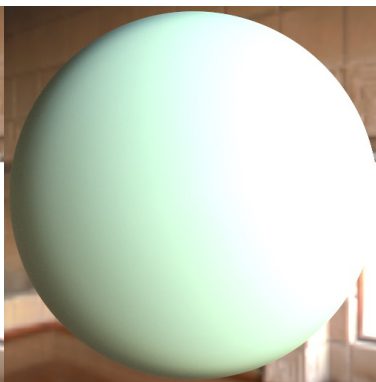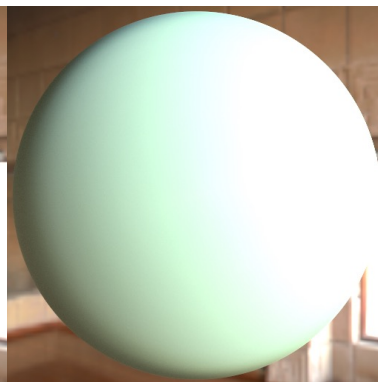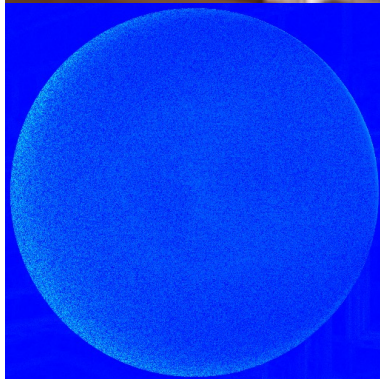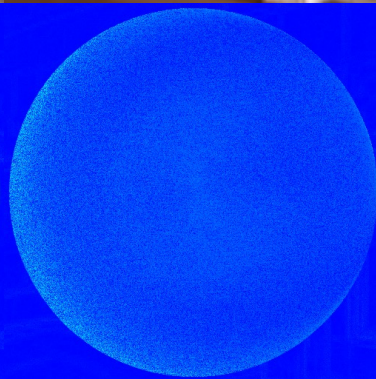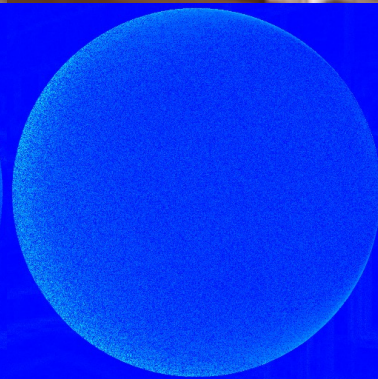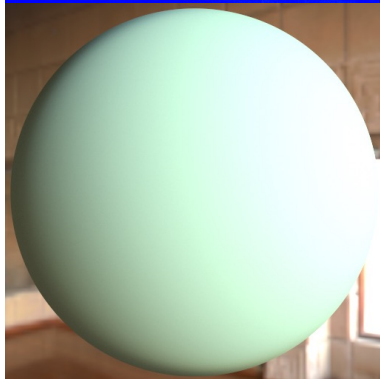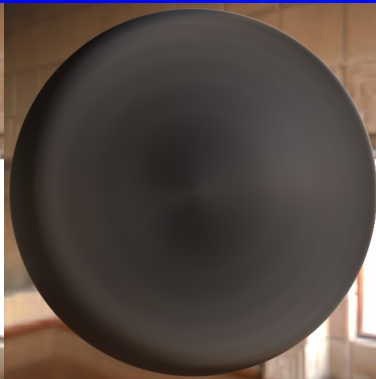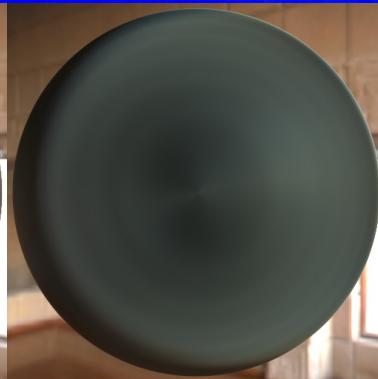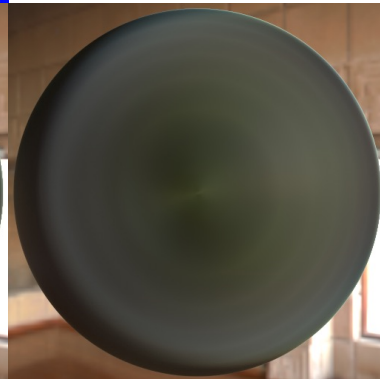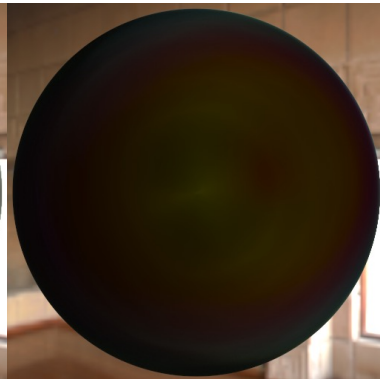

diffuse

sun18 spec.

Fresnel spec.

diffraction spec. diff. effect

# colodur\_kalahari\_2a

ref

sun18

Fresnel

diffraction

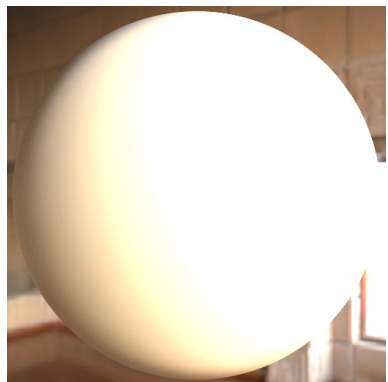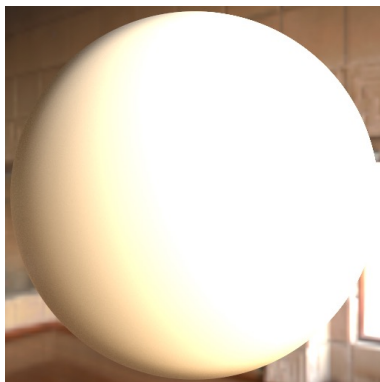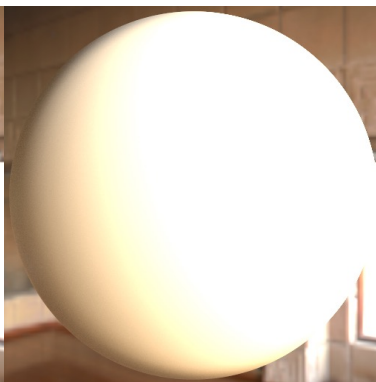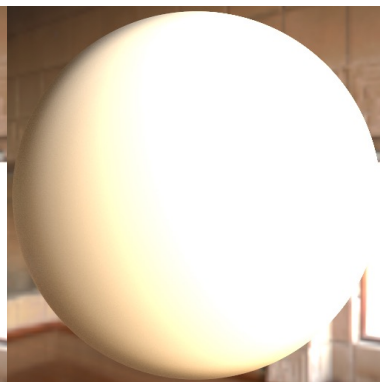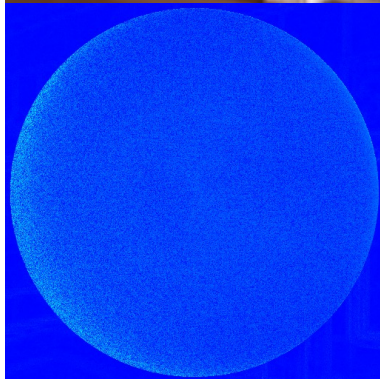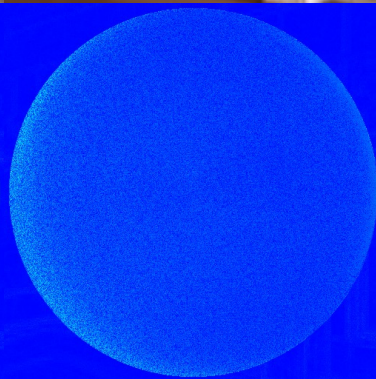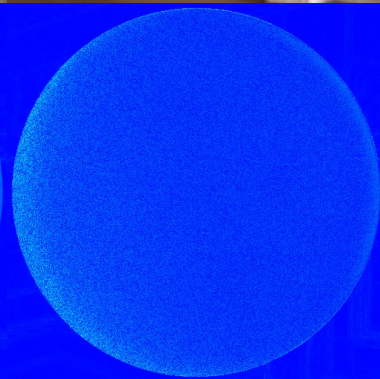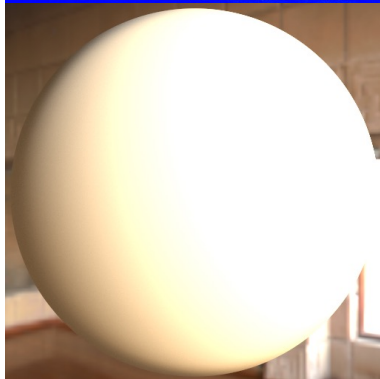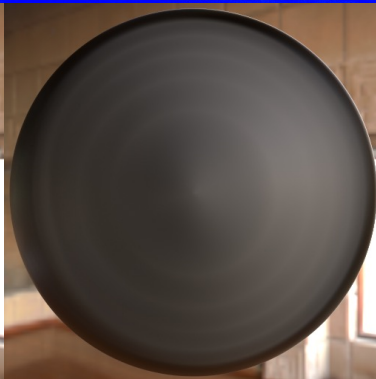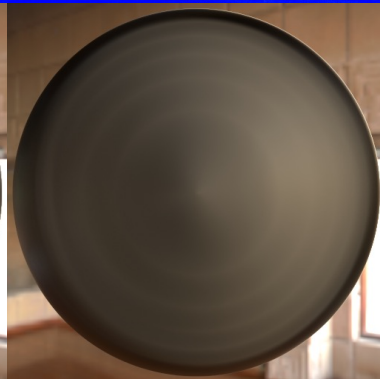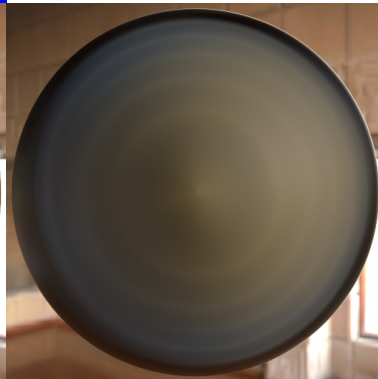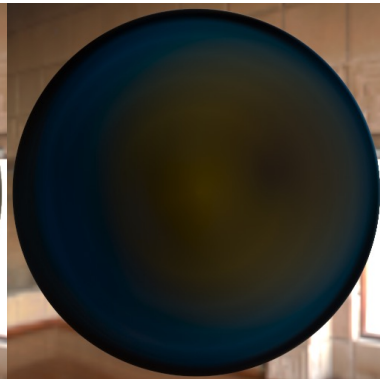

diffuse

sun18 spec.

Fresnel spec.

diffraction spec. diff. effect

# colodur\_napoli\_4f

ref

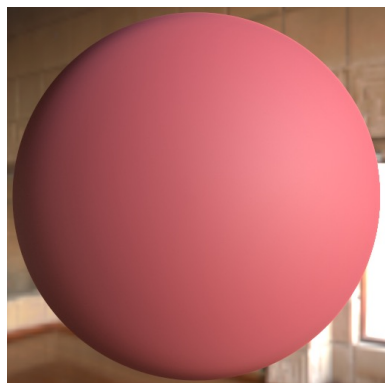

sun18

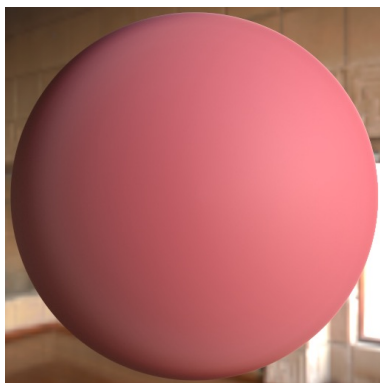

Fresnel

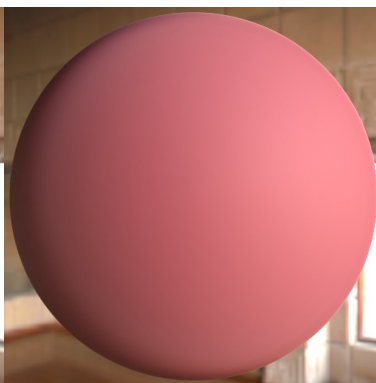

diffraction

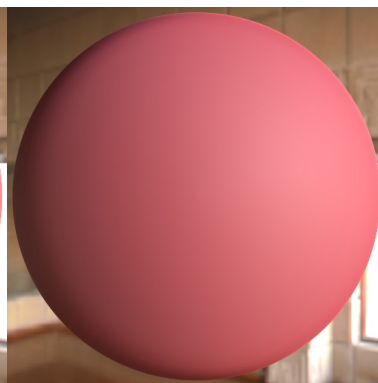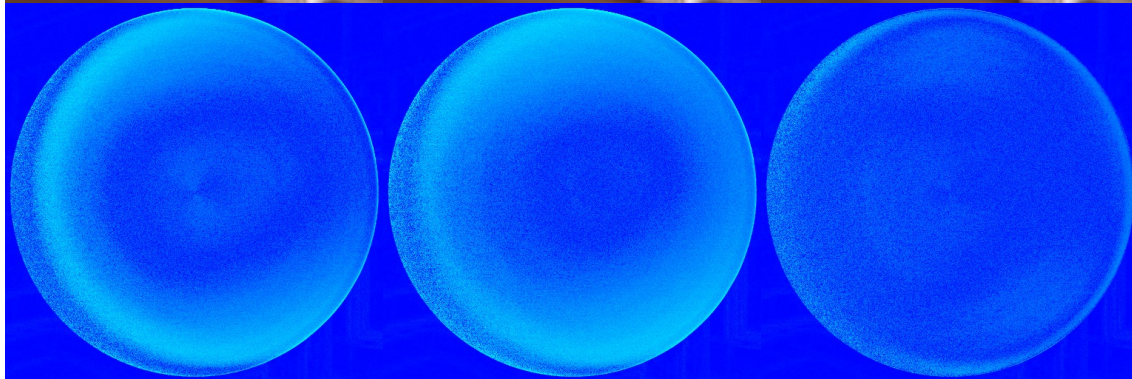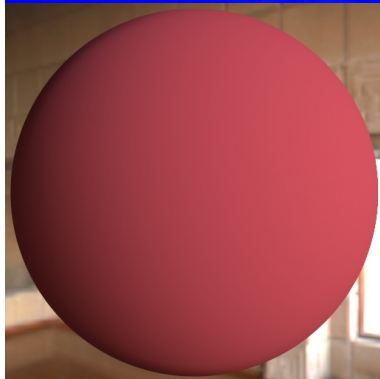

diffuse

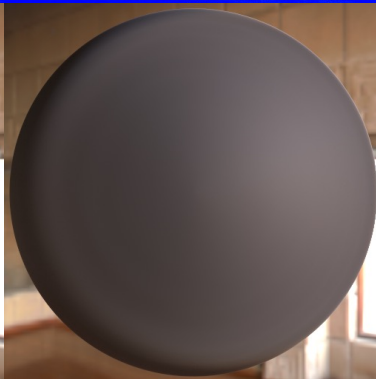

sun18 spec.

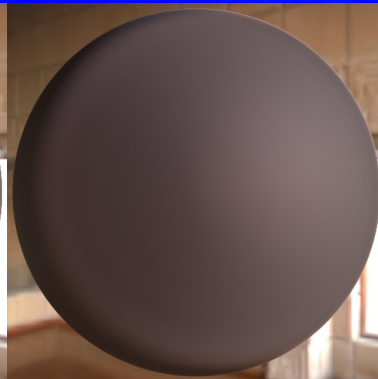

Fresnel spec.

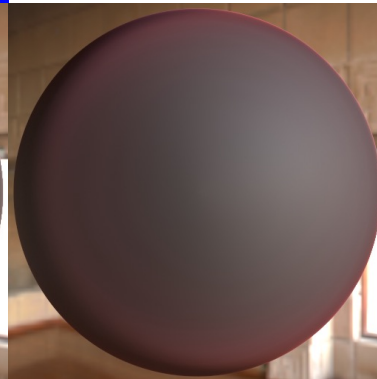

diffraction spec.

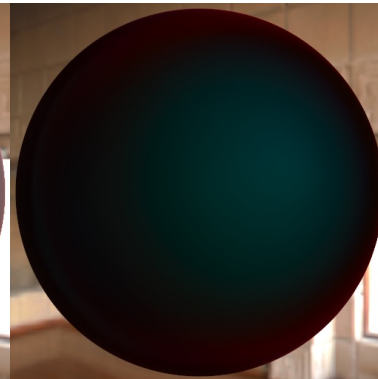

diff. effect

# ilm\_l3\_37\_dark\_green

ref

sun18

Fresnel

diffraction

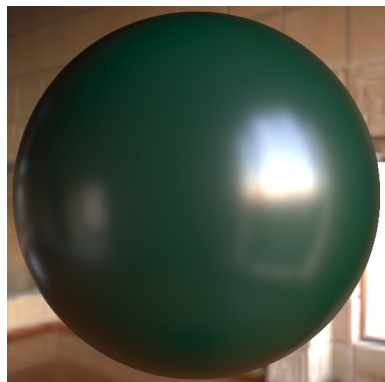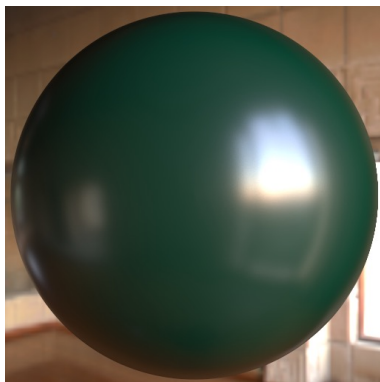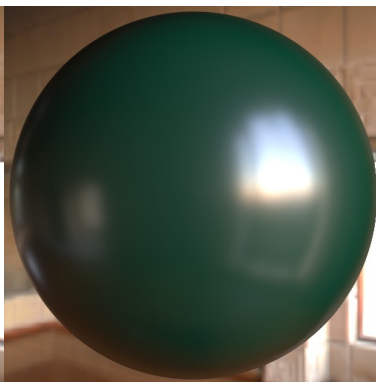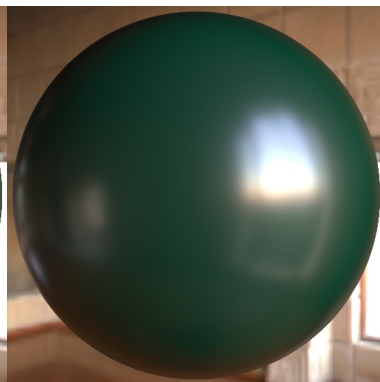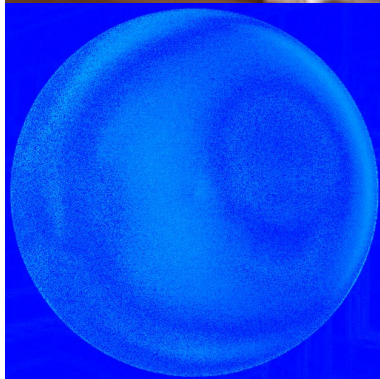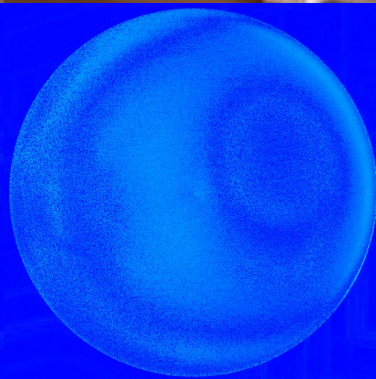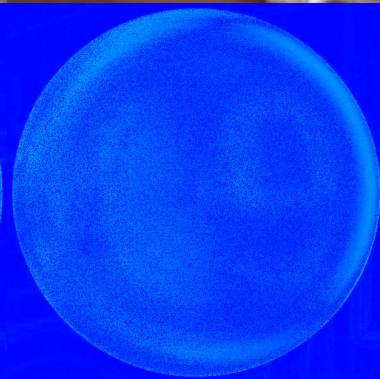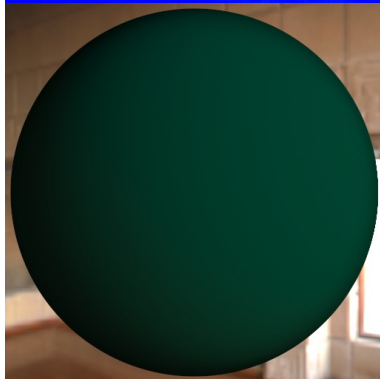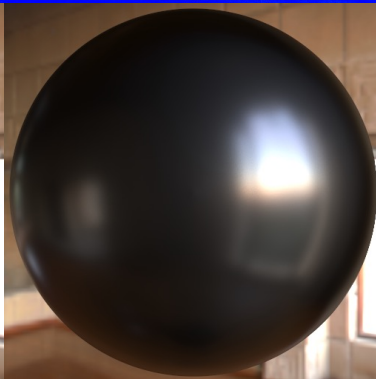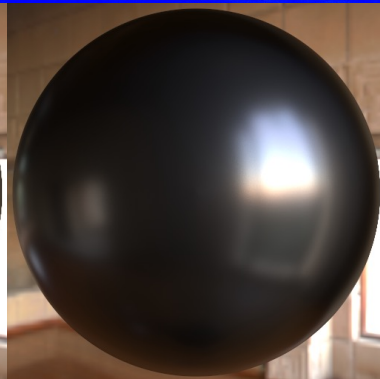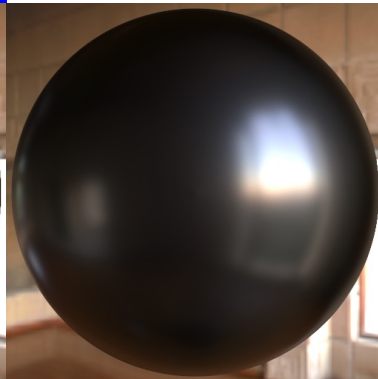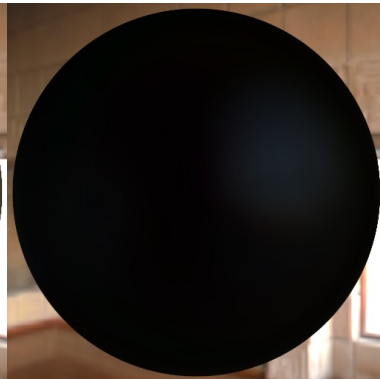

diffuse

sun18 spec.

Fresnel spec.

diffraction spec. diff. effect

# ilm\_l3\_37\_matte

ref

sun18

Fresnel

diffraction

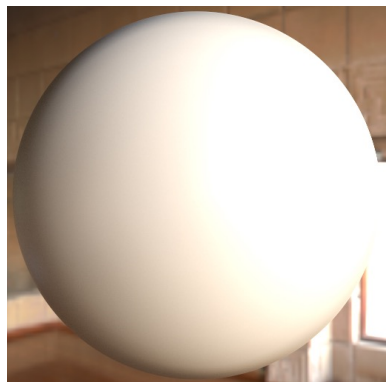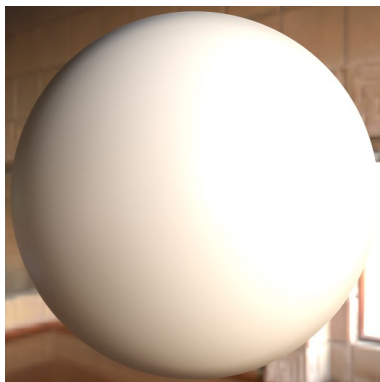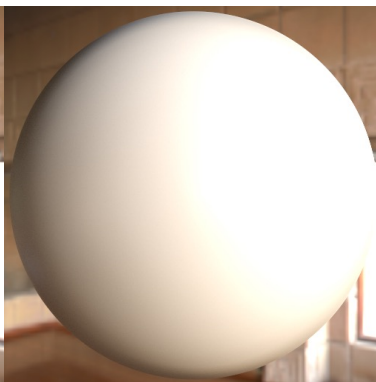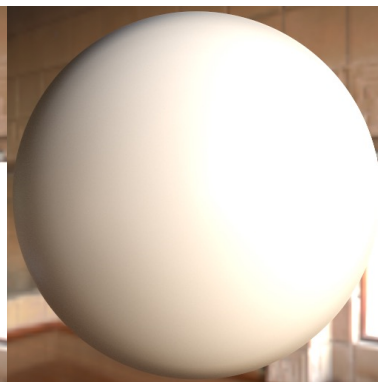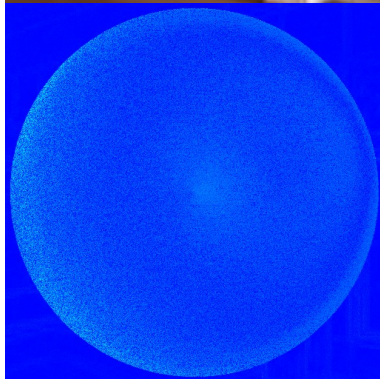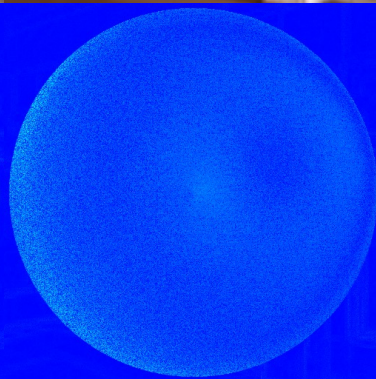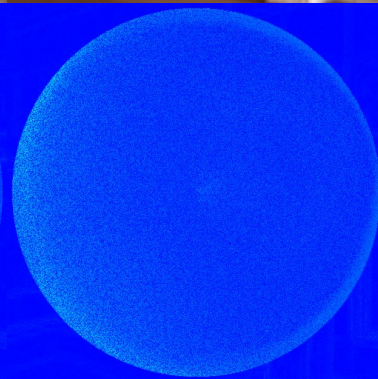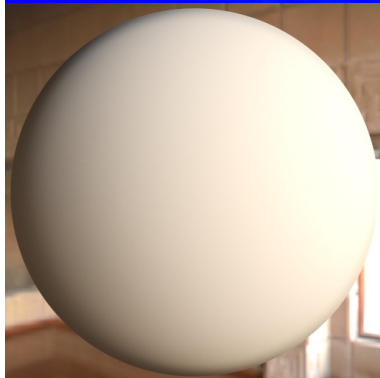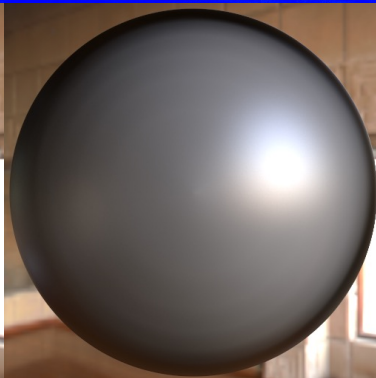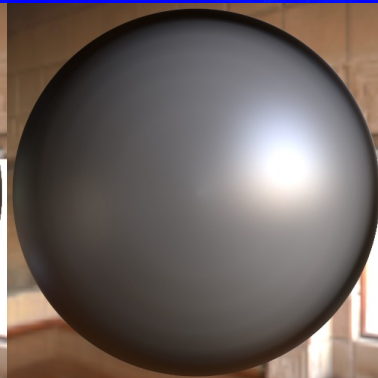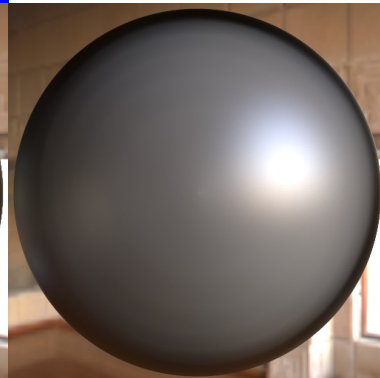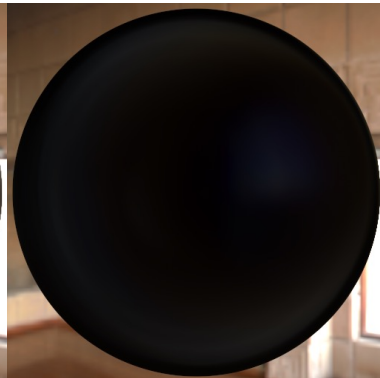

diffuse

sun18 spec.

Fresnel spec.

diffraction spec. diff. effect

# ilm\_l3\_37\_metallic

ref

sun18

Fresnel

diffraction

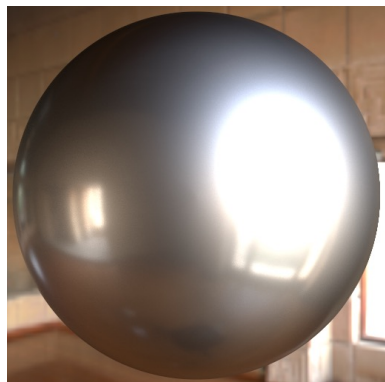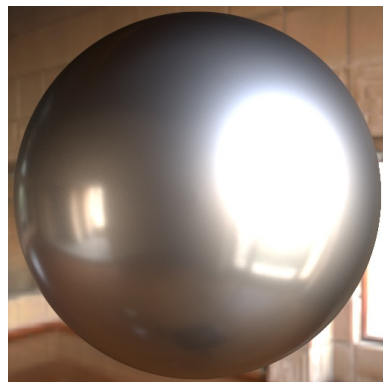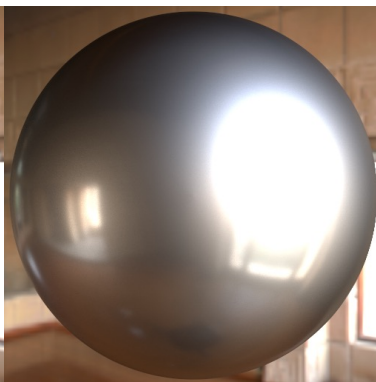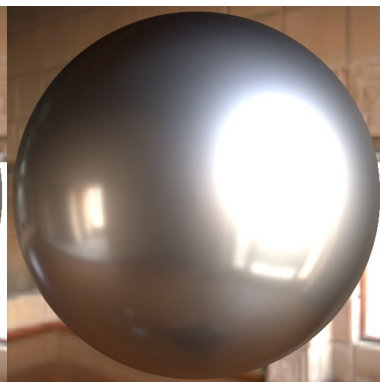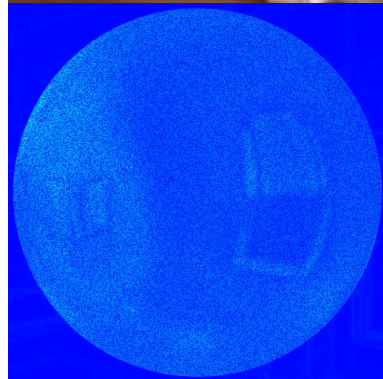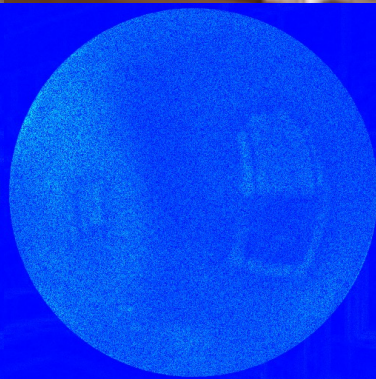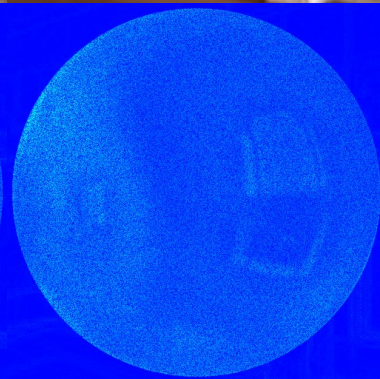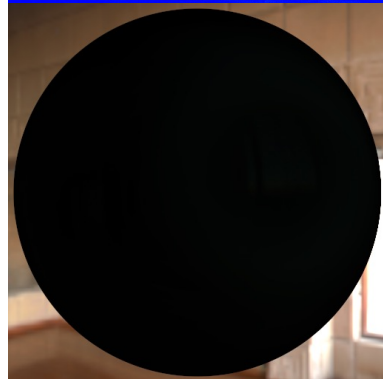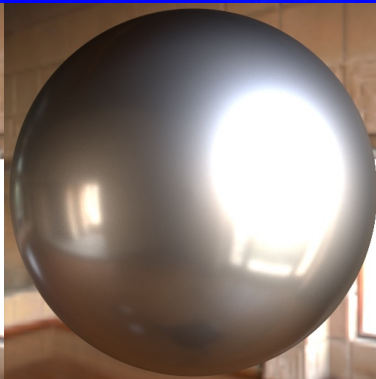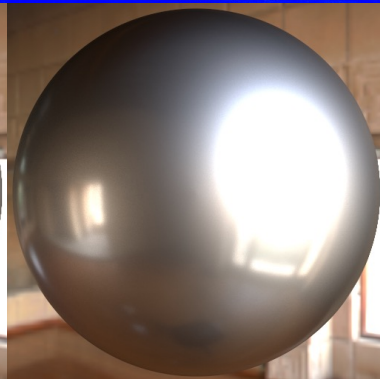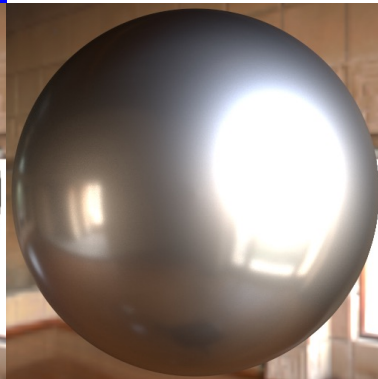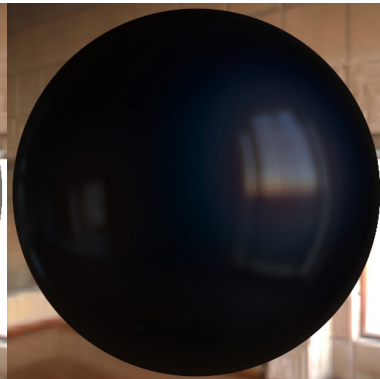

diffuse

sun18 spec.

Fresnel spec.

diffraction spec. diff. effect

# ilm\_solo\_m\_68

ref

sun18

Fresnel

diffraction

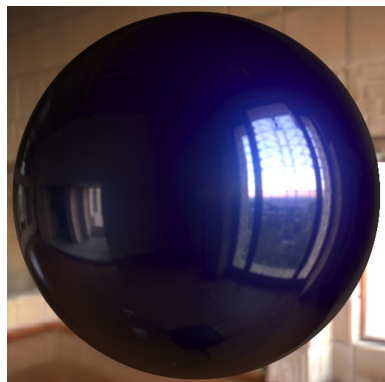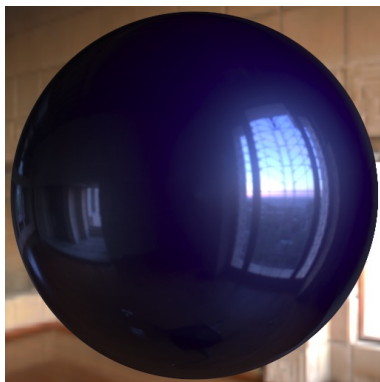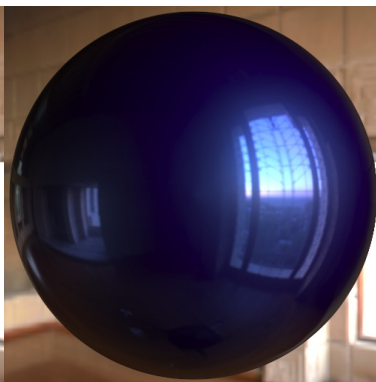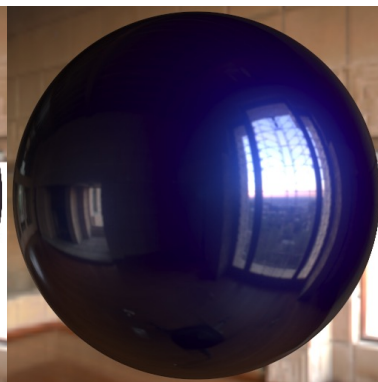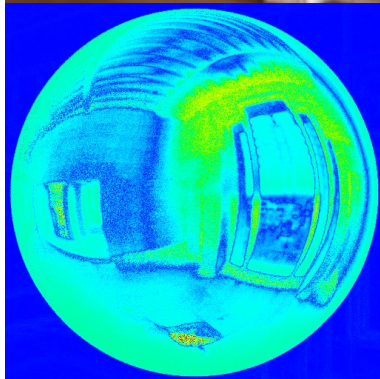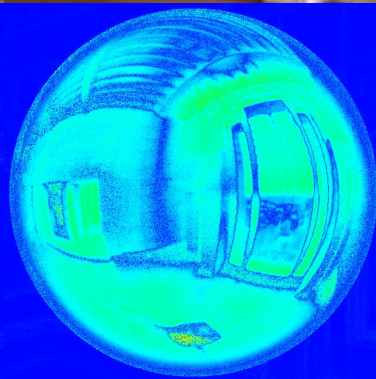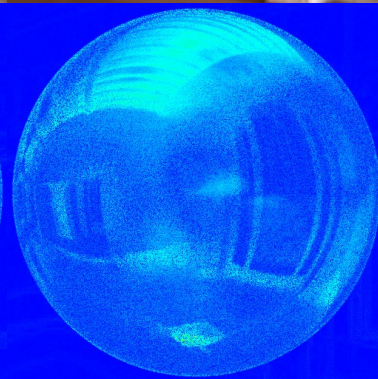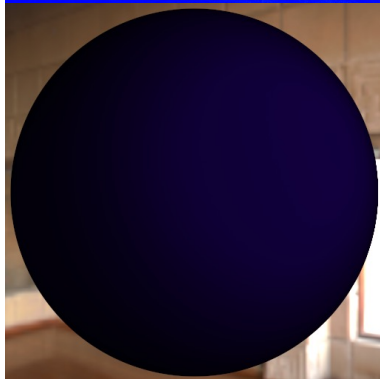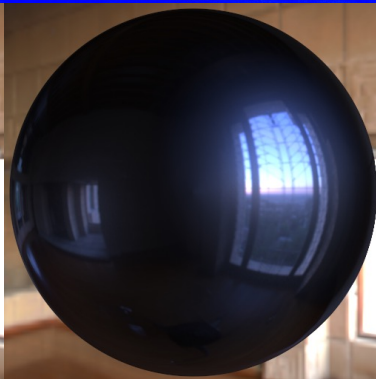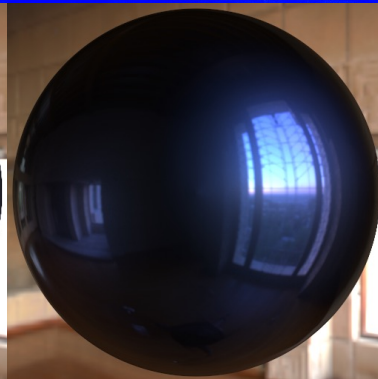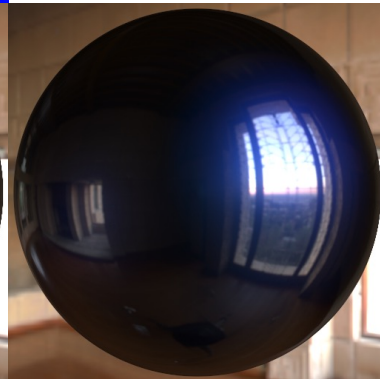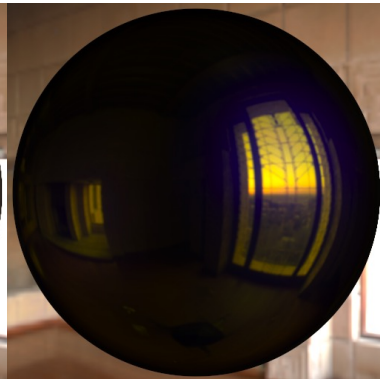

diffuse

sun18 spec.

Fresnel spec.

diffraction spec. diff. effect

# ilm\_solo\_millennium\_falcon

ref

sun18

Fresnel

diffraction

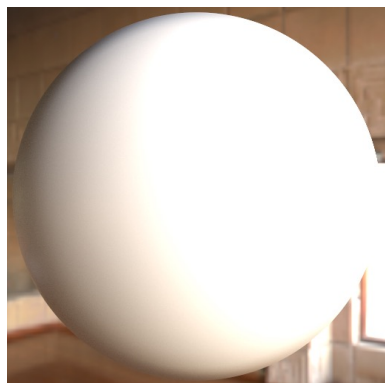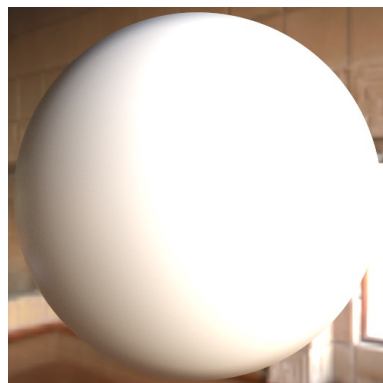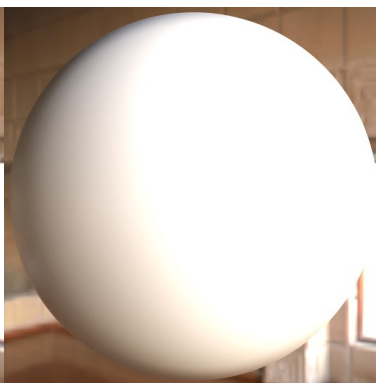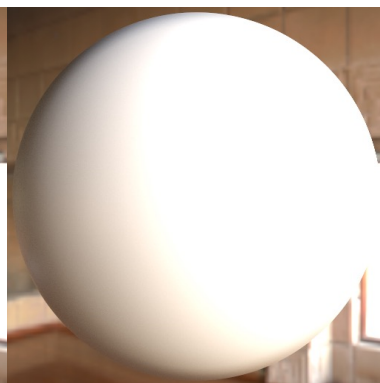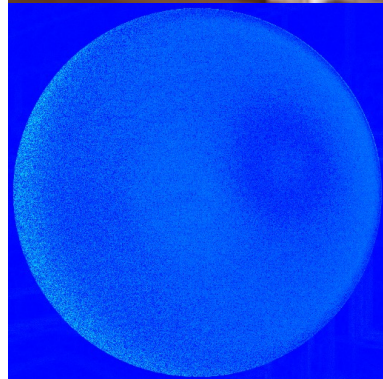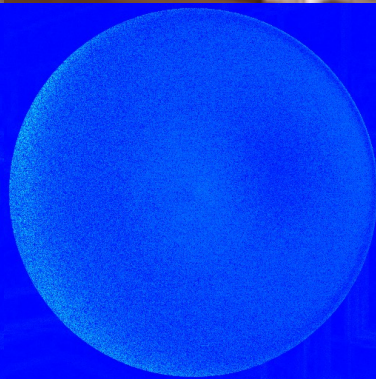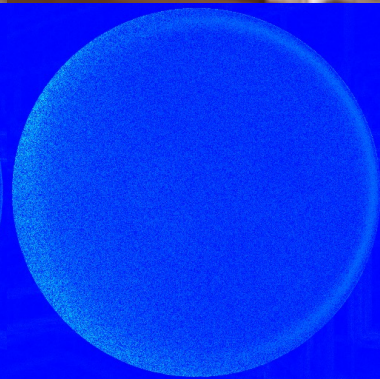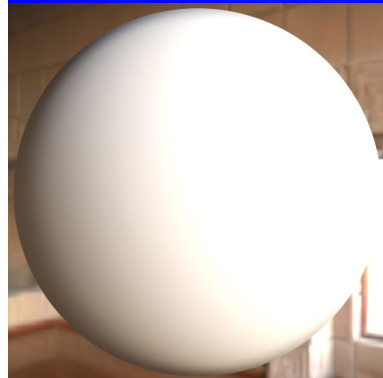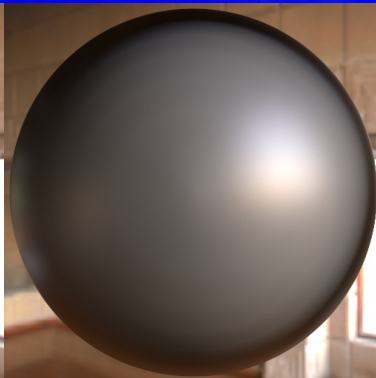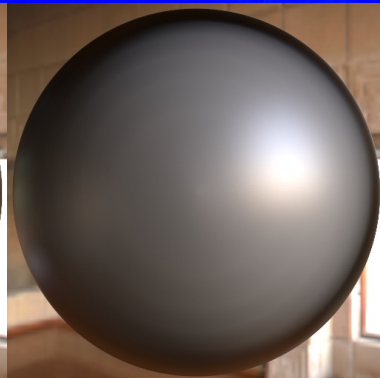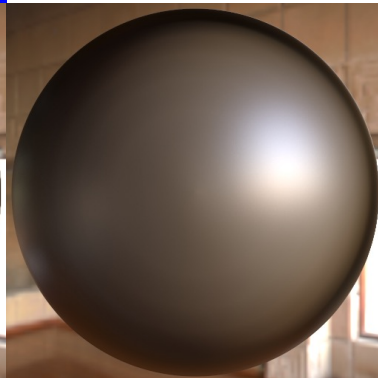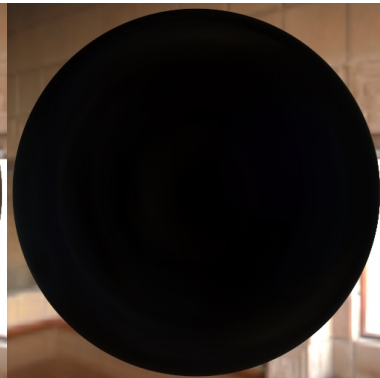

diffuse

sun18 spec.

Fresnel spec.

diffraction spec. diff. effect

# irid\_flake\_paint1\_fine

ref

sun18

Fresnel

diffraction

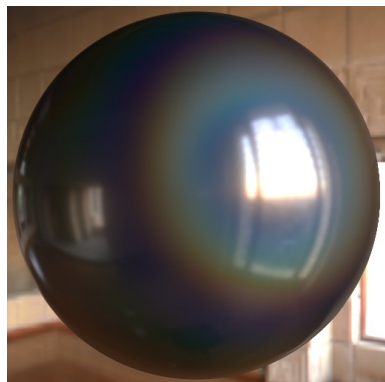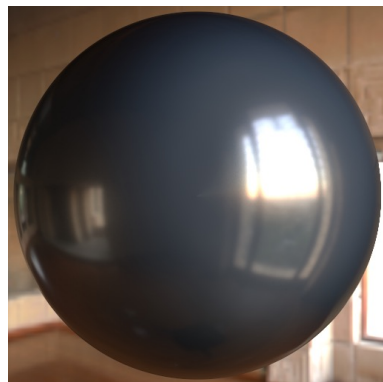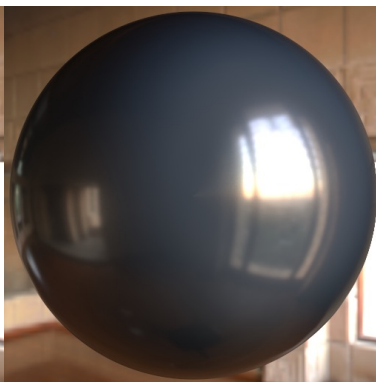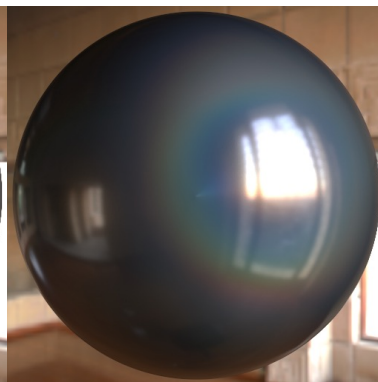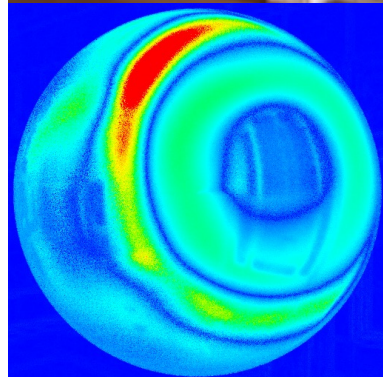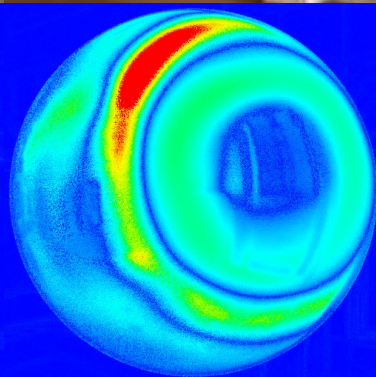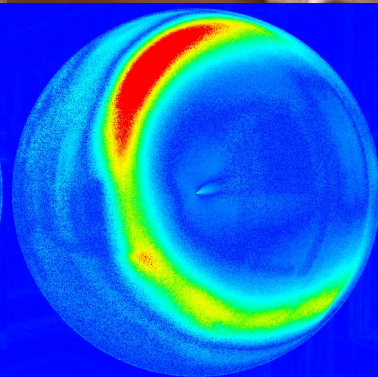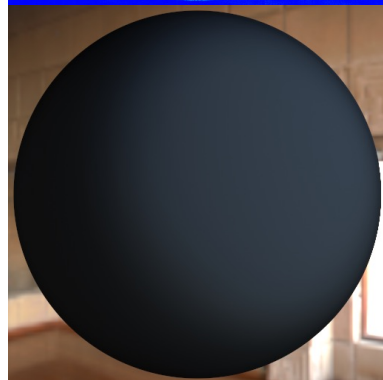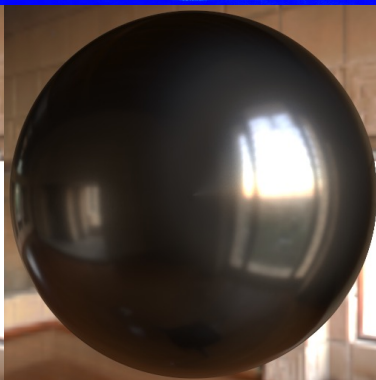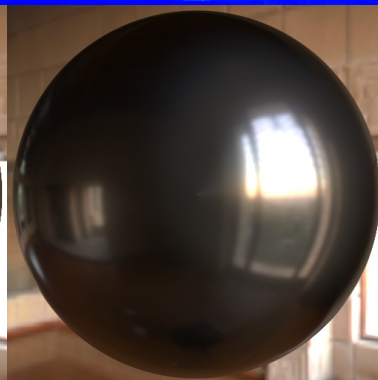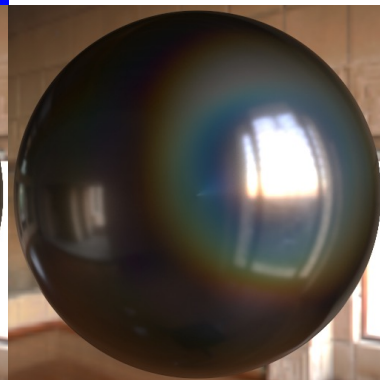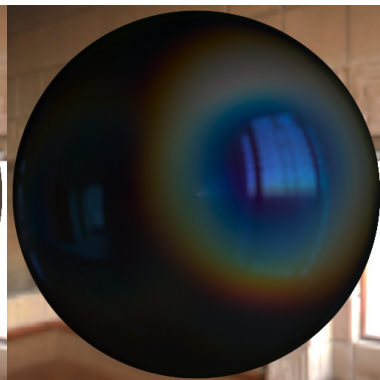

diffuse

sun18 spec.

Fresnel spec.

diffraction spec. diff. effect

# irid\_flake\_paint1

ref

sun18

Fresnel

diffraction

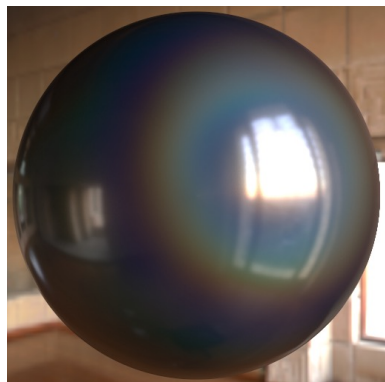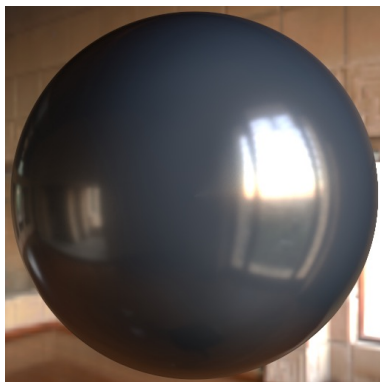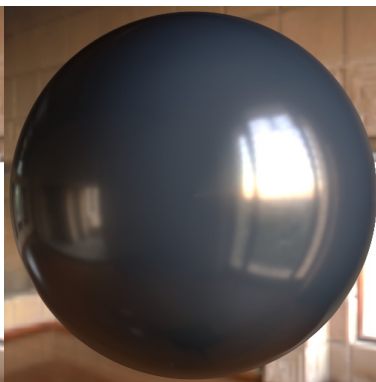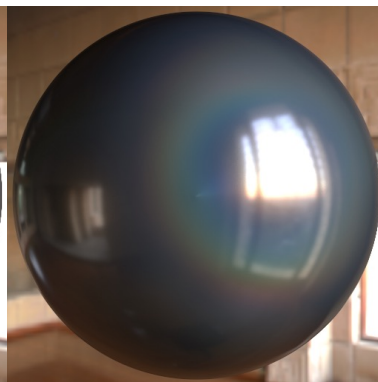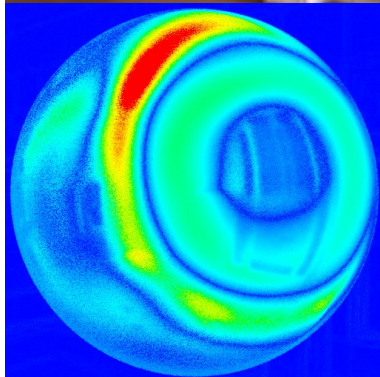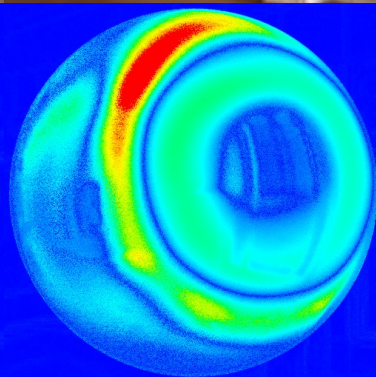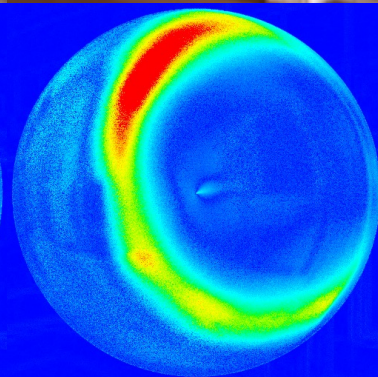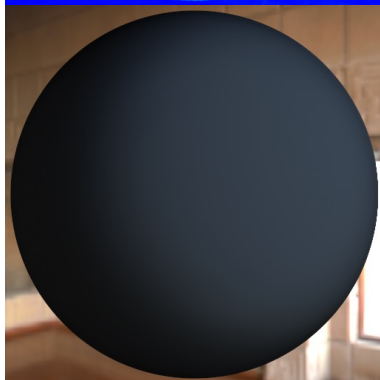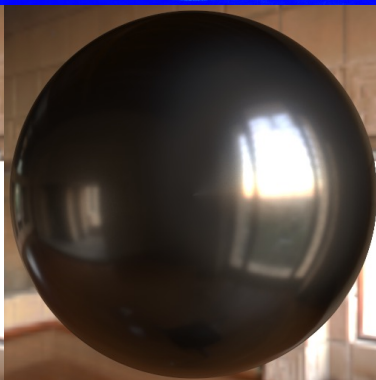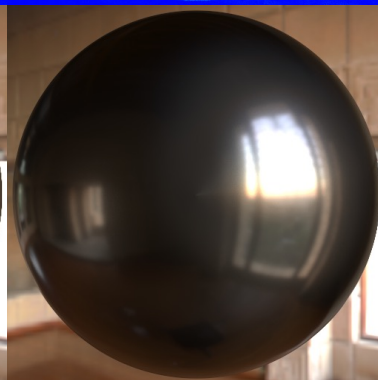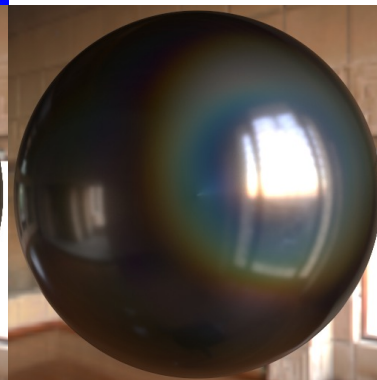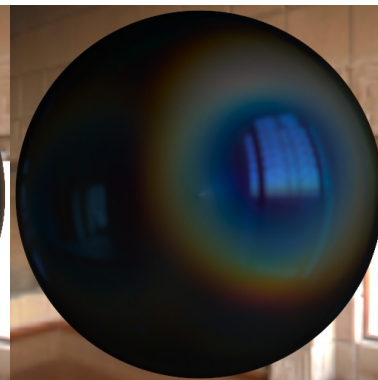

diffuse

sun18 spec.

Fresnel spec.

diffraction spec. diff. effect

# irid\_flake\_paint2

ref

sun18

Fresnel

diffraction

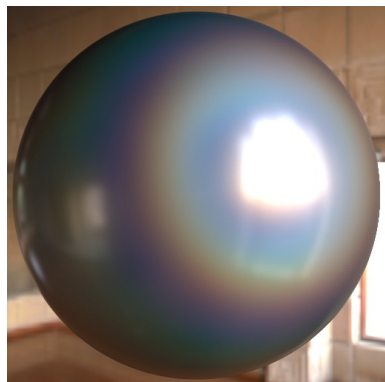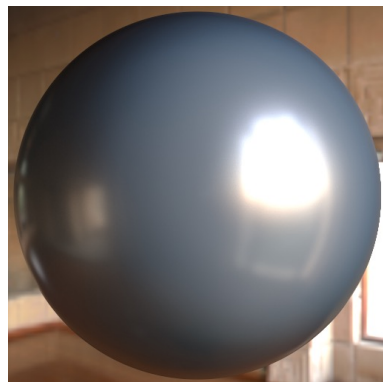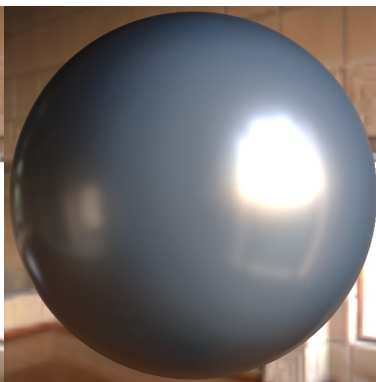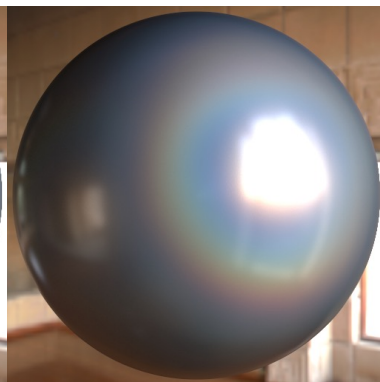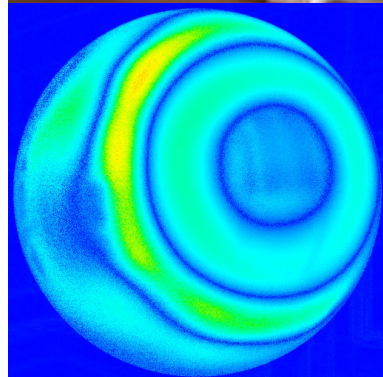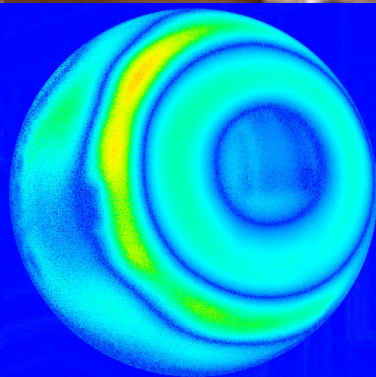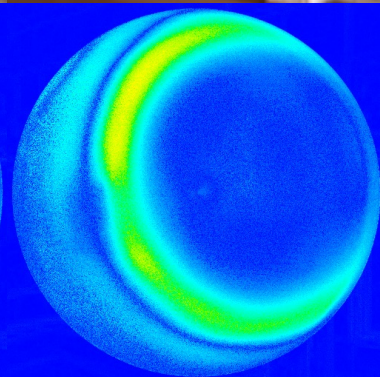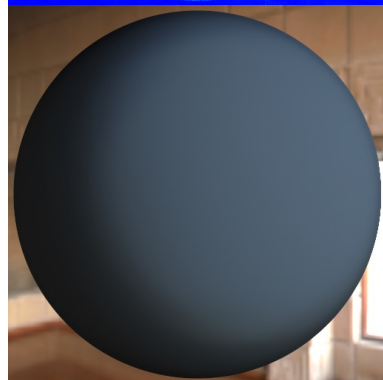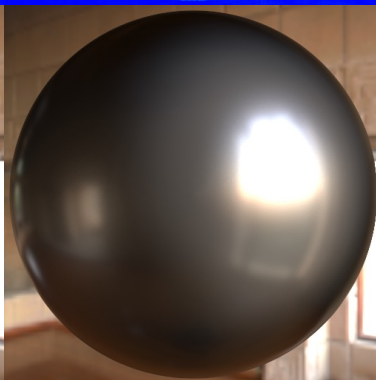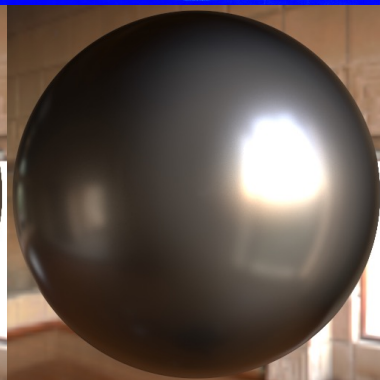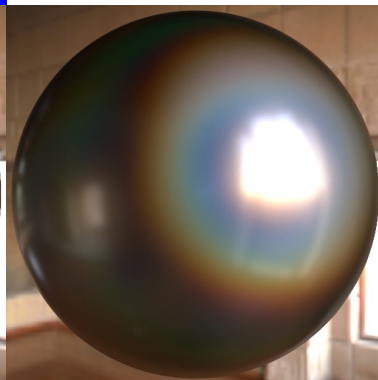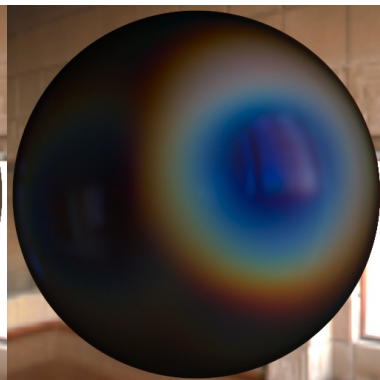

diffuse

sun18 spec.

Fresnel spec.

diffraction spec. diff. effect

# laika\_ceiling\_paint\_18\_gray

ref

sun18

Fresnel

diffraction

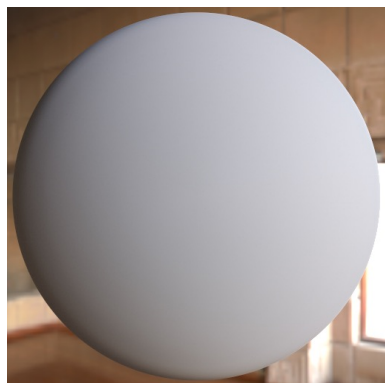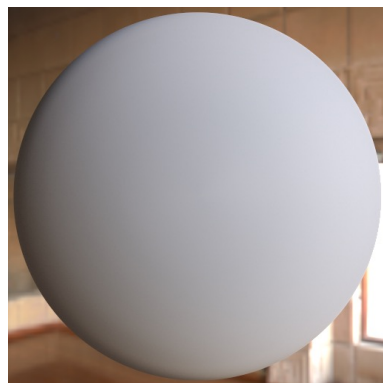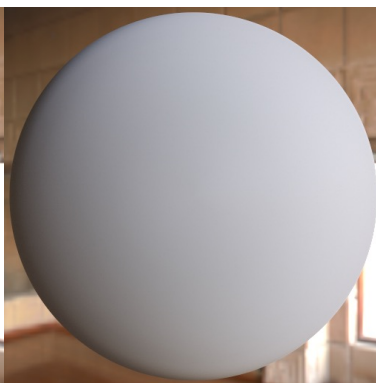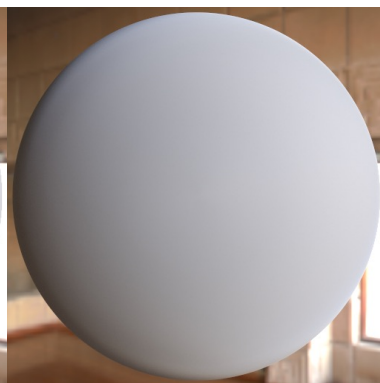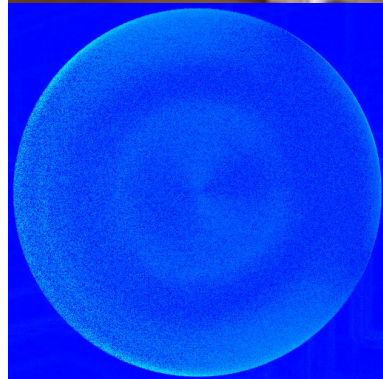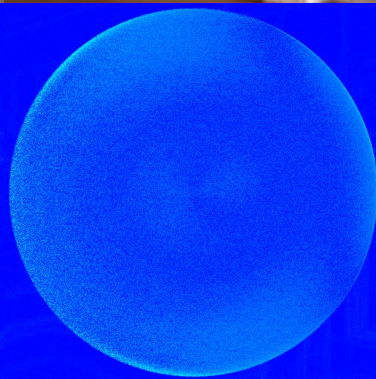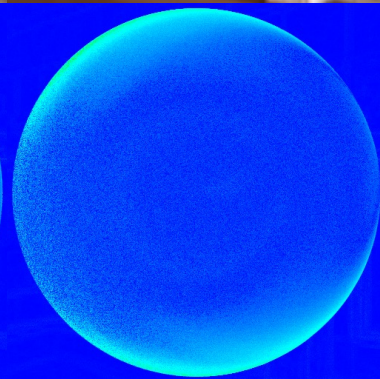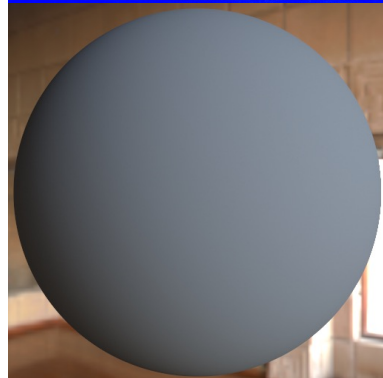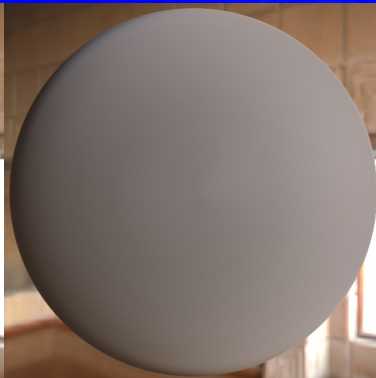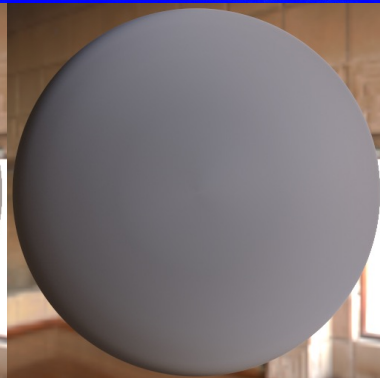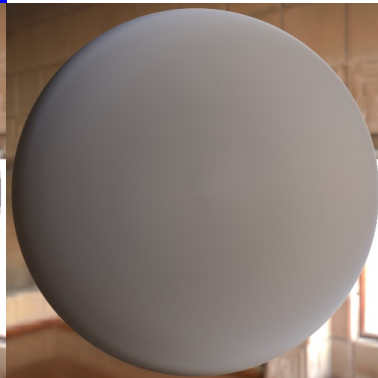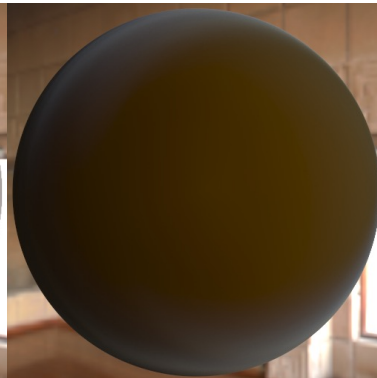

diffuse

sun18 spec.

Fresnel spec.

diffraction spec. diff. effect

# leaf\_maple

ref

sun18

Fresnel

diffraction

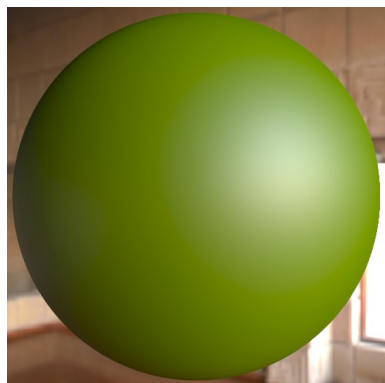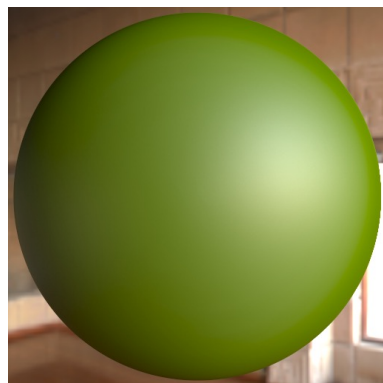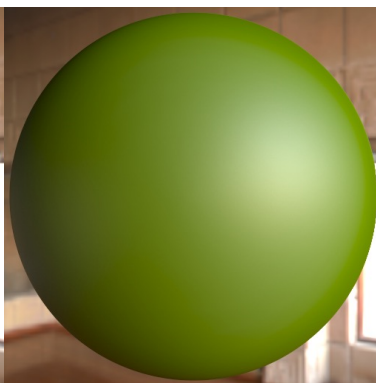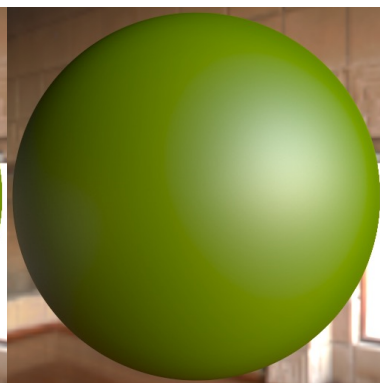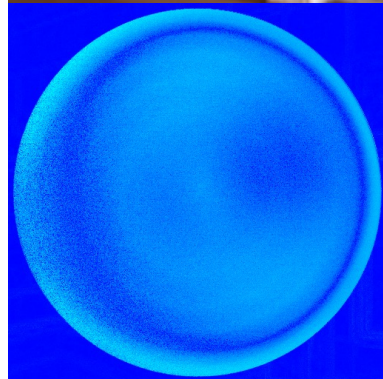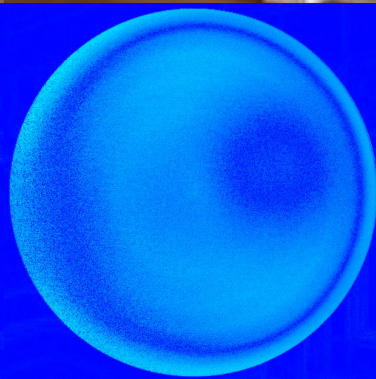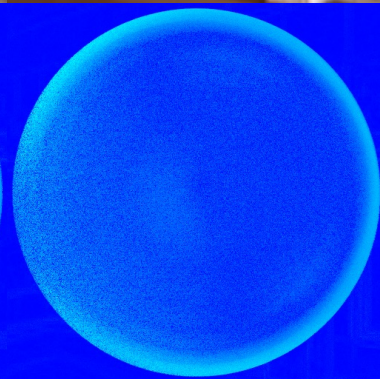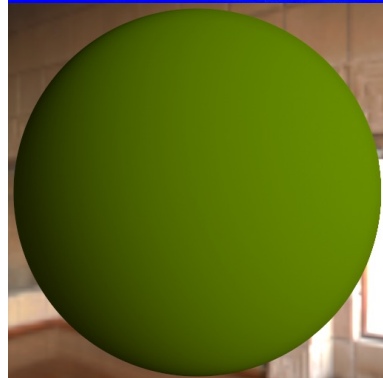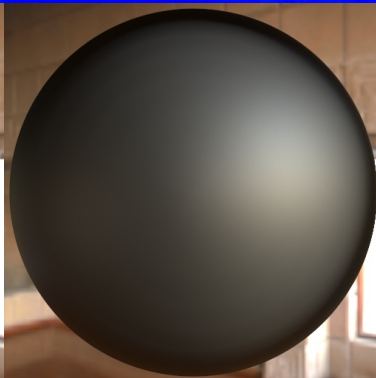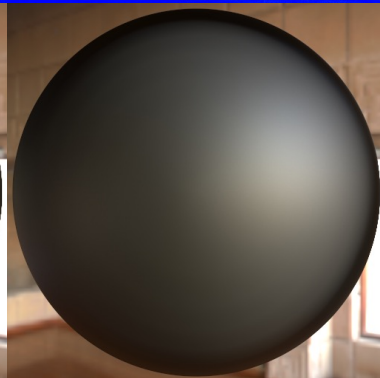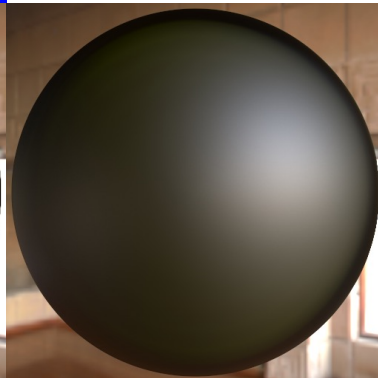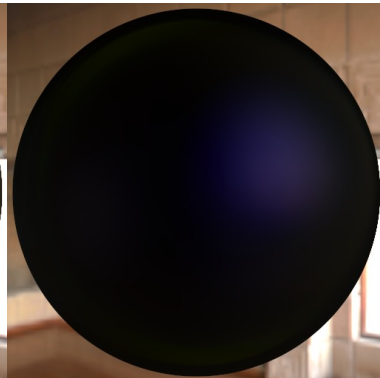

diffuse

sun18 spec.

Fresnel spec.

diffraction spec. diff. effect

# paper\_blue

ref

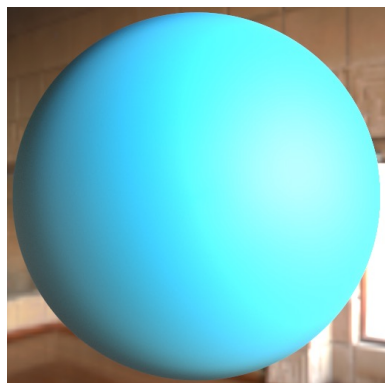

sun18

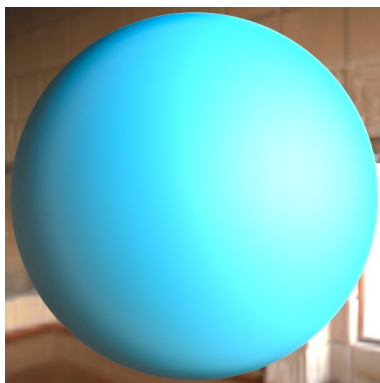

Fresnel

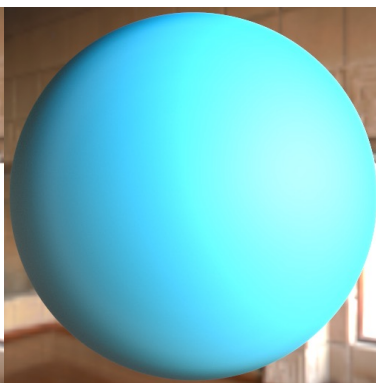

diffraction

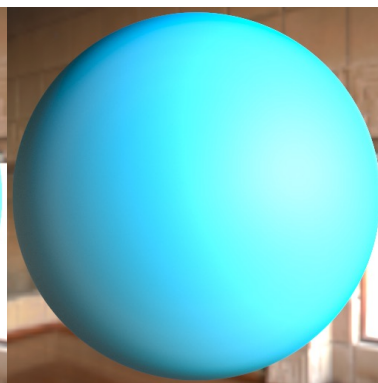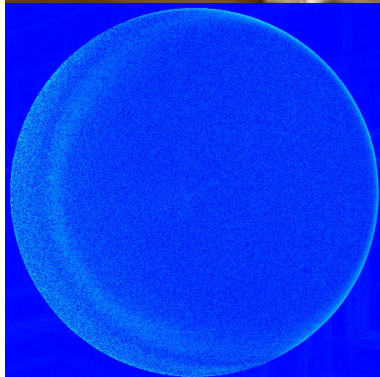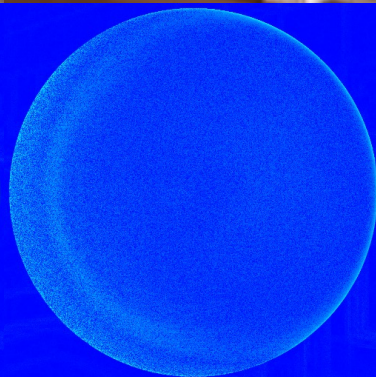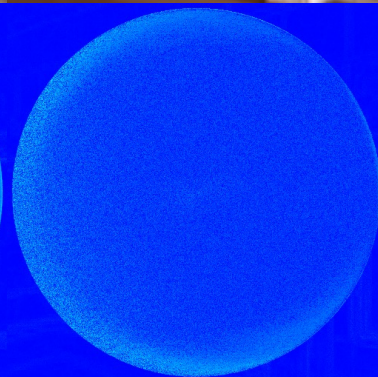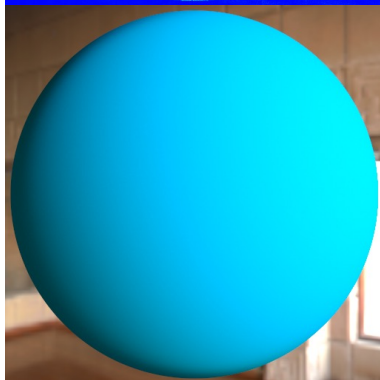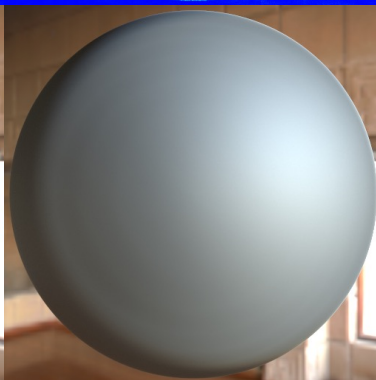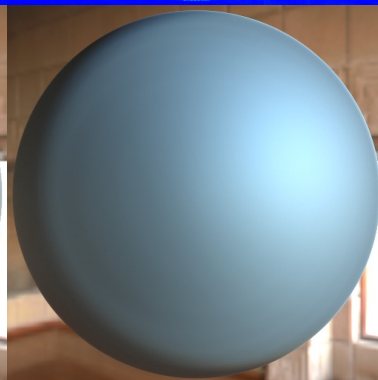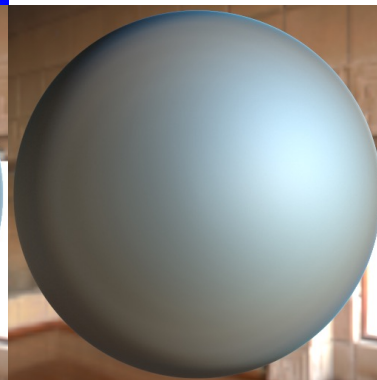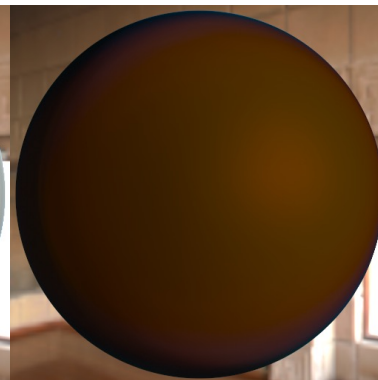

diffuse

sun18 spec.

Fresnel spec.

diffraction spec. diff. effect

# paper\_green

ref

sun18

Fresnel

diffraction

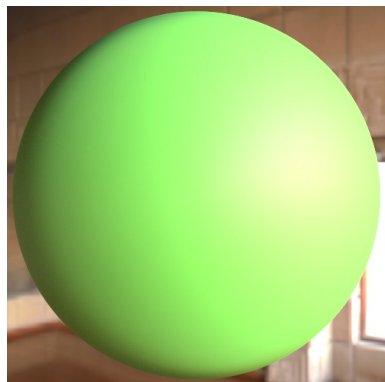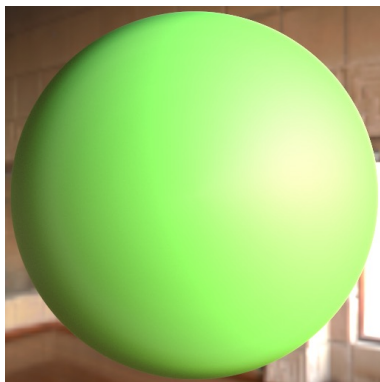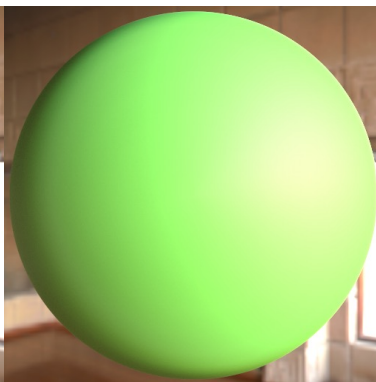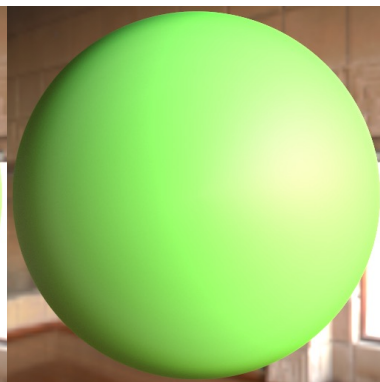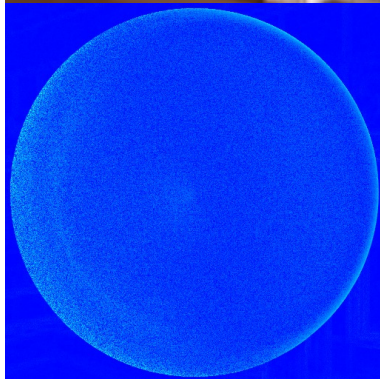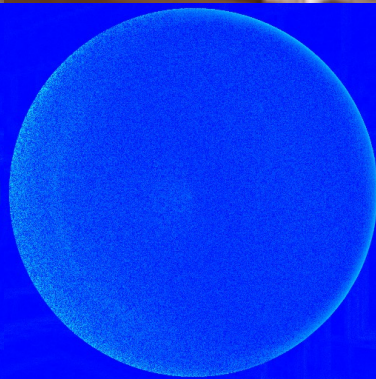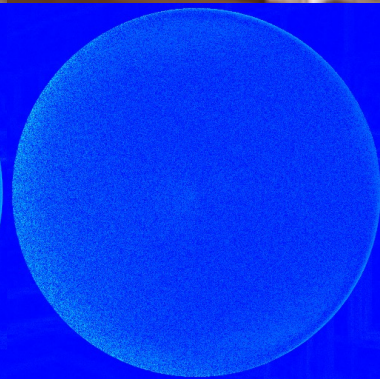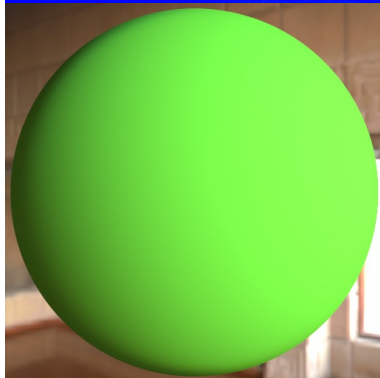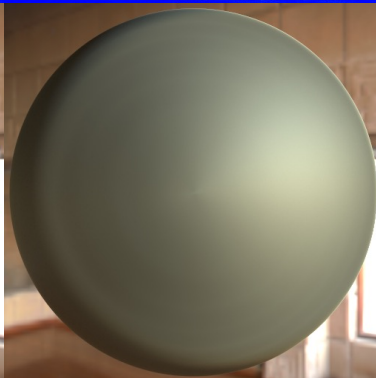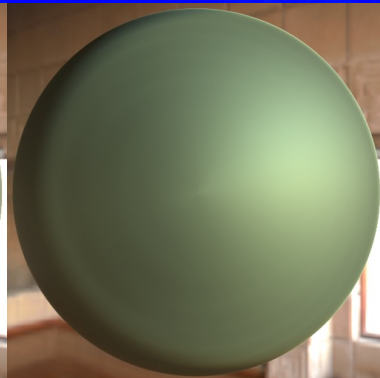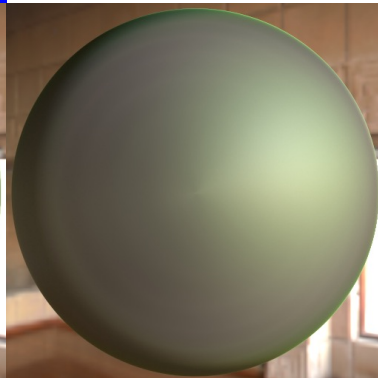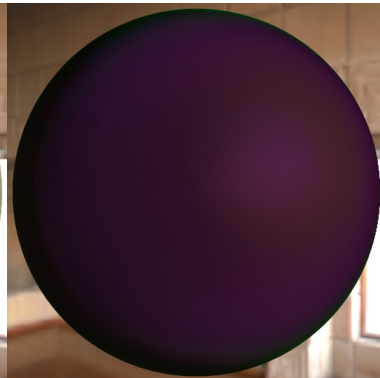

diffuse

sun18 spec.

Fresnel spec.

diffraction spec. diff. effect

# paper\_red

ref

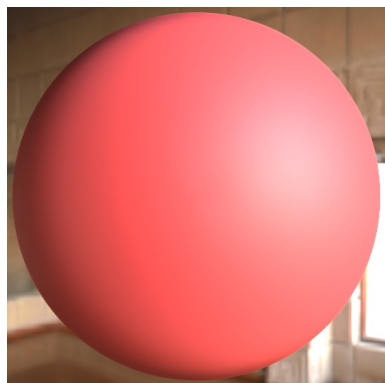

sun18

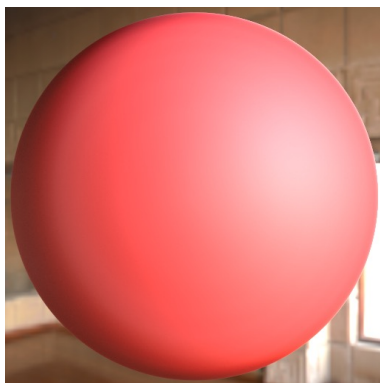

Fresnel

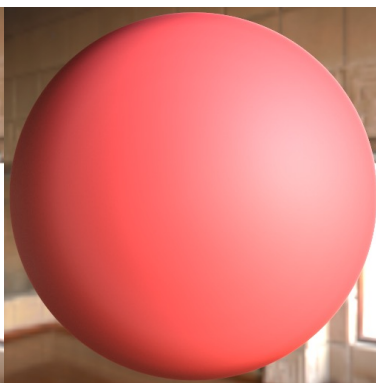

diffraction

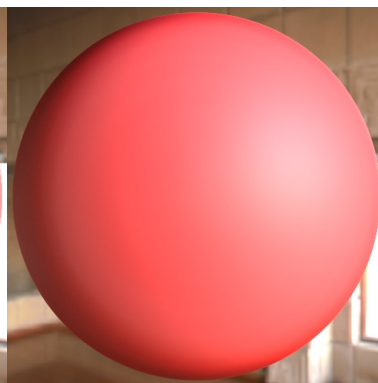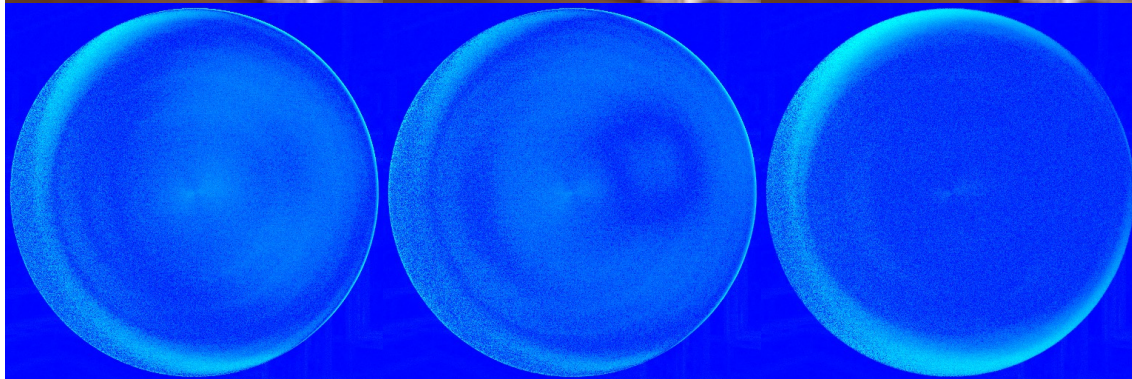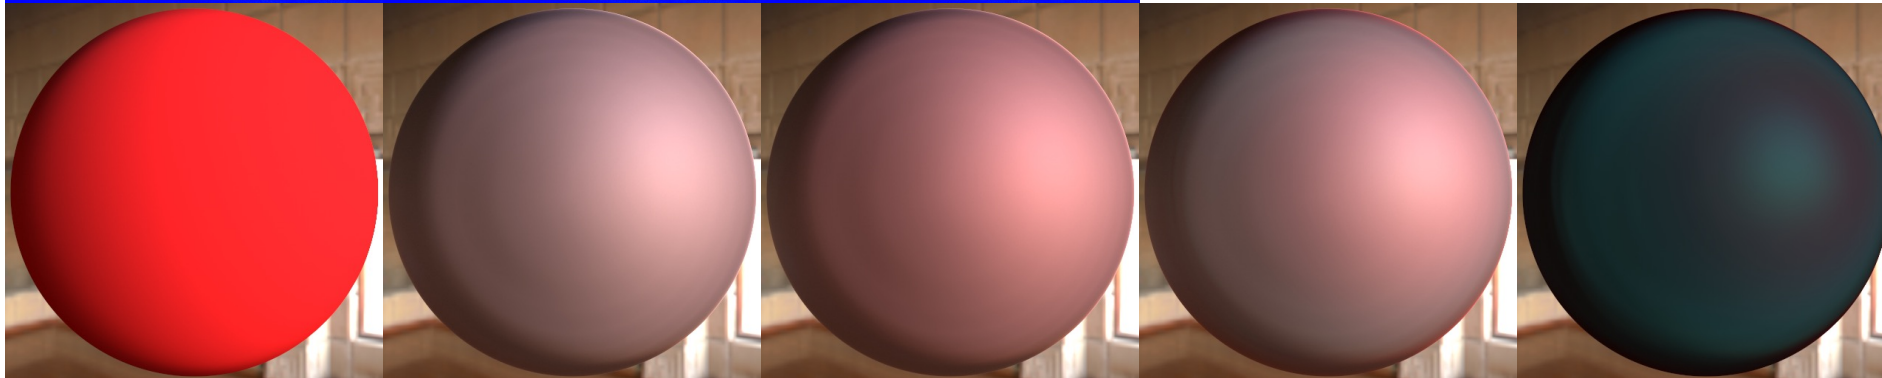

diffuse

sun18 spec.

Fresnel spec.

diffraction spec. diff. effect

# paper\_white

ref

sun18

Fresnel

diffraction

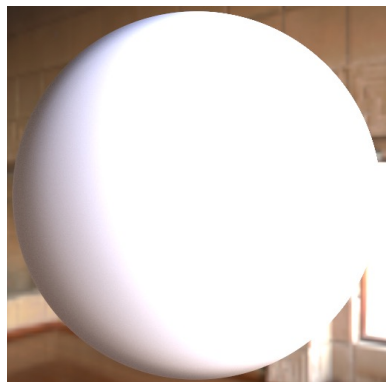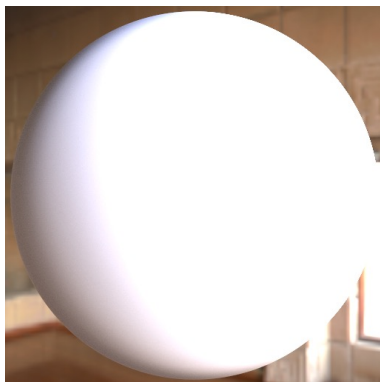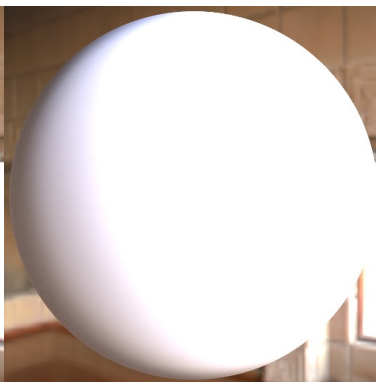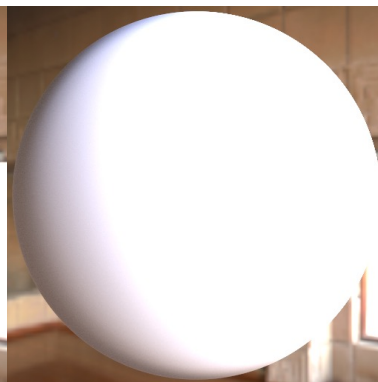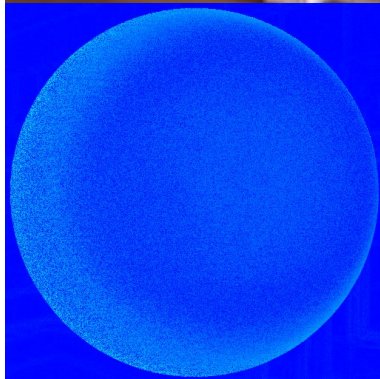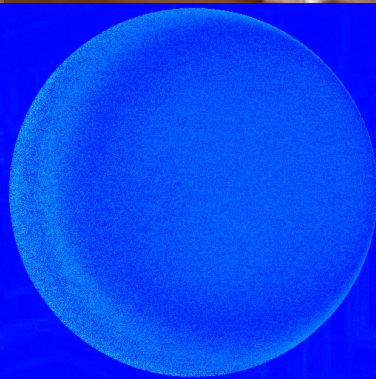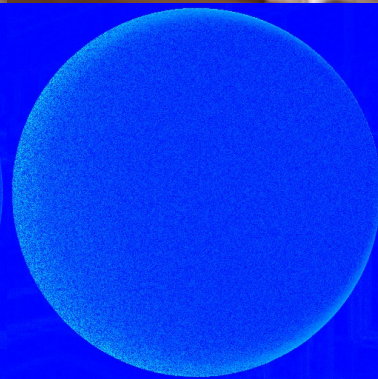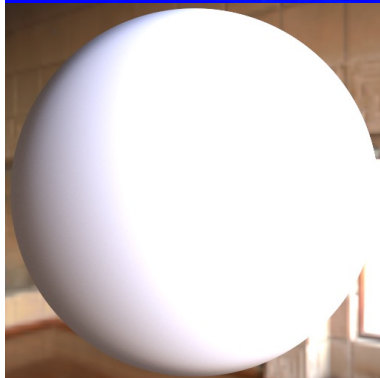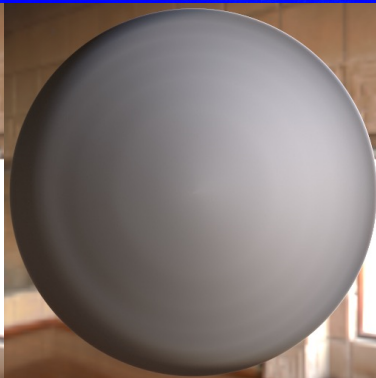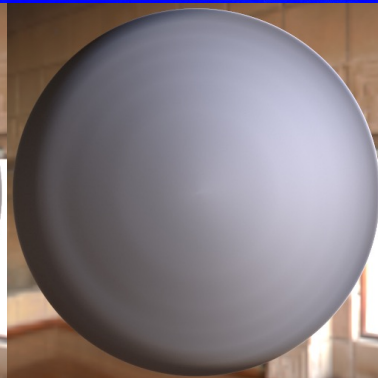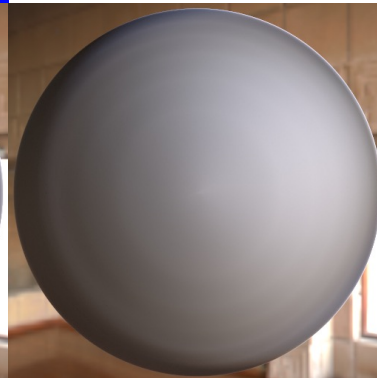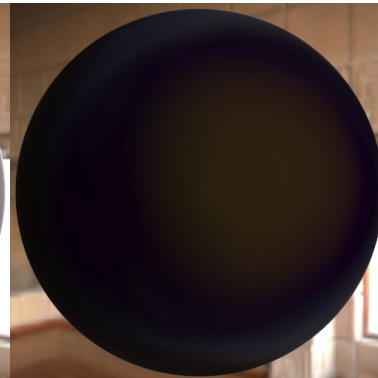

diffuse

sun18 spec.

Fresnel spec.

diffraction spec. diff. effect

# paper\_yellow

ref

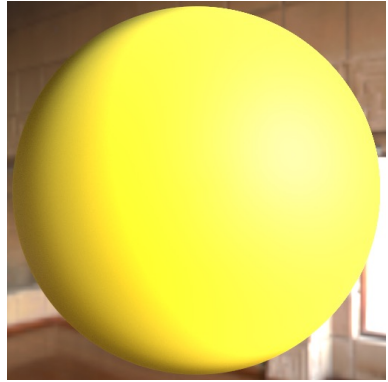

sun18

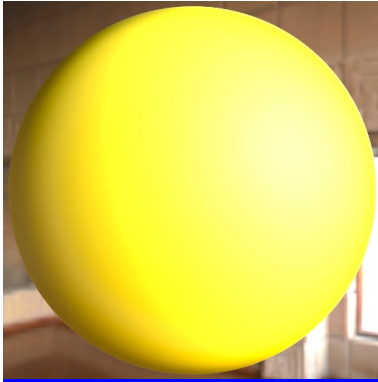

Fresnel

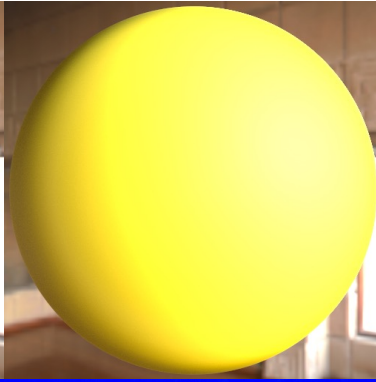

diffraction

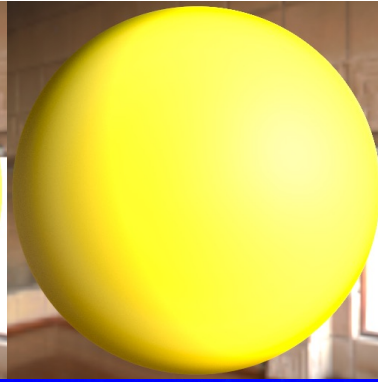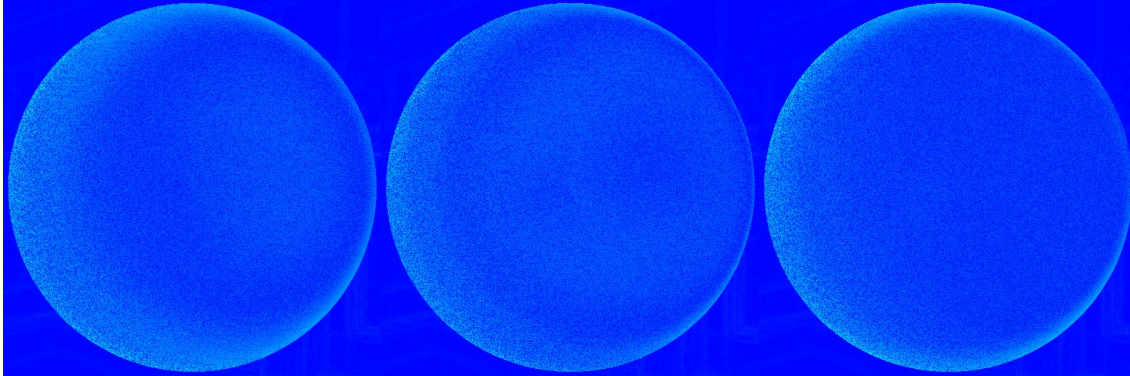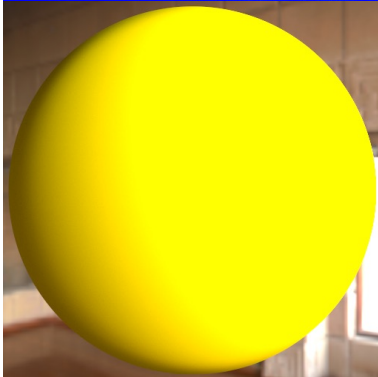

diffuse

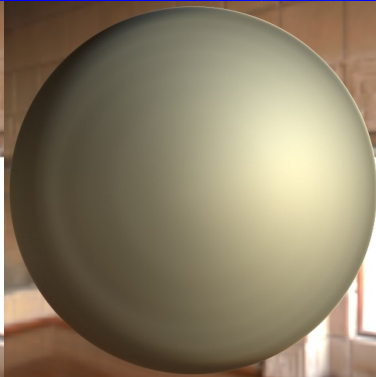

sun18 spec.

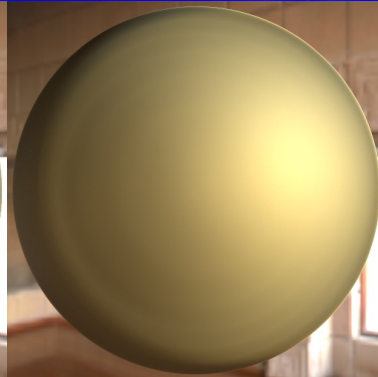

Fresnel spec.

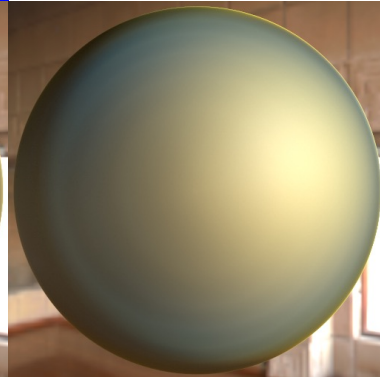

diffraction spec.

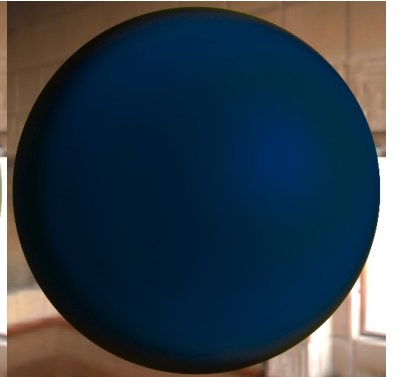

diff. effect

# satin\_blue

ref

sun18

Fresnel

diffraction

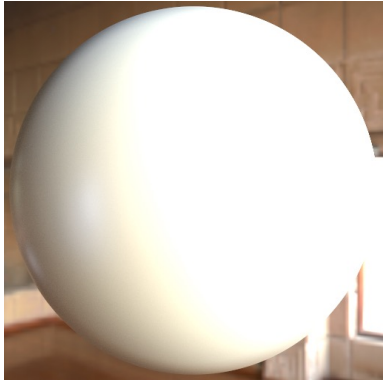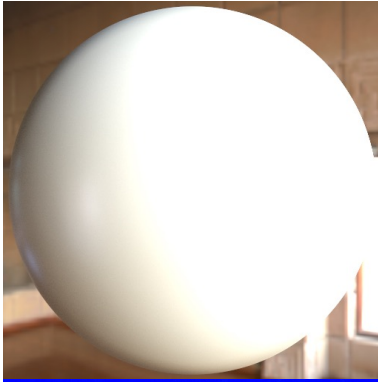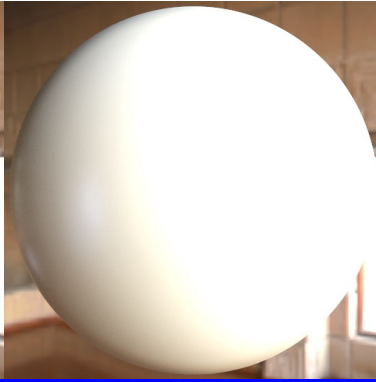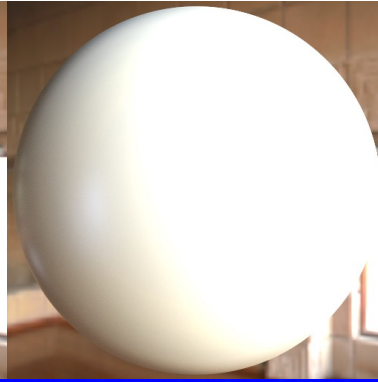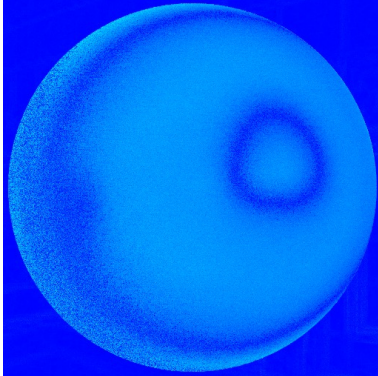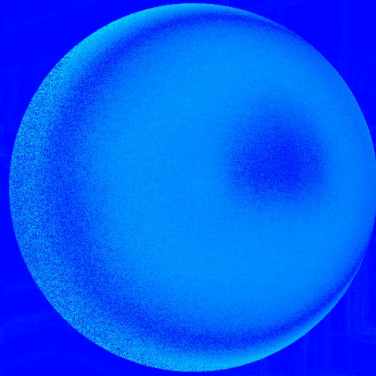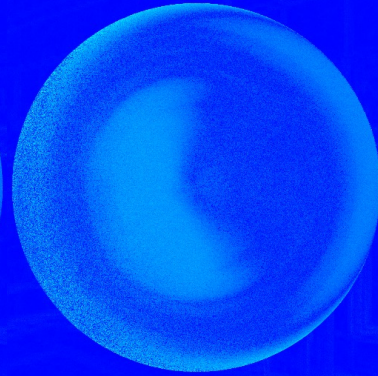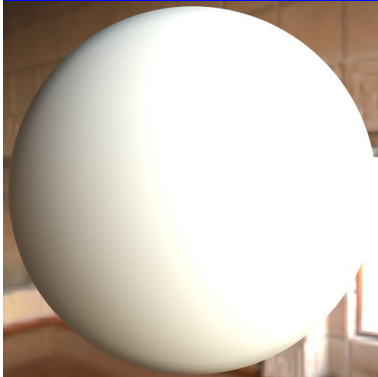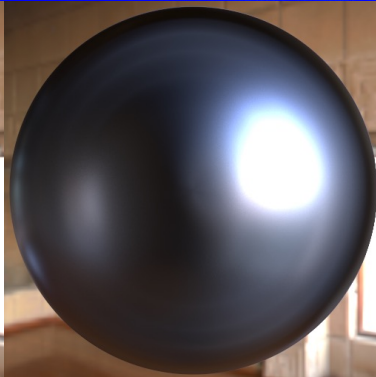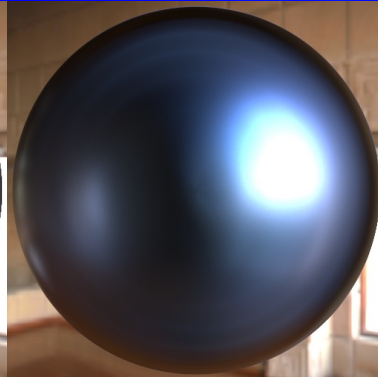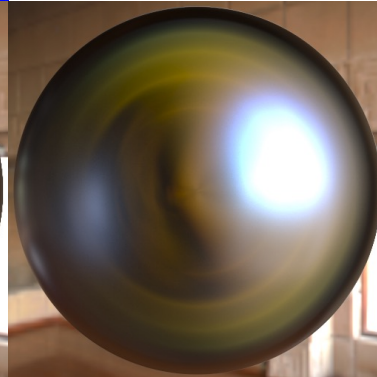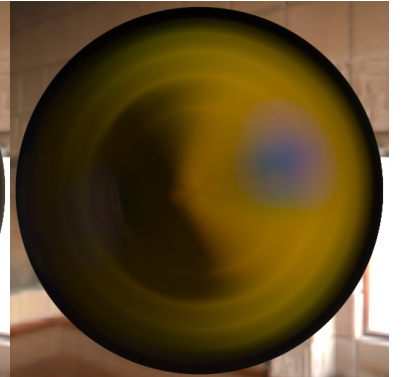

diffuse

sun18 spec.

Fresnel spec.

diffraction spec. diff. effect

# satin\_gold

ref

sun18

Fresnel

diffraction

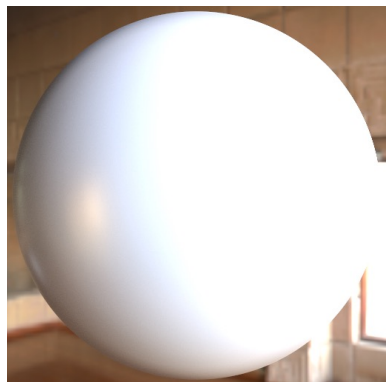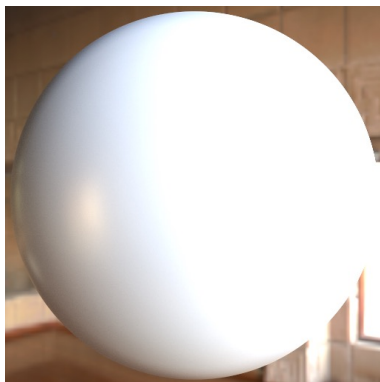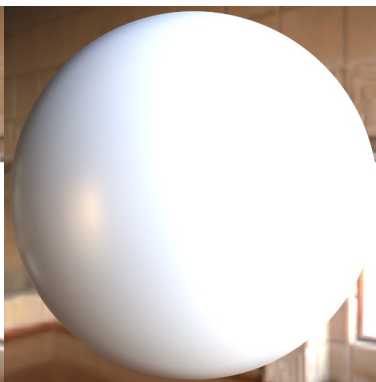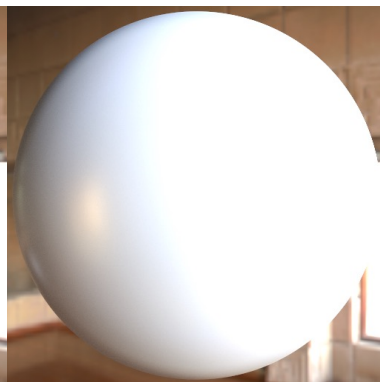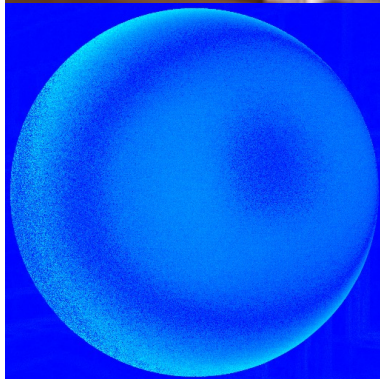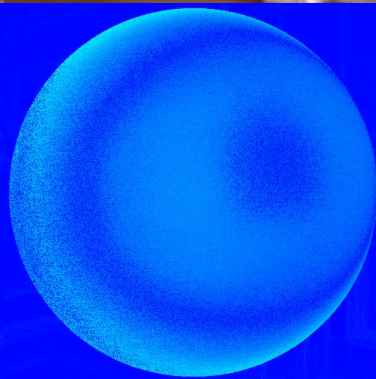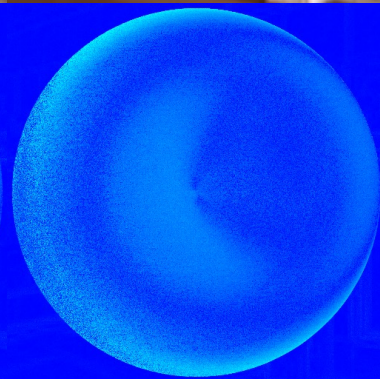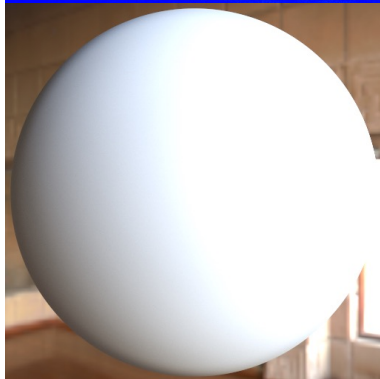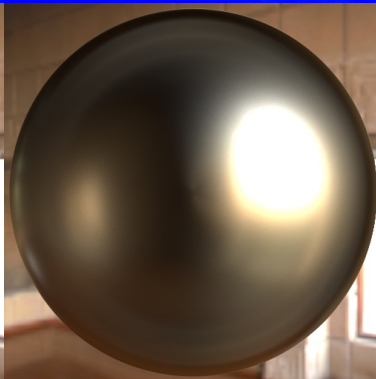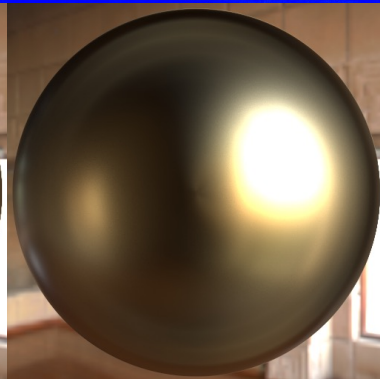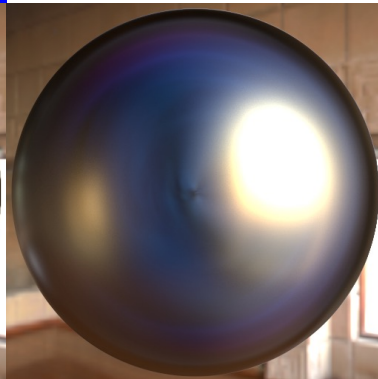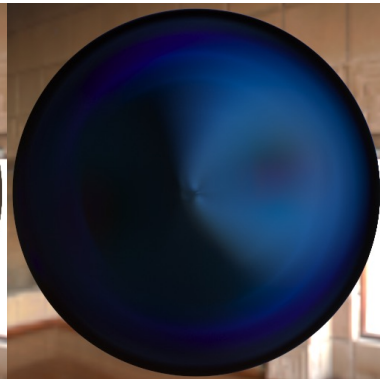

diffuse

sun18 spec.

Fresnel spec.

diffraction spec. diff. effect

# satin\_purple

ref

sun18

Fresnel

diffraction

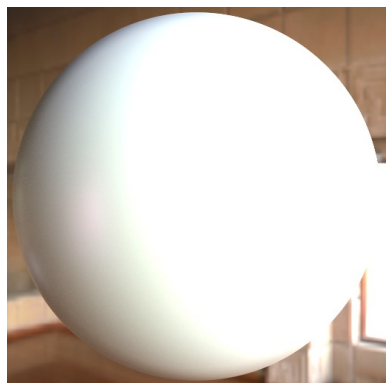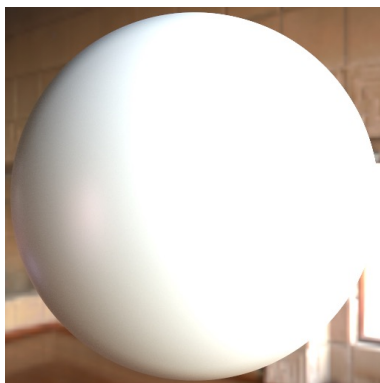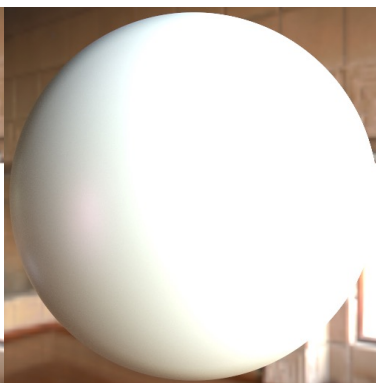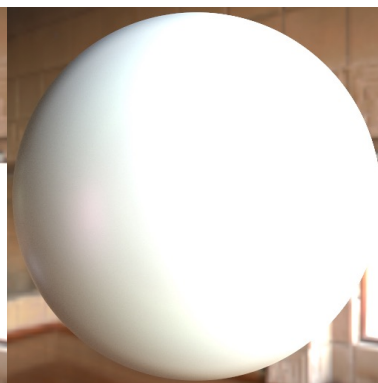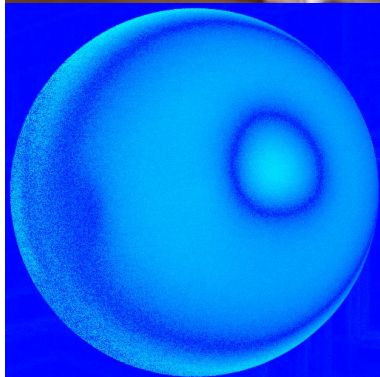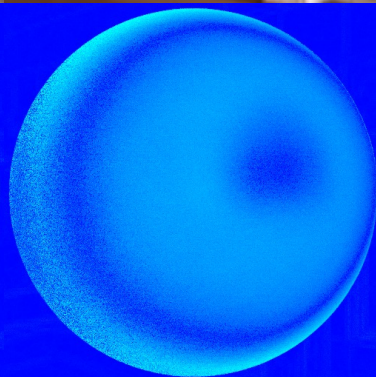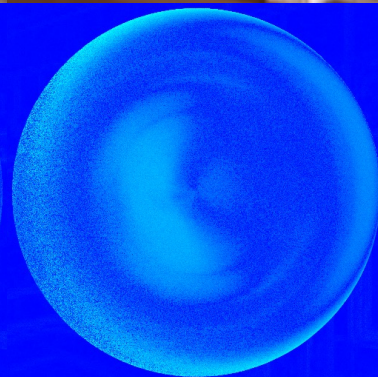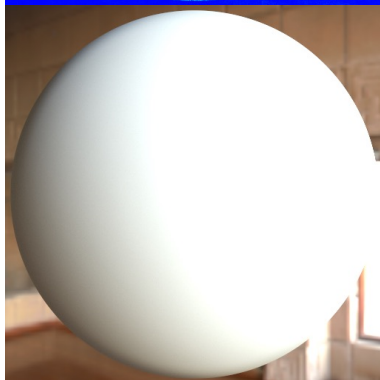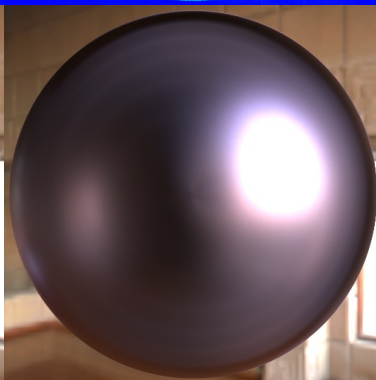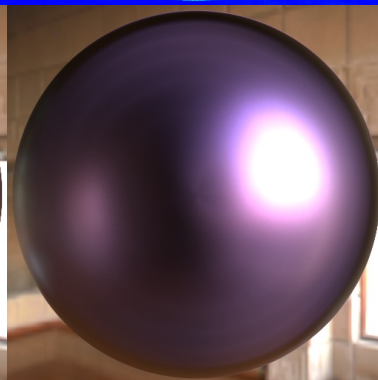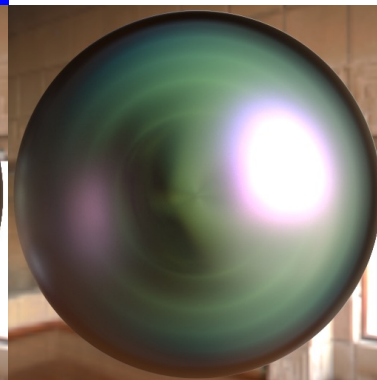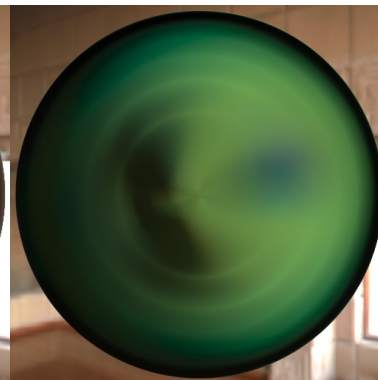

diffuse

sun18 spec.

Fresnel spec.

diffraction spec. diff. effect

# satin\_rosaline

ref

sun18

Fresnel

diffraction

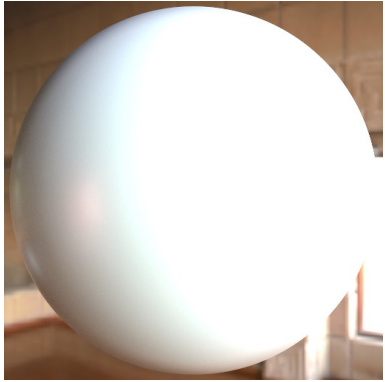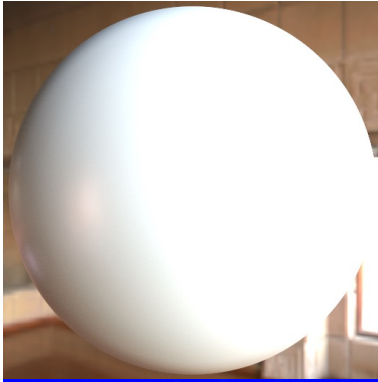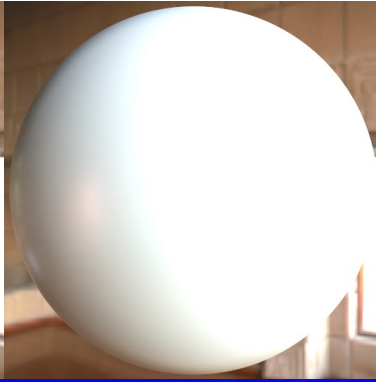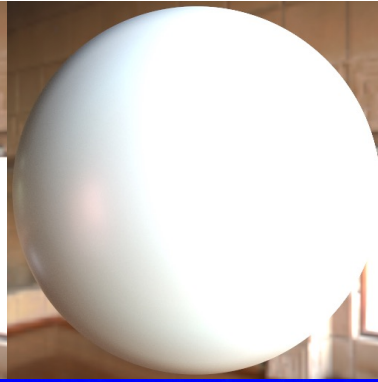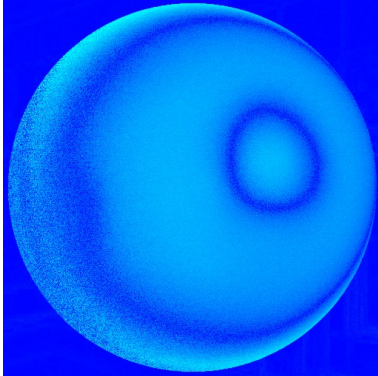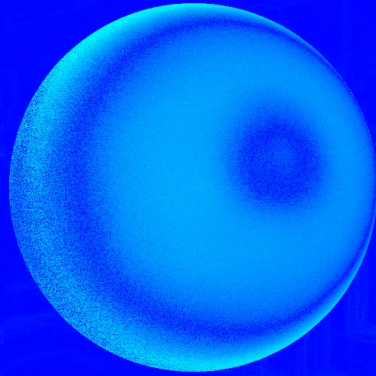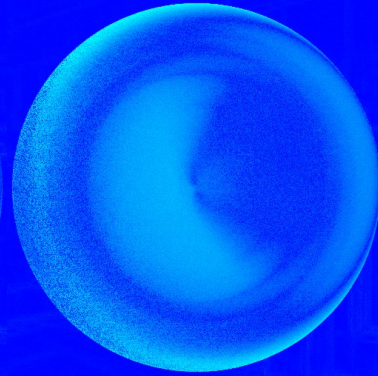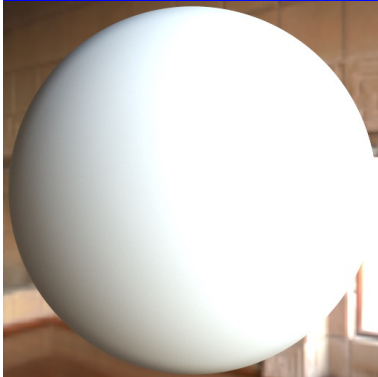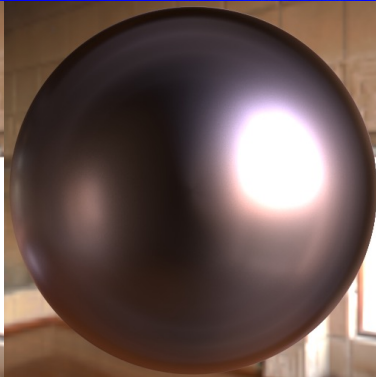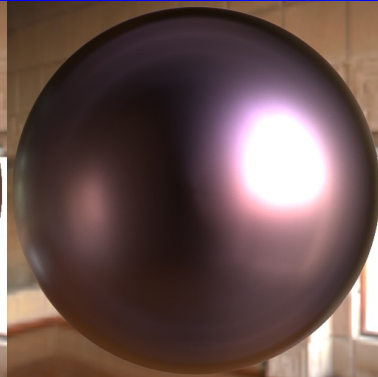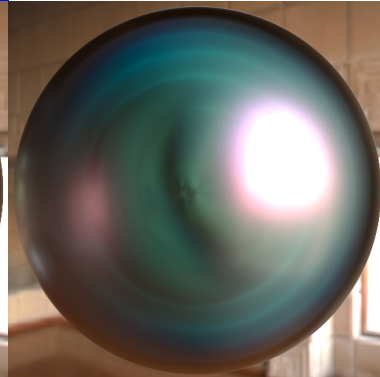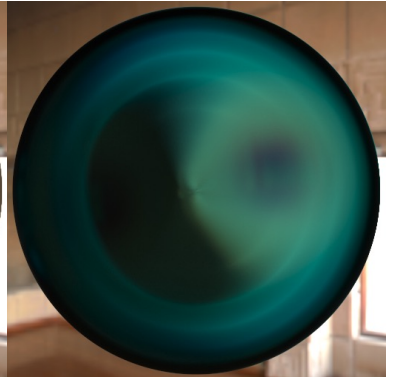

diffuse

sun18 spec.

Fresnel spec.

diffraction spec. diff. effect

# satin\_white

ref

sun18

Fresnel

diffraction

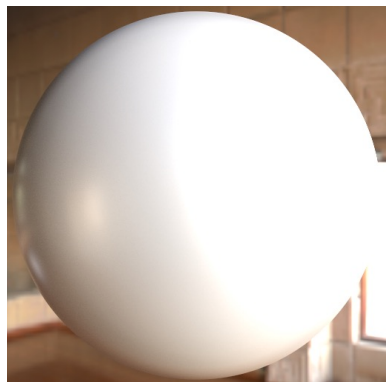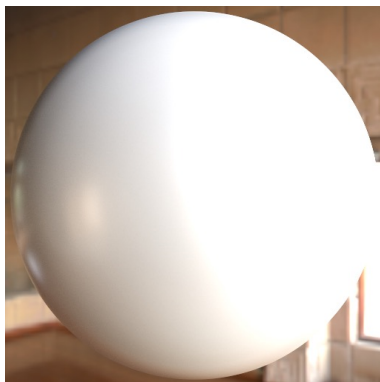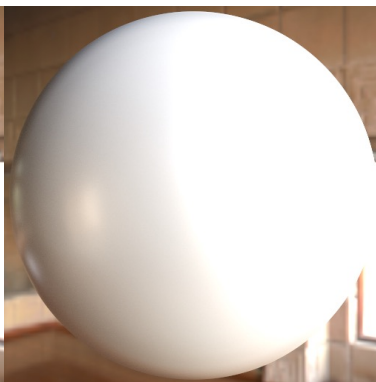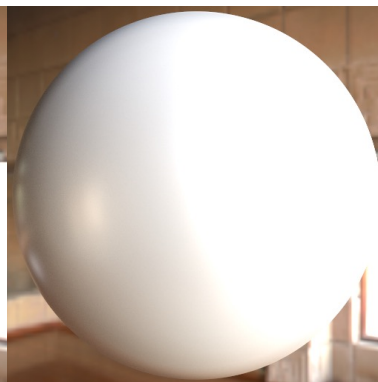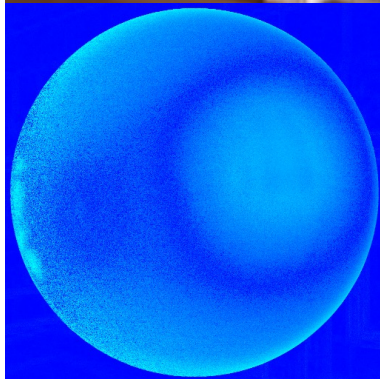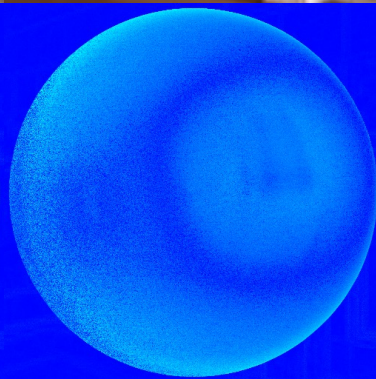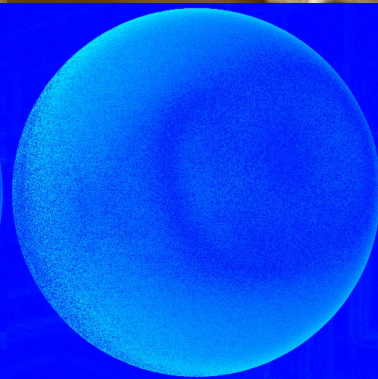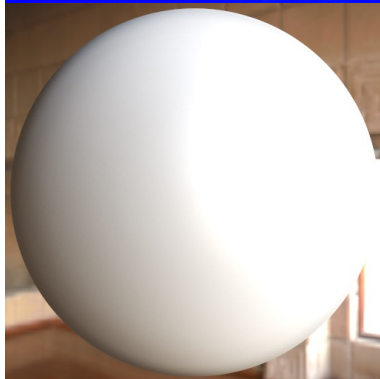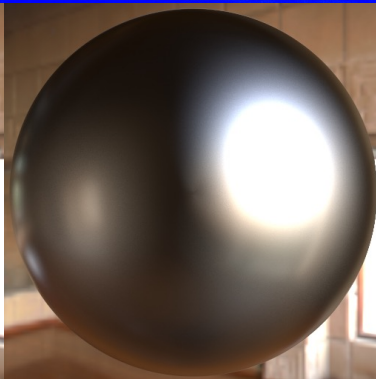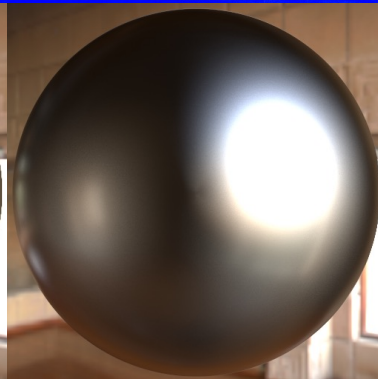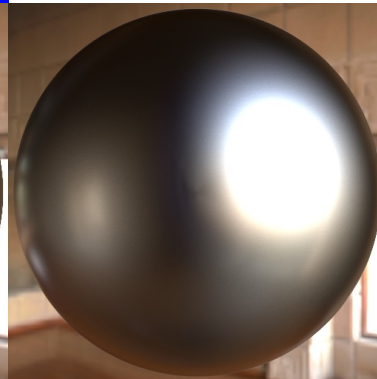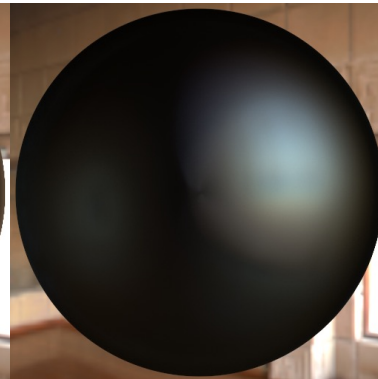

diffuse

sun18 spec.

Fresnel spec.

diffraction spec. diff. effect

# spectralon

ref

sun18

Fresnel

diffraction

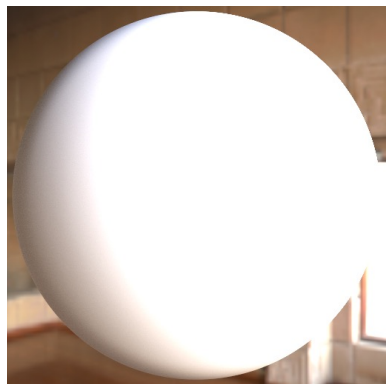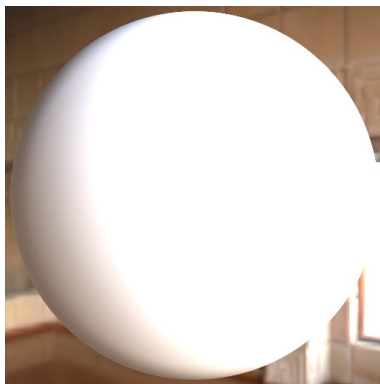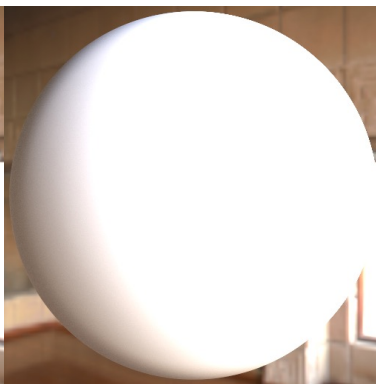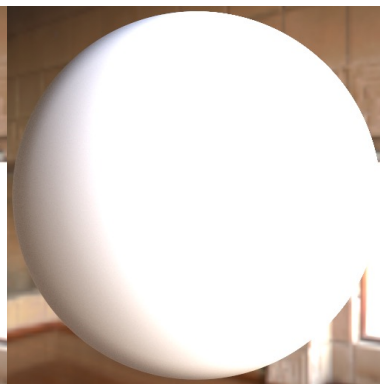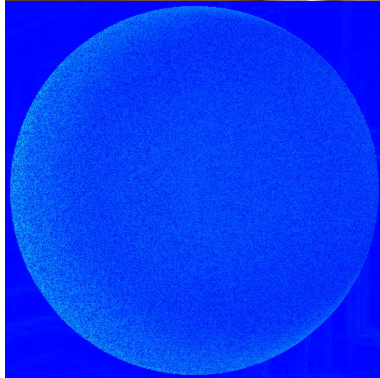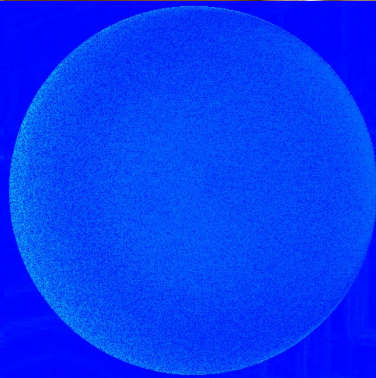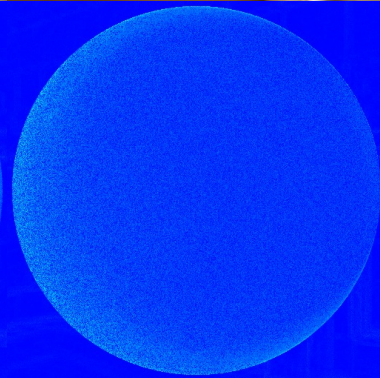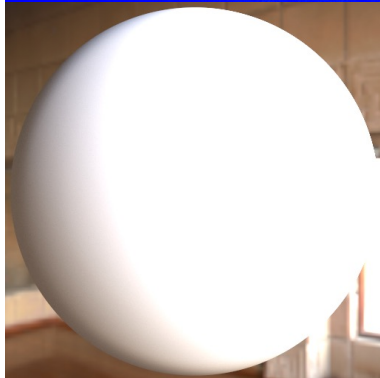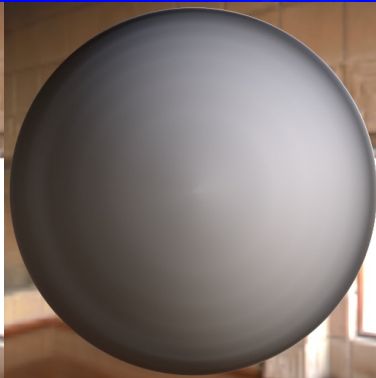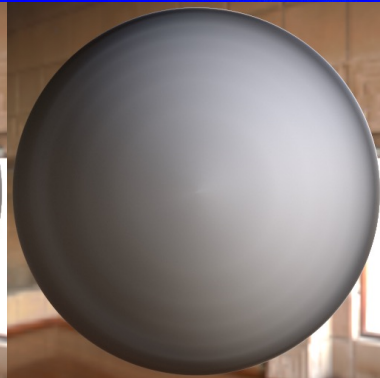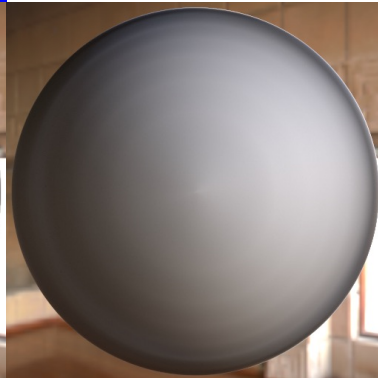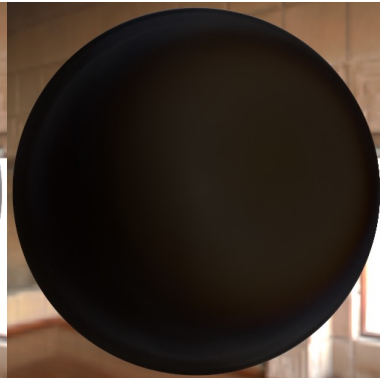

diffuse

sun18 spec.

Fresnel spec.

diffraction spec. diff. effect

# vch\_dragon\_eye\_red

ref

sun18

Fresnel

diffraction

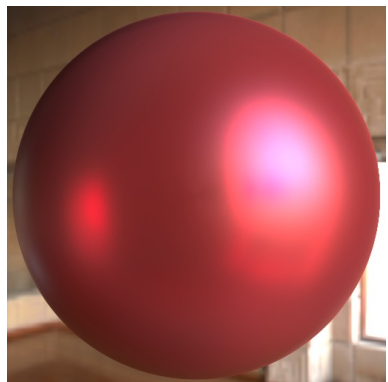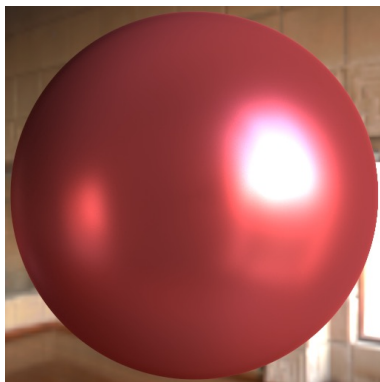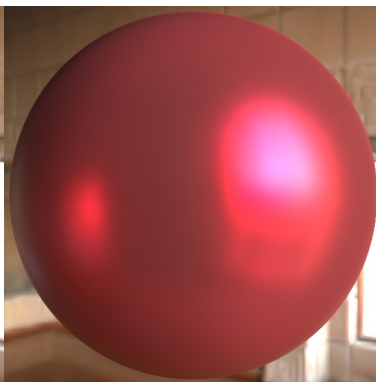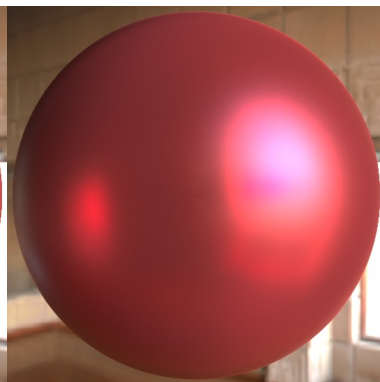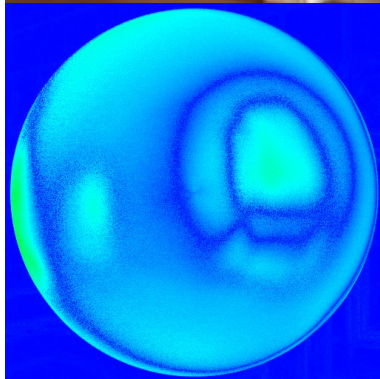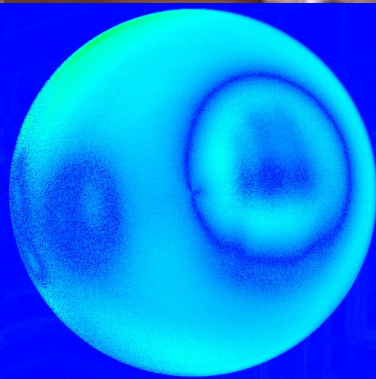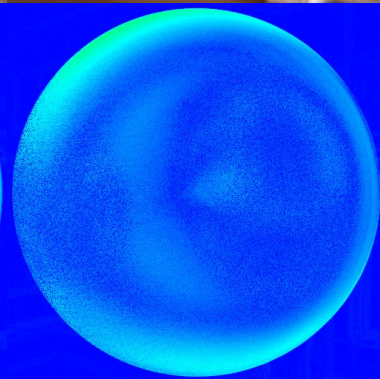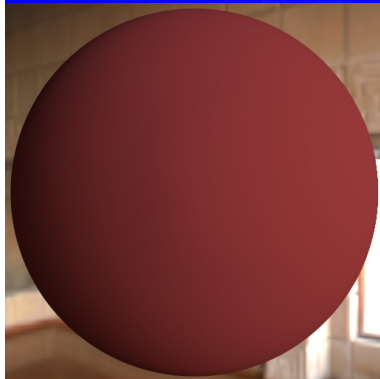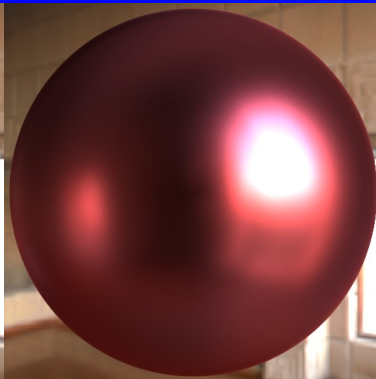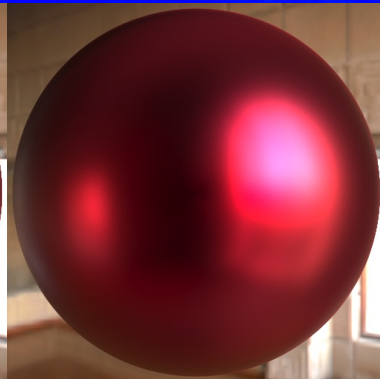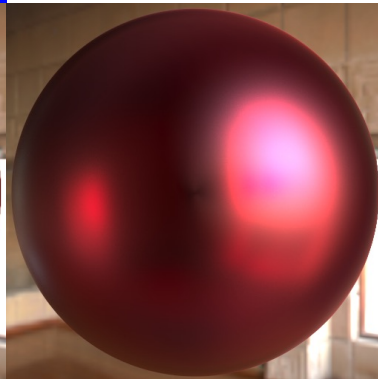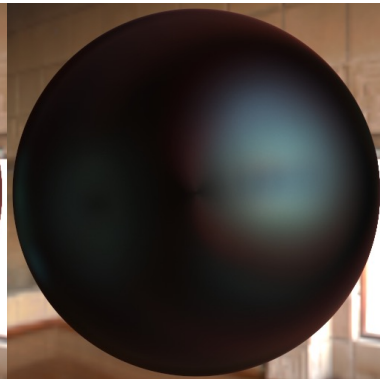

diffuse

sun18 spec.

Fresnel spec.

diffraction spec. diff. effect

# vch\_frozen\_amethyst

ref

sun18

Fresnel

diffraction

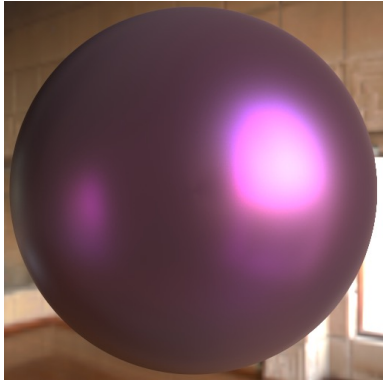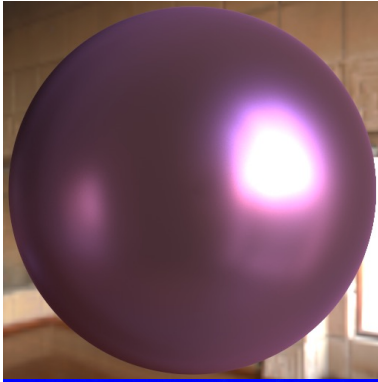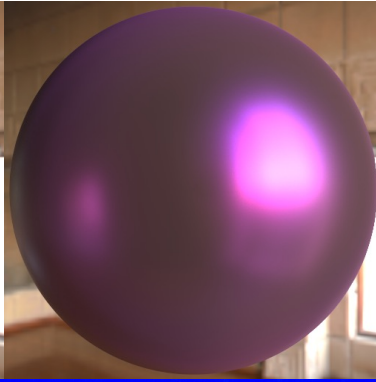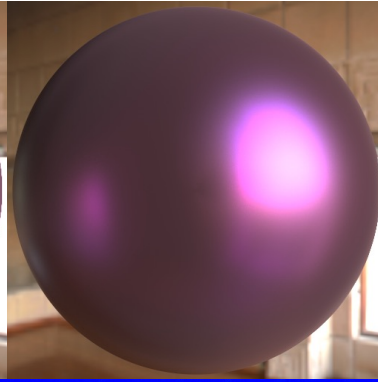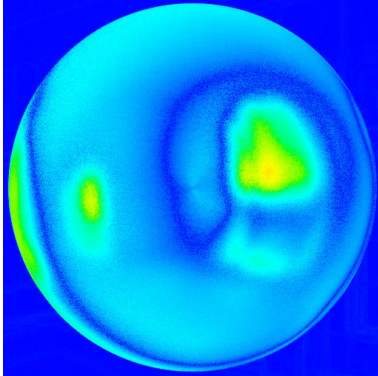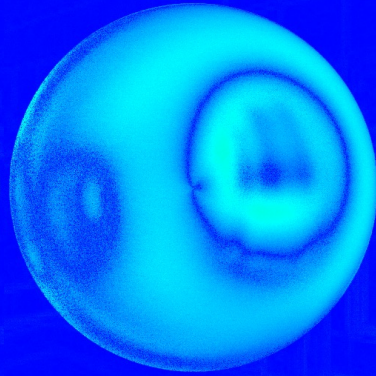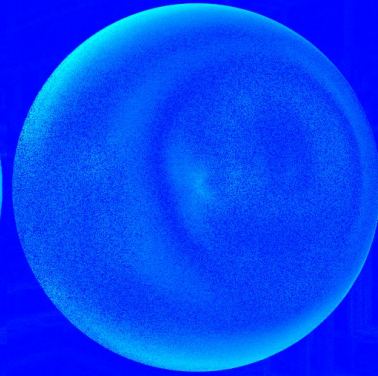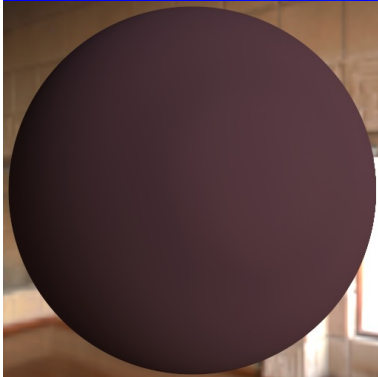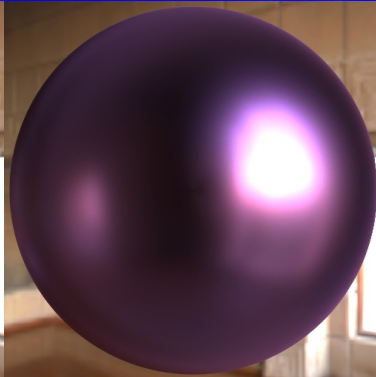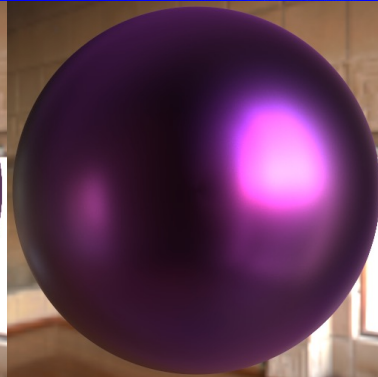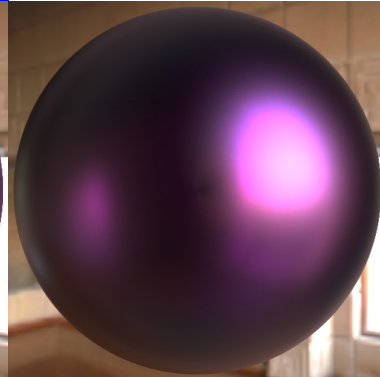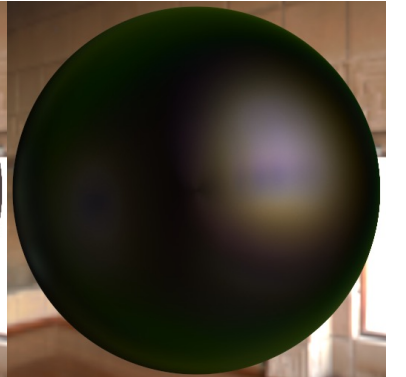

diffuse

sun18 spec.

Fresnel spec.

diffraction spec. diff. effect

# vch\_golden\_yellow

ref

sun18

Fresnel

diffraction

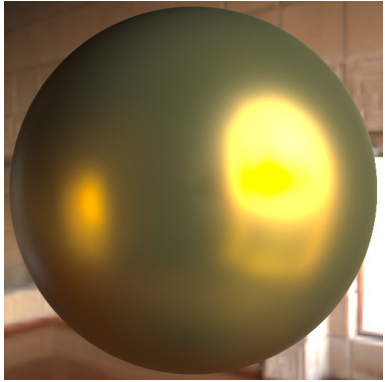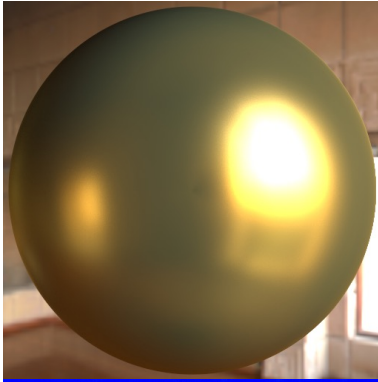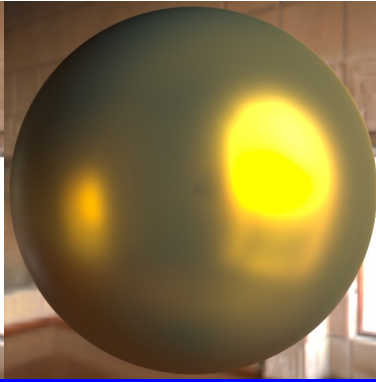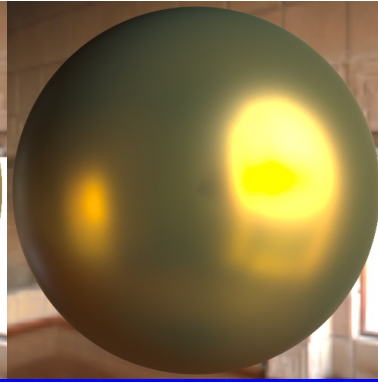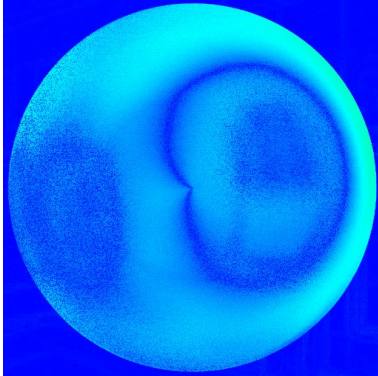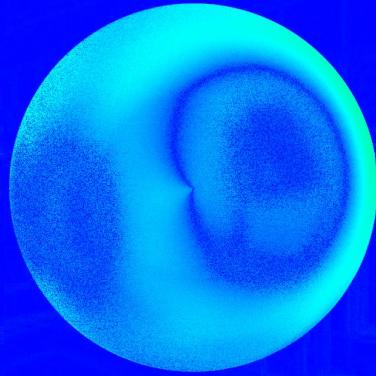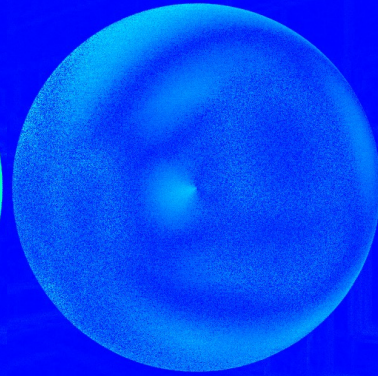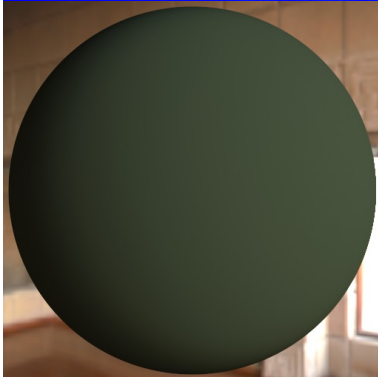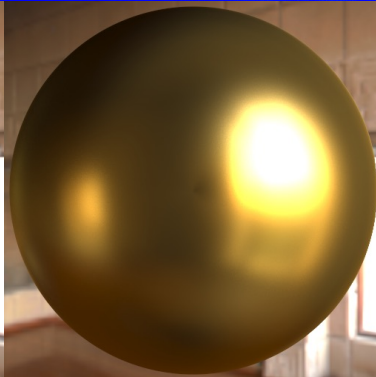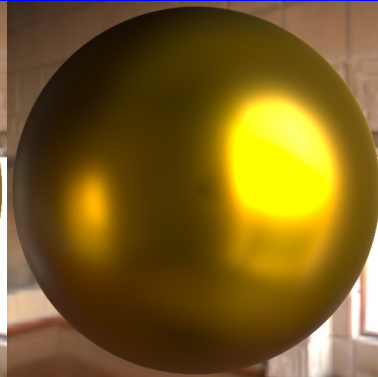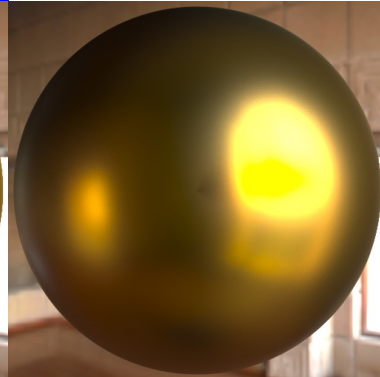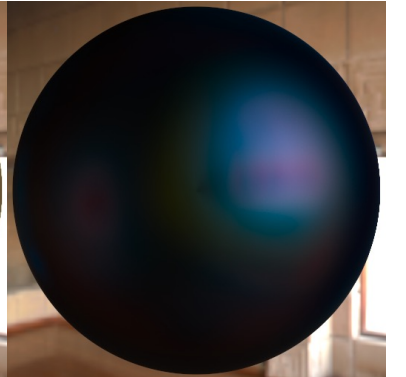

diffuse

sun18 spec.

Fresnel spec.

diffraction spec. diff. effect

# vch\_silk\_blue

ref

sun18

Fresnel

diffraction

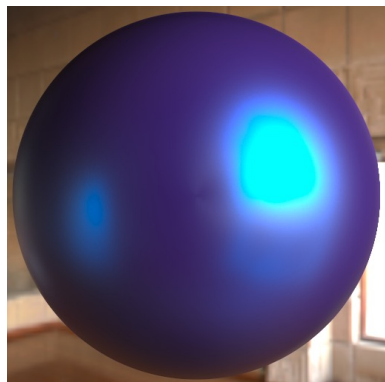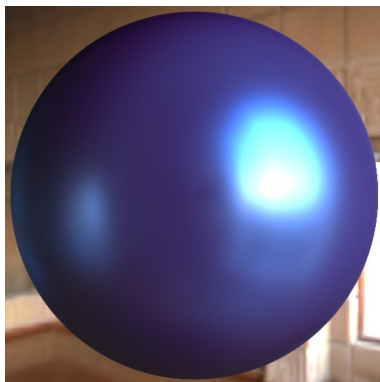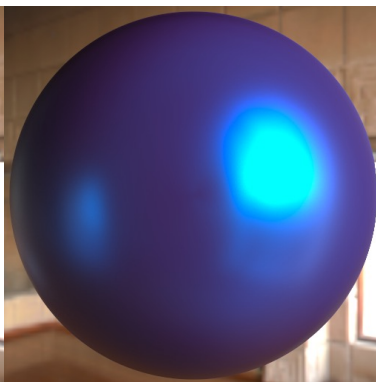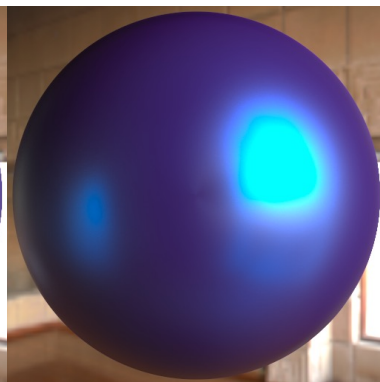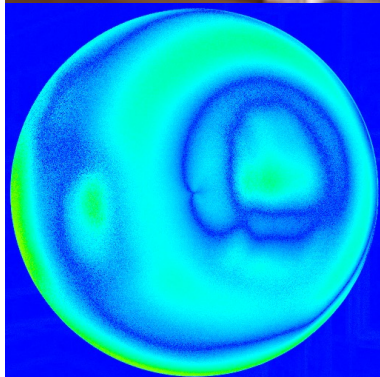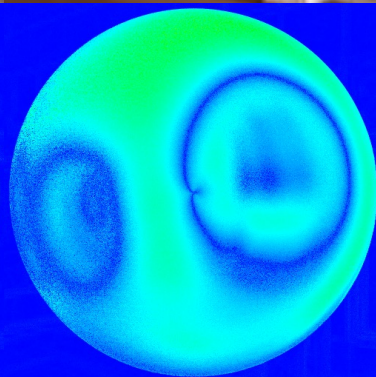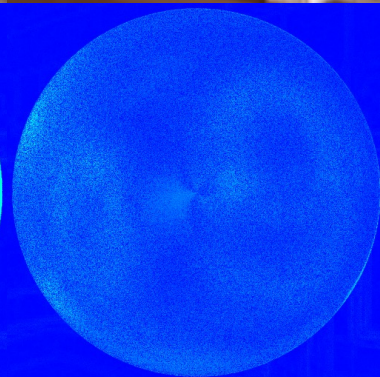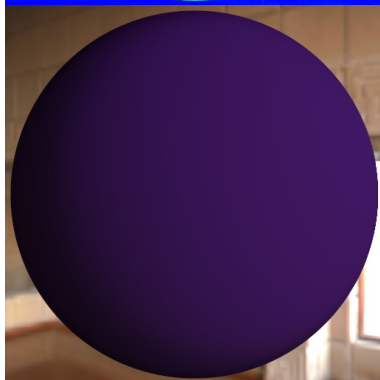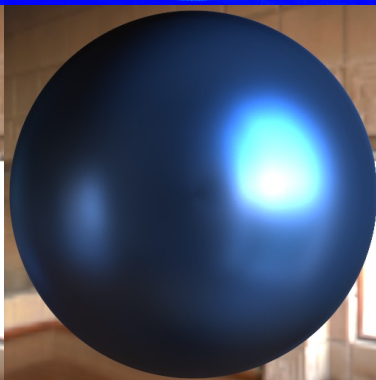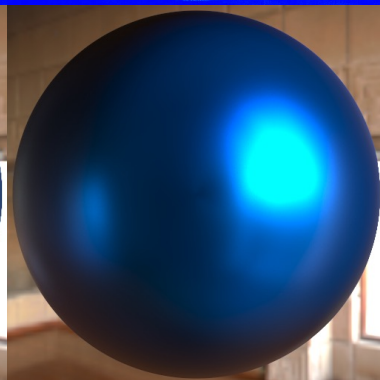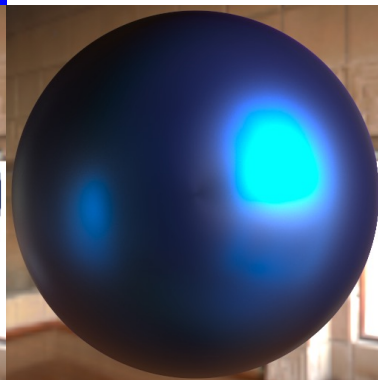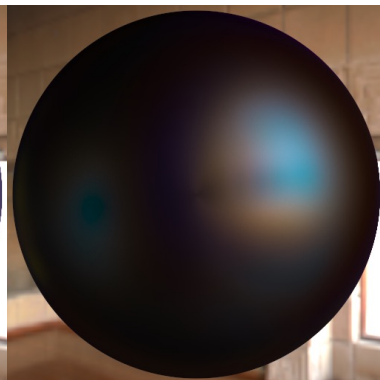

diffuse

sun18 spec.

Fresnel spec.

diffraction spec. diff. effect

# vch\_ultra\_pink

ref

sun18

Fresnel

diffraction

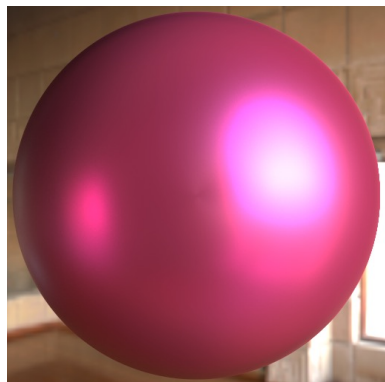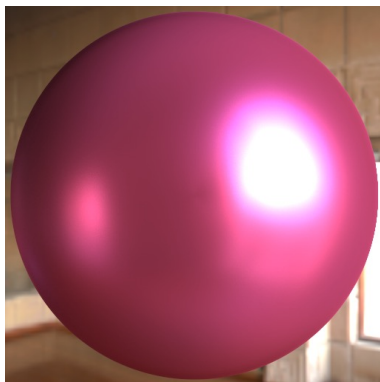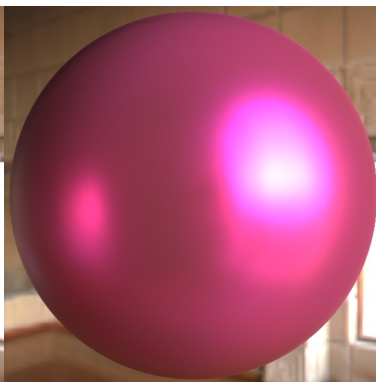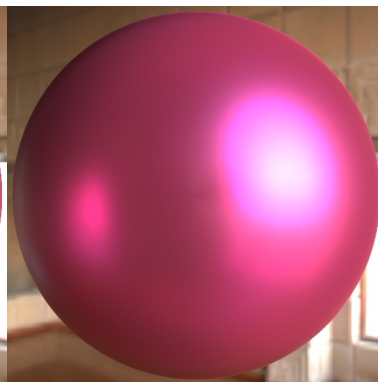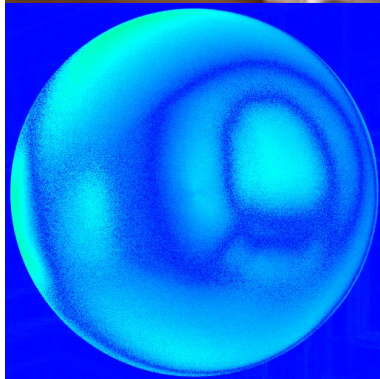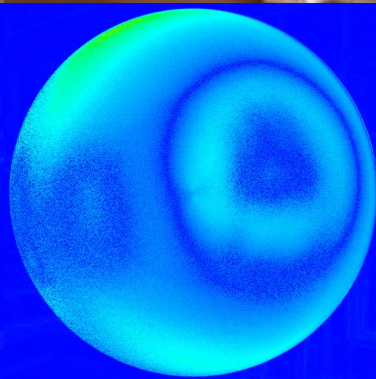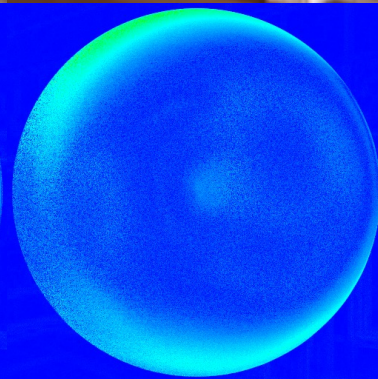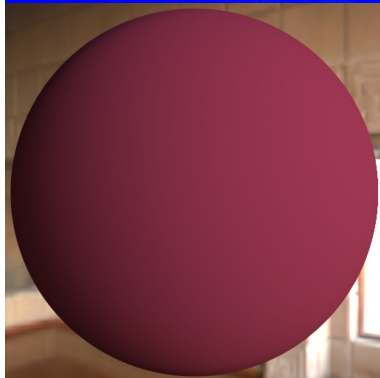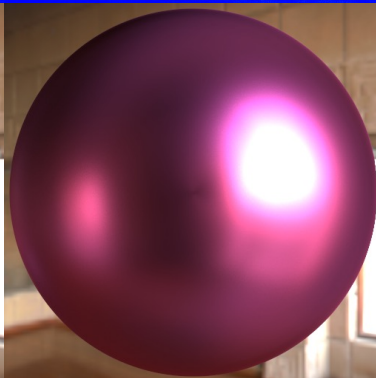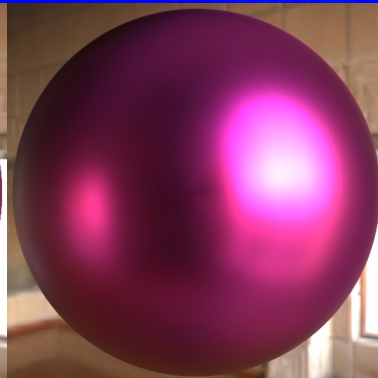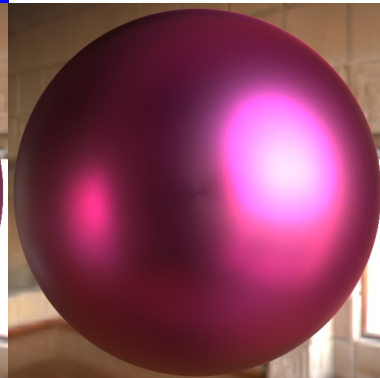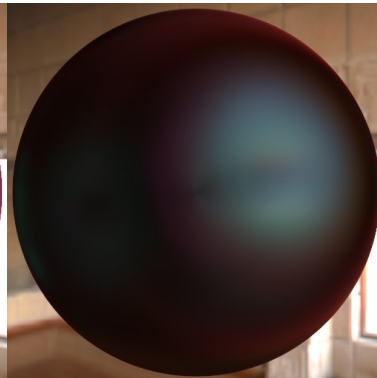

diffuse

sun18 spec.

Fresnel spec.

diffraction spec. diff. effect
